# Supplementary material for: Exploring the versatility of novel furan-based α,ω-diene carbonate monomers: synthesis, (co-)polymerization, and comparative study
Source: Royal Society of Chemistry journal article supplement (doi:10.1039/d4gc05132g), 2024-12-20
Supplement: d4gc05132g1.pdf [file d4gc05132g1.pdf]

## **Exploring the Versatility of Novel Furan-Based $\alpha,\omega$ -Diene Carbonate Monomers: Synthesis, (Co-)Polymerization, and Comparative Study**

*Beatriz Chícharo,<sup>a,b</sup> Sami Fadlallah,<sup>a\*</sup> Giacomo Trapasso,<sup>b</sup> Thomas Gherardi,<sup>b</sup> Florent Allais<sup>a\*</sup> and Fabio Aricò<sup>b\*</sup>*

<sup>[a]</sup> URD Agro-Biotechnologies Industrielles (ABI), CEBB, AgroParisTech, 3 Rue des Rouges-Terres, 51110 Pomacle

<sup>[b]</sup> Department of Environmental Sciences, Informatics and Statistics, Ca' Foscari University of Venice, Via Torino 155, 30172 Venezia Mestre

### **Supporting Information**

|                                                                                                           |     |
|-----------------------------------------------------------------------------------------------------------|-----|
| Experimental Section .....                                                                                | S3  |
| Materials and methods .....                                                                               | S3  |
| Monomer synthesis .....                                                                                   | S4  |
| Synthesis of diallyl carbonate .....                                                                      | S5  |
| Synthesis of di(but-3-en-1-yl) carbonate .....                                                            | S5  |
| Synthesis of di(hex-5-en-1-yl) carbonate .....                                                            | S6  |
| Synthesis of di(dec-9-en-1-yl) carbonate .....                                                            | S6  |
| Synthesis of furan-2,5-diylbis(methylene) dimethyl bis(carbonate) (DCMF) .....                            | S7  |
| Synthesis of diallyl (furan-2,5-diylbis(methylene)) bis(carbonate) ( <i>All</i> -BACF) .....              | S8  |
| Synthesis of di(but-3-en-1-yl) (furan-2,5-diylbis(methylene)) bis(carbonate) ( <i>But</i> -BACF) .....    | S9  |
| Synthesis of furan-2,5-diylbis(methylene) di(hex-5-en-1-yl) bis(carbonate) ( <i>Hex</i> -BACF) .....      | S10 |
| Synthesis of di(dec-9-en-1-yl) (furan-2,5-diylbis(methylene)) bis(carbonate) ( <i>Dec</i> -BACF) .....    | S11 |
| Synthesis of diallyl furan-2,5-dicarboxylate ( <i>All</i> -FDE) .....                                     | S12 |
| Synthesis of 2,5-bis((dec-9-en-1-yloxy)methyl)furan ( <i>Dec</i> -BDMF) .....                             | S12 |
| Synthesis of di(dec-9-en-1-yl) furan-2,5-dicarboxylate ( <i>Dec</i> -FDE) .....                           | S13 |
| Table S1. Optimization of furan-based $\alpha,\omega$ -diene carbonate monomers. ....                     | S14 |
| Table S2. Gram-scale furan-based $\alpha,\omega$ -diene carbonate monomers. ....                          | S14 |
| Homo-Polymer synthesis .....                                                                              | S15 |
| But-BACF derived homo-polymer ( <i>P</i> ( <i>But</i> -BACF) .....                                        | S15 |
| Hex-BACF derived homo-polymer ( <i>P</i> ( <i>Hex</i> -BACF) .....                                        | S16 |
| Dec-BACF derived homo-polymer ( <i>P</i> ( <i>Dec</i> -BACF) .....                                        | S16 |
| Table S3- Catalyst loading for the homo-polymerization of <i>But</i> -BACF via ADMET Polymerization. .... | S17 |
| Table S4- Homo-polymerization results of different furan-based $\alpha,\omega$ -diene monomers. ....      | S17 |
| Co-Polymer synthesis .....                                                                                | S18 |
| <i>P</i> ( <i>Dec</i> -BACF: <i>Dec</i> -FDE) (1:1) co-polymer .....                                      | S18 |
| <i>P</i> ( <i>Dec</i> -BDMF: <i>Dec</i> -BACF) (1:1) co-polymer .....                                     | S19 |
| <i>P</i> ( <i>Dec</i> -BDMF: <i>Dec</i> -FDE) (1:1) co-polymer .....                                      | S20 |
| <i>P</i> ( <i>Dec</i> -FDE: <i>But</i> -BACF) (1:1) co-polymer .....                                      | S21 |
| <sup>1</sup> H NMR and <sup>13</sup> C NMR spectra .....                                                  | S22 |
| DSC Thermograms .....                                                                                     | S51 |
| TGA analysis .....                                                                                        | S53 |
| SEC analysis .....                                                                                        | S57 |
| References .....                                                                                          | S60 |

## Experimental Section

### Materials and methods

All reagents and solvents were purchased from Merck and used without further purification. Reactions were conducted in either a silicon bath or in Drysyn at the required temperature, measured with a thermocouple. Reactions were monitored by TLC on an aluminium strip coated with silica gel 60 F254 from Merck, revealed under UV light (254 nm) and in the presence of permanganate staining solution.  $^1\text{H}$  NMR spectra of some monomers were obtained using a Bruker 400 MHz spectrometer in  $\text{CDCl}_3$ , and were calibrated using the residual signal of  $\text{CDCl}_3$  at 7.26 ppm.  $^{13}\text{C}$  NMR spectra were recorded on a Bruker Fourier 400 (101 MHz) in  $\text{CDCl}_3$ . Chromatographic purification was conducted using approximately 20 cm of silica. Polymerization was carried out under inert conditions using standard Schlenk techniques on a dual manifold line and a high-vacuum line. All ruthenium catalysts were purchased from Sigma-Aldrich (Merck), including Grubbs catalyst first generation ( $\text{C}_1$ ), Grubbs catalyst second generation ( $\text{C}_2$ ), dichloro[1,3-bis(2-methylphenyl)-2-imidazolidinylidene] (benzylidene) (tricyclohexylphosphine) ruthenium (II) (Grubbs catalyst M205) ( $\text{C}_3$ ), Hoveyda–Grubbs catalyst second generation ( $\text{C}_4$ ), dichloro[1,3-bis(2,4,6-trimethylphenyl)-2-imidazolidinylidene][[5-[(dimethylamino)sulfonyl]-2-(1-methylethoxy-O)phenyl]methylene-C] ruthenium(II) (Zhan catalyst-1B) ( $\text{C}_5$ ), dichloro[1,3-bis(2,4,6-trimethylphenyl)-2-imidazolidinylidene][[2-(1-methylacetoxy)phenyl]methylene} ruthenium(II) (Grubbs catalyst) M510 ( $\text{C}_6$ ), and Grubbs catalyst third generation ( $\text{C}_7$ ). All ruthenium catalysts used for the polymerization experiments were stored in an air-dried container at 2 °C.

Polymers were analysed by  $^1\text{H}$  NMR in  $\text{CDCl}_3$  using a Bruker Fourier 300 (300 MHz) and were calibrated using the residual signal of  $\text{CDCl}_3$  at 7.26 ppm.  $^{13}\text{C}$  NMR spectra were recorded on a Bruker Fourier 300 (75 MHz) in  $\text{CDCl}_3$  and calibrated using the solvent peak at 77.16 ppm. Additionally, 2D experiments were conducted, including  $^1\text{H}$ - $^1\text{H}$  COSY,  $^1\text{H}$ - $^{13}\text{C}$  HMBC, and  $^1\text{H}$ - $^{13}\text{C}$  HSQC spectra, to assign the peaks. Size-exclusion chromatography (SEC) was performed on an Agilent Technologies 1260 Infinity Series liquid chromatography system with an internal differential refractive index detector and two PLgel columns (5  $\mu\text{m}$  MIXED-D 300 x 7.5 mm) using HPLC grade THF as the mobile phase at a flow rate of 1.0 mL/min at 50  $^\circ\text{C}$ . Calibration was done with polystyrene standards from Agilent Technologies. Thermogravimetric Analysis (TGA) was carried out with a TGA Q500 (TA Instruments); 5 to 10 mg of dried sample was equilibrated at 50  $^\circ\text{C}$  for 5 min and flushed with highly pure nitrogen gas. All experiments were performed with a heating rate of 10  $^\circ\text{C}/\text{min}$  up to 600  $^\circ\text{C}$ . The reported values of  $T_{\text{d}5\%}$  represent the temperature at which 5% of the product mass is lost. Differential Scanning Calorimetry (DSC) was performed with a DSC Q20 (TA Instruments); 8 to 14 mg of sample were placed in a sealed pan, flushed with highly pure nitrogen gas and subjected to a heat-cool-heat cycle at 10  $^\circ\text{C}/\text{min}$  in a temperature range of  $-70$   $^\circ\text{C}$  to 150  $^\circ\text{C}$ . Three heat/cool cycles were done for each sample, and the  $T_g$  values recorded were from the third cycle.

### **Monomer synthesis**

The monomers were prepared adapting a previously published procedure used to synthesize several dialkyl carbonates.<sup>3</sup>

### Synthesis of diallyl carbonate

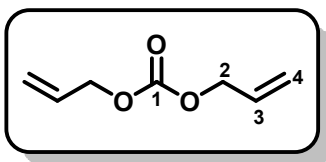

Diallyl carbonate was obtained as a clear liquid from the reaction mixture using fractional distillation ( $T(\text{ext}) = 105\text{--}110\text{ }^\circ\text{C}$ ,  $T(\text{vapour}) = 85\text{--}90\text{ }^\circ\text{C}$ ,  $p = 60\text{ mbar}$ ). With a final yield of 59%.

$^1\text{H NMR}$  (300 MHz  $\text{CDCl}_3$ )  $\delta$  (ppm) 5.94 (1H, s,  $\text{H}_3$ ); 5.37 (1H, s,  $\text{H}_4$ ); 5.27 (1H, s,  $\text{H}_4$ ); 4.64 (2H, s,  $\text{H}_2$ ).

$^{13}\text{C NMR}$  (75 MHz,  $\text{CDCl}_3$ )  $\delta$  (ppm) 154.8 ( $\text{C}_1$ ); 131.6 ( $\text{C}_3$ ); 118.9 ( $\text{C}_4$ ); 68.5 ( $\text{C}_2$ ).

### Synthesis of di(but-3-en-1-yl) carbonate

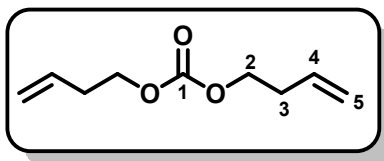

Di(but-3-en-1-yl) carbonate was obtained as clear liquid after filtration in acidic silica followed by fractional distillation under vacuum ( $T(\text{ext}) = 40\text{--}50\text{ }^\circ\text{C}$ ,  $T(\text{vapour}) = 25\text{ }^\circ\text{C}$ ,  $p = 60\text{ mbar}$ ) with a final yield of 74%.

$^1\text{H NMR}$  (300 MHz  $\text{CDCl}_3$ )  $\delta$  (ppm) 5.79 (1H, s,  $\text{H}_4$ ); 5.11 (2H, d,  $J = 14.1\text{ Hz}$ ,  $\text{H}_5$ ); 4.18 (2H, s,  $\text{H}_2$ ); 2.43 (2H, s,  $\text{H}_3$ ).

$^{13}\text{C NMR}$  (75 MHz,  $\text{CDCl}_3$ )  $\delta$  (ppm) 155.2 ( $\text{C}_1$ ); 133.5 ( $\text{C}_4$ ); 117.6 ( $\text{C}_5$ ); 66.9 ( $\text{C}_2$ ); 33.1 ( $\text{C}_3$ ).

### Synthesis of di(hex-5-en-1-yl) carbonate

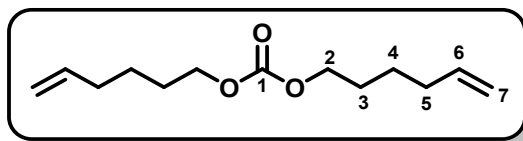

Di(hex-5-en-1-yl) carbonate was obtained as clear liquid after filtration in acidic silica followed by fractional distillation under vacuum ( $T(\text{ext}) = 55\text{-}65\text{ }^\circ\text{C}$ ,  $T(\text{vapour}) = 36\text{ - }40\text{ }^\circ\text{C}$ ,  $p = 60\text{ mbar}$ ) with a final yield of 68%.

$^1\text{H NMR}$  (300 MHz  $\text{CDCl}_3$ )  $\delta$  (ppm) 5.78 (1H, ddt,  $J = 16.9, 10.2, 6.6\text{ Hz}$ ,  $\text{H}_6$ ); 5.08 – 4.88 (2H, m,  $\text{H}_7$ ); 4.12 (2H, t,  $J = 6.6\text{ Hz}$ ,  $\text{H}_2$ ); 2.13 – 1.99 (2H, m,  $\text{H}_5$ ); 1.81 – 1.56 (2H, m,  $\text{H}_3$ ); 1.55 – 1.40 (2H, m,  $\text{H}_4$ ).

$^{13}\text{C NMR}$  (75 MHz,  $\text{CDCl}_3$ )  $\delta$  (ppm) 155.4 (C1); 138.2 (C6); 114.9 (C7); 67.8 (C2); 33.2 (C5); 28.1 (C4); 24.9 (C3).

### Synthesis of di(dec-9-en-1-yl) carbonate

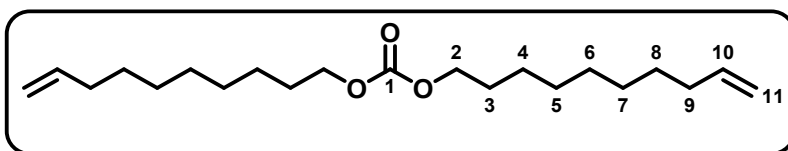

Di(dec-9-en-1-yl) carbonate was obtained as clear liquid after filtration in acidic silica followed by fractional distillation under vacuum ( $T(\text{ext}) = 110\text{ - }140\text{ }^\circ\text{C}$ ,  $T(\text{vapour}) = 86\text{ - }95\text{ }^\circ\text{C}$ ,  $p = 60\text{ mbar}$ ) with a final yield of 70%.

$^1\text{H NMR}$  (300 MHz,  $\text{CDCl}_3$ )  $\delta$  (ppm) 5.81 (1H, ddt,  $J = 16.9, 10.2, 6.7\text{ Hz}$ ,  $\text{H}_{10}$ ); 5.05 – 4.87 (2H, m,  $\text{H}_{11}$ ); 4.13 (2H, t,  $J = 6.7\text{ Hz}$ ,  $\text{H}_2$ ); 2.11 – 1.96 (2H, m,  $\text{H}_9$ ); 1.76 – 1.57 (2H, m,  $\text{H}_3$ ); 1.32 (11H, t,  $J = 4.6\text{ Hz}$ ,  $\text{H}_{4-8}$ ).

**<sup>13</sup>C NMR (75 MHz, CDCl<sub>3</sub>) δ (ppm)** 155.4 (C<sub>1</sub>); 139.1 (C<sub>10</sub>); 114.1 (C<sub>11</sub>); 68.0 (C<sub>2</sub>); 33.8 (C<sub>9</sub>); 29.3 (C<sub>6</sub>); 29.2 (C<sub>7</sub>); 29.0 (C<sub>8</sub>); 28.9 (C<sub>5</sub>); 28.7 (C<sub>3</sub>); 25.7 (C<sub>4</sub>).

### Synthesis of furan-2,5-diylbis(methylene) dimethyl bis(carbonate) (DCMF)

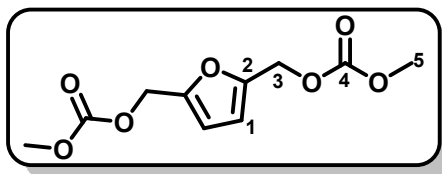

In a two-necked round bottom flask a mixture of (1.00 g, 1.00 g, 7.80 mmol, 1.00 eq. mol) of BHMf was mixed with dimethyl carbonate (DMC) (7.03 g, 78.00 mmol, 10 eq. mol) and (0.01 g, 0.08 mmol, 0.01 eq. mol) of TBD as a basic catalyst. The flask was coupled with a Dean-Stark apparatus and N<sub>2</sub> flow. The reaction mixture was stirred vigorously and heated to 95 °C. The reaction progress was monitored by TLC. After 1 hour and 30 minutes, the reaction was stopped and the mixture was cooled at room temperature. The crude was filtered under vacuum with a gooch packed with acidic silica and washed with dichloromethane. The product was concentrated under reduced pressure obtaining a pale yellow solid (1.59 g) with an isolated yield of 85%.

Characterization was coherent with previously published data.<sup>4</sup>

**<sup>1</sup>H NMR (400 MHz, CDCl<sub>3</sub>): δ (ppm)** 6.45 (1H, s, H<sub>1</sub>), 5.11 (2H, s, H<sub>3</sub>), 3.82 (3H, s, H<sub>5</sub>).

**<sup>13</sup>C NMR (100 MHz, CDCl<sub>3</sub>): δ (ppm)** 155.4 (C<sub>4</sub>), 149.7 (C<sub>2</sub>), 112.1 (C<sub>1</sub>), 61.2 (C<sub>3</sub>), 55.0 (C<sub>5</sub>).

### Synthesis of diallyl (furan-2,5-diylbis(methylene)) bis(carbonate) (All- BACF)

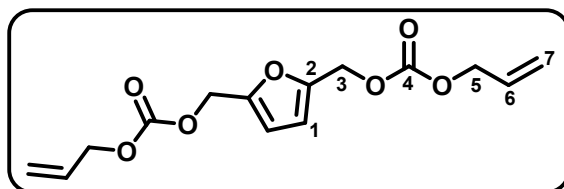

A mixture of (1.00 g, 7.80 mmol, 1.00 eq. mol) of BHMf, diallyl carbonate (11.10 g, 78.08 mmol, 10.00 eq. mol), and TBD (0.01 g, 0.08 mmol, 0.01 eq. mol) was placed in a two-necked round bottom flask equipped with a Dean-Stark apparatus, a magnetic stirrer, and N<sub>2</sub> flow. The flask was heated to 95 °C. Once the temperature was reached, it was maintained for 1 hour and 30 minutes. The reaction progress was monitored by TLC on an aluminium strip coated with silica gel, using dichloromethane as an eluent phase revealed in the presence of potassium permanganate staining solution.

Afterward, the reaction mixture was filtered over acidic silica and washed with dichloromethane. The solvent is then evaporated using a rotary evaporator, followed by vacuum distillation (T(ext) = 50 °C, T(vapour) = 32 °C, p = 60 mbar) recovering 77% of the excess carbonate used in the reaction. The pure product was isolated as a light yellow liquid (1.92 g) with a yield of 83%. Characterization was in accordance with previously published data.<sup>4</sup>

**<sup>1</sup>H NMR (300 MHz, CDCl<sub>3</sub>) δ (ppm)** 6.42 (1H, s, H<sub>1</sub>); 5.92 (1H, ddt, J = 17.2, 10.4, 5.8 Hz, H<sub>6</sub>); 5.41 – 5.20 (2H, m, H<sub>7</sub>); 5.09 (2H, s, H<sub>3</sub>); 4.63 (2H, dt, J = 5.8, 1.4 Hz, H<sub>5</sub>).

**<sup>13</sup>C NMR (75 MHz, CDCl<sub>3</sub>) δ (ppm)** 154.6 (C<sub>4</sub>); 149.7 (C<sub>2</sub>); 131.4 (C<sub>6</sub>); 119.0 (C<sub>7</sub>); 112.1 (C<sub>1</sub>); 68.7 (C<sub>5</sub>); 61.2 (C<sub>3</sub>).

#### Synthesis of di(but-3-en-1-yl) (furan-2,5-diylbis(methylene)) bis(carbonate) (*But-BACF*)

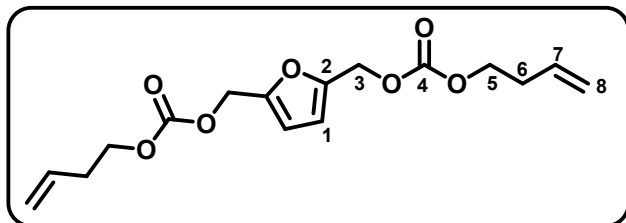



In a typical reaction BHMf (1.00 g, 7.80 mmol, 1.00 eq. mol), di(but-3-en-1-yl) carbonate (6.64 g, 39.00 mmol, 5.00 eq. mol), and TBD (0.03 g, 0.39 mmol, 0.05 eq. mol) were added to a 2-necked 25 ml round bottom flask. The reaction was kept for 2 hours at 110 °C with a Dean-Stark apparatus, magnetic stirrer, and N<sub>2</sub> flow. The reaction progress was monitored by TLC on an aluminium strip coated with silica gel, using dichloromethane as an eluent phase revealed in the presence of potassium permanganate staining solution.

Afterward, the reaction mixture was filtered over acidic silica and washed with dichloromethane. The solvent was then evaporated using a rotary evaporator, followed by vacuum distillation (T(ext) = 116 °C, T(vapour) = 95 °C, p = 60 mbar) recovering 74% of the excess carbonate used in the reaction. The pure product was recovered in the form of a yellowish liquid (1.90 g) in 75% yield.

**<sup>1</sup>H NMR (300 MHz, CDCl<sub>3</sub>) δ (ppm)** 6.42 (1H, d, *J* = 0.7 Hz, H<sub>1</sub>); 5.88 – 5.70 (1H, m, H<sub>7</sub>); 5.18 – 5.02 (4H, m, H<sub>8,3</sub>); 4.20 (2H, td, *J* = 6.8, 0.5 Hz, H<sub>5</sub>); 2.49 – 2.35 (2H, m, H<sub>6</sub>).

**<sup>13</sup>C NMR (75 MHz, CDCl<sub>3</sub>) δ (ppm)** 154.8 (C<sub>4</sub>); 149.7 (C<sub>2</sub>); 133.3 (C<sub>7</sub>); 117.7 (C<sub>8</sub>); 112.1 (C<sub>1</sub>); 67.3 (C<sub>5</sub>); 61.1 (C<sub>3</sub>); 33.0 (C<sub>6</sub>).

#### Synthesis of furan-2,5-diylbis(methylene) di(hex-5-en-1-yl) bis(carbonate) (*Hex-BACF*)

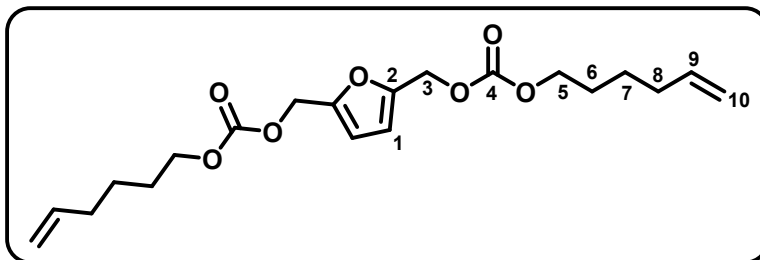

In a typical reaction BHMF (1.00 g, 7.80 mmol, 1.00 eq. mol), di(hex-5-en-1-yl) carbonate (17.65 g, 78.00 mmol, 10.00 mol. eq.), and TBD (0.20 g, 1.56 mmol, 0.20 eq. mol) were added to a 2-necked 25 ml round bottom flask. The reaction was kept for 3 hours at 140 °C with a Dean-Stark apparatus, magnetic stirrer, and inert gas flow. The reaction progress was monitored by TLC on an aluminium strip coated with silica gel, using dichloromethane as an eluent phase revealed in the presence of potassium permanganate staining solution.

The mixture was filtered using a gooch packed with acid silica and washed with dichloromethane to remove TBD. Then, the mixture was evaporated and dried under vacuum to obtain the crude product as a yellow liquid. The weight of the reaction crude was measured and then analysed using proton NMR to determine conversion and selectivity.

Reaction product was isolated by silica gel chromatographic column using gradient-elution (Hexane:EtOAc from 98:2 to 9:1) as a yellowish liquid (1.80 g) with a yield of 61%.

**<sup>1</sup>H NMR (300 MHz, CDCl<sub>3</sub>) δ (ppm)** 6.25 (1H, s, H<sub>1</sub>); 5.79 (1H, ddt, *J* = 16.9, 10.2, 6.6 Hz, H<sub>9</sub>); 4.95 (2H, m, H<sub>10</sub>); 4.41 (2H, s, H<sub>3</sub>); 3.47 (2H, t, *J* = 6.5 Hz, H<sub>5</sub>); 2.05 (H<sub>2</sub>, qt, *J* = 6.9, 1.5 Hz, H<sub>8</sub>); 1.60 (H<sub>2</sub>, m, H<sub>6</sub>); 1.45 (H<sub>2</sub>, m, H<sub>7</sub>).

**<sup>13</sup>C NMR (75 MHz, CDCl<sub>3</sub>) δ (ppm)** 152.3 (C<sub>4</sub>); 138.7 (C<sub>2</sub>); 114.5 (C<sub>9</sub>); 114.5 (C<sub>10</sub>); 109.6 (C<sub>1</sub>); 70.2 (C<sub>5</sub>); 64.9 (C<sub>3</sub>); 33.5 (C<sub>8</sub>); 29.1 (C<sub>7</sub>); 25.4 (C<sub>6</sub>).

### Synthesis of di(dec-9-en-1-yl) (furan-2,5-diylbis(methylene)) bis(carbonate) (*Dec-BACF*)

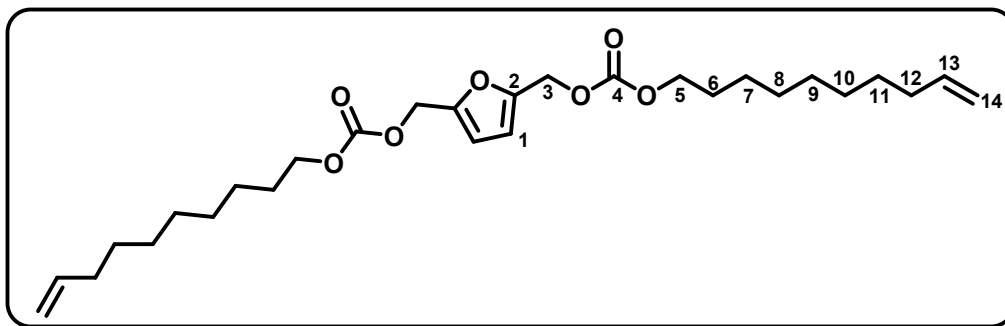

In a typical reaction BHMf (0.22 g, 1.70 mmol, 1.00 eq. mol), di(dec-9-en-1-yl) carbonate (3.00 g, 8.86 mmol, 5.00 mol. eq.), and TBD (0.02 g, 0.14 mmol, 0.05 eq. mol) were added to a 2-necked 25 ml round bottom flask. The reaction was kept for 3 hours at 140 °C with a Dean-Stark apparatus, magnetic stirrer, and N<sub>2</sub> flow. The reaction progress was monitored by TLC on an aluminium strip coated with silica gel, using dichloromethane as an eluent phase revealed in the presence of potassium permanganate staining solution. The mixture was filtered using a gooch with acid silica and washed with dichloromethane to remove TBD.

Then, the mixture was evaporated and dried under vacuum to obtain the crude product as a yellow liquid. Reaction product was isolated by silica gel chromatographic column via gradient elution (Hexane:EtOAc from 98:2 to 9:1) as a yellowish liquid (0.37 g) with a yield of 44%.

**<sup>1</sup>H NMR (300 MHz, CDCl<sub>3</sub>) δ (ppm)** 6.41 (1H, s, H<sub>1</sub>); 5.80 (1H, ddt, J = 16.9, 10.2, 6.7 Hz, H<sub>13</sub>); 5.06 (2H, s, H<sub>3</sub>); 5.03 – 4.88 (2H, m, H<sub>14</sub>); 4.14 (2H, t, J = 6.7 Hz, H<sub>5</sub>); 2.03 (2H, tdd, J = 6.6, 5.3, 1.4 Hz, H<sub>12</sub>); 1.72 – 1.58 (2H, m, H<sub>6</sub>); 1.45 – 1.16 (10H, m, H<sub>7</sub>-H<sub>11</sub>).

**<sup>13</sup>C NMR (75 MHz, CDCl<sub>3</sub>) δ (ppm)** 154.9 (C<sub>4</sub>); 149.8 (C<sub>2</sub>); 139.1 (C<sub>13</sub>); 114.2 (C<sub>14</sub>); 112.0 (C<sub>1</sub>); 68.5 (C<sub>5</sub>), 61.0 (C<sub>3</sub>); 33.7 (C<sub>12</sub>); 29.3 (C<sub>9</sub>); 29.1 (C<sub>10</sub>); 29.0 (C<sub>11</sub>); 28.9 (C<sub>6</sub>); 28.6 (C<sub>8</sub>); 25.6 (C<sub>7</sub>).

### Synthesis of diallyl furan-2,5-dicarboxylate (*All-FDE*)

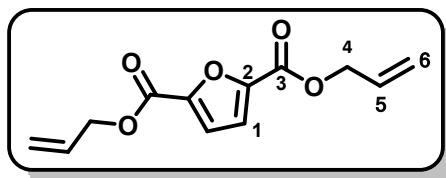

*All-FDE* was prepared using a previously published procedure.<sup>2</sup>

**<sup>1</sup>H NMR (400 MHz, CDCl<sub>3</sub>) δ (ppm)** 7.26 (2H, s, H<sub>1</sub>), 6.04 (2H, m, H<sub>5</sub>), 5.44 (2H, dt, J = 17.2, 1.6 Hz, H<sub>6</sub>), 5.34 (2H, dq, J = 10.4, 1.5 Hz, H<sub>6</sub>), 4.86 (4H, dq, 4.85, J = 5.9, 1.6 Hz, H<sub>4</sub>).

**<sup>13</sup>C NMR (101 MHz, CDCl<sub>3</sub>) δ (ppm)** 157.7 (C<sub>3</sub>), 146.8 (C<sub>2</sub>), 131.5 (C<sub>5</sub>), 119.2 (C<sub>1</sub>), 118.6 (C<sub>6</sub>), 66.1 (C<sub>4</sub>).

### Synthesis of 2,5-bis((dec-9-en-1-yloxy)methyl)furan (*Dec-BDMF*)

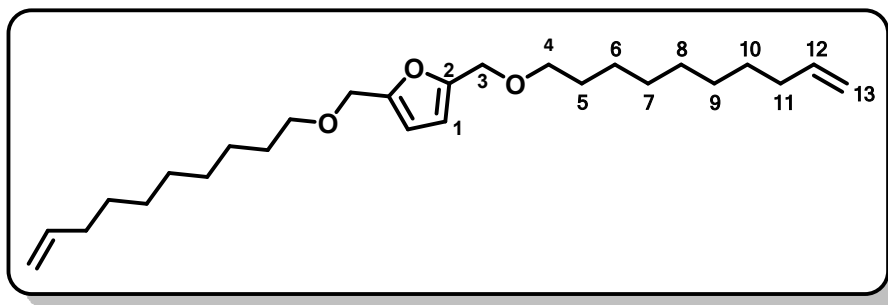

*Dec-BDMF* was prepared using a previously published procedure.<sup>1</sup>

**<sup>1</sup>H-NMR (400 MHz, CDCl<sub>3</sub>) δ (ppm)** 6.27 (1H, s, H<sub>1</sub>); 5.88 – 5.78 (1H, m, H<sub>12</sub>); 5.03 – 4.93 (2H, m, H<sub>13</sub>); 4.44 (2H, s, H<sub>3</sub>); 3.48 (2H, t, J = 6.7, 0.9 Hz, H<sub>4</sub>); 2.08 – 2.03 (2H, t, J = 6.9 Hz, H<sub>11</sub>); 1.64 – 1.56 (2H, m, J = 6.9 Hz, H<sub>5</sub>); 1.39 – 1.29 (10H, m, J = 6.9 Hz, H<sub>6,7,8,9,10</sub>).

**<sup>13</sup>C-NMR (100 MHz, CDCl<sub>3</sub>) δ (ppm)** 152.3 (C<sub>2</sub>); 139.2 (C<sub>12</sub>); 114.1 (C<sub>13</sub>); 109.6 (C<sub>1</sub>); 70.5 (C<sub>3</sub>); 64.9 (C<sub>4</sub>); 33.8 (C<sub>11</sub>); 29.6 (C<sub>5</sub>); 29.4 (C<sub>8</sub>); 29.1 (C<sub>9</sub>); 28.9 (C<sub>10</sub>); 26.1 (C<sub>7</sub>), 25.7 (C<sub>6</sub>).

## Synthesis of di(dec-9-en-1-yl) furan-2,5-dicarboxylate (*Dec-FDE*)

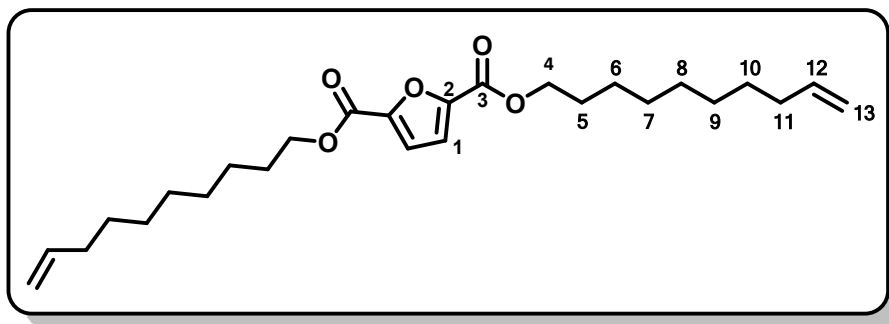

*Dec-FDE* was prepared using a previously published procedure.<sup>2</sup>

**<sup>1</sup>H NMR (400 MHz, CDCl<sub>3</sub>) δ (ppm)** 7.21 (1H, s, H<sub>1</sub>); 5.83 (1H, m, H<sub>12</sub>); 5.01 (1H, d, H<sub>13</sub>); 4.95 (1H, d, H<sub>13</sub>); 4.35 (2H, t, J = 6.9 Hz, H<sub>4</sub>); 2.06 (2H, m, H<sub>11</sub>); 1.78 (2H, m, H<sub>5</sub>); 1.37 (10H, m, H<sub>6,7,8,9,10</sub>).

**<sup>13</sup>C NMR (101 MHz, CDCl<sub>3</sub>) δ (ppm)** 158.2 (C<sub>3</sub>); 147.0 (C<sub>2</sub>); 139.2 (C<sub>12</sub>); 118.2 (C<sub>1</sub>); 114.2 (C<sub>13</sub>); 65.7 (C<sub>4</sub>); 33.8 (C<sub>11</sub>); 29.3 (C<sub>5</sub>); 29.2 (C<sub>8</sub>); 29.0 (C<sub>9</sub>); 28.9 (C<sub>10</sub>); 28.6 (C<sub>7</sub>); 25.8 (C<sub>6</sub>).

**Table S1. Optimization of furan-based  $\alpha,\omega$ -diene carbonate monomers.**

(x = 1, 2, 4 and 8)

|                        |                        |                        |                        |
|------------------------|------------------------|------------------------|------------------------|
| <i>All</i> -BACF x = 1 | <i>Hex</i> -BACF x = 4 | <i>All</i> -MACF x = 1 | <i>Hex</i> -MACF x = 4 |
| <i>But</i> -BACF x = 2 | <i>Dec</i> -BACF x = 8 | <i>But</i> -MACF x = 2 | <i>Dec</i> -MACF x = 8 |

| #  | BHMF (g) | DAC                   | DAC (eq. mol) | Cat. (% mol) | T (°C) | t (h) | Selectivity <sup>a</sup> |                       | Yield (%) <sup>b</sup> |
|----|----------|-----------------------|---------------|--------------|--------|-------|--------------------------|-----------------------|------------------------|
|    |          |                       |               |              |        |       | x-BACF (%)               | x-MACF (%)            |                        |
| 1  | 1.00     | <i>All</i> -Carbonate | 5.00          | 1.00         | 95     | 2     | <i>All</i> -BACF (74)    | <i>All</i> -MACF (26) | 60 <sup>c</sup>        |
| 2  | 1.00     | <i>All</i> -Carbonate | 10.00         | 1.00         | 95     | 2     | <i>All</i> -BACF (100)   | -                     | 83                     |
| 3  | 0.50     | <i>But</i> -Carbonate | 10.00         | 1.00         | 110    | 2     | <i>But</i> -BACF (34)    | <i>But</i> -MACF (64) | 15 <sup>d</sup>        |
| 4  | 0.50     | <i>But</i> -Carbonate | 10.00         | 5.00         | 110    | 2     | <i>But</i> -BACF (100)   | -                     | 76                     |
| 5  | 0.50     | <i>But</i> -Carbonate | 10.00         | 10.00        | 110    | 2     | <i>But</i> -BACF (100)   | -                     | 75                     |
| 6  | 0.50     | <i>But</i> -Carbonate | 2.50          | 5.00         | 110    | 2     | <i>But</i> -BACF (100)   | -                     | 54                     |
| 7  | 0.50     | <i>But</i> -Carbonate | 5.00          | 5.00         | 110    | 2     | <i>But</i> -BACF (100)   | -                     | 79                     |
| 8  | 0.50     | <i>But</i> -Carbonate | 10.00         | 5.00         | 110    | 2     | <i>But</i> -BACF (100)   | -                     | 76                     |
| 9  | 0.20     | <i>Hex</i> -Carbonate | 5.00          | 5.00         | 120    | 4     | <i>Hex</i> -BACF (45)    | <i>Hex</i> -MACF (55) | 16 <sup>c</sup>        |
| 10 | 0.20     | <i>Hex</i> -Carbonate | 5.00          | 5.00         | 140    | 3     | <i>Hex</i> -BACF (55)    | <i>Hex</i> -MACF (45) | 19 <sup>c</sup>        |
| 11 | 0.20     | <i>Hex</i> -Carbonate | 5.00          | 5.00         | 140    | 3     | <i>Hex</i> -BACF (55)    | <i>Hex</i> -MACF (45) | 19 <sup>c</sup>        |
| 12 | 0.20     | <i>Hex</i> -Carbonate | 5.00          | 10.00        | 140    | 3     | <i>Hex</i> -BACF (100)   | -                     | 29 <sup>c</sup>        |
| 13 | 0.20     | <i>Hex</i> -Carbonate | 5.00          | 20.00        | 140    | 3     | <i>Hex</i> -BACF (100)   | -                     | 44 <sup>c</sup>        |
| 14 | 0.20     | <i>Hex</i> -Carbonate | 5.00          | 50.00        | 140    | 2.5   | <i>Hex</i> -BACF (100)   | -                     | 41 <sup>c</sup>        |
| 15 | 0.20     | <i>Hex</i> -Carbonate | 5.00          | 20.00        | 140    | 3     | <i>Hex</i> -BACF (100)   | -                     | 44 <sup>c</sup>        |
| 16 | 0.20     | <i>Hex</i> -Carbonate | 10.00         | 20.00        | 140    | 3     | <i>Hex</i> -BACF (100)   | -                     | 69 <sup>c</sup>        |
| 17 | 0.20     | <i>Dec</i> -Carbonate | 5.00          | 5.00         | 110    | 2     | <i>Dec</i> -BACF (100)   | -                     | 14 <sup>c</sup>        |
| 18 | 0.20     | <i>Dec</i> -Carbonate | 5.00          | 5.00         | 140    | 3     | <i>Dec</i> -BACF (100)   | -                     | 44 <sup>c</sup>        |

**Reaction conditions:** BHMF and an excess of Diene-carbonate (DAC) is reacted in the presence of TBD at a certain temperature. The reaction was monitored by TLC until it reached full conversion; <sup>a</sup> Selectivity was calculated using <sup>1</sup>H NMR, where x-BACF stands for a generic bis(alkylcarbonate)furans and x-MACF for mono(alkylcarbonate)furans; thus for specific monomers *All* = Allyl, *But* = Butenyl, *Hex* = Hexenyl, *Dec* = Decenyl. <sup>b</sup> Reported isolated yield. <sup>c</sup> Product isolated via column chromatography. <sup>d</sup> Yield calculated using <sup>1</sup>H NMR.

**Table S2. Gram-scale furan-based  $\alpha,\omega$ -diene carbonate monomers.**

| # | BHMF (g) | DAC                   | DAC (eq. mol) | Cat. (% mol) | T (°C) | t (h) | Selectivity <sup>a</sup> |        | Yield <sup>b</sup> (%) |
|---|----------|-----------------------|---------------|--------------|--------|-------|--------------------------|--------|------------------------|
|   |          |                       |               |              |        |       | x-BACF                   | x-MACF |                        |
| 1 | 1.00     | <i>All</i> -Carbonate | 10.00         | 1.00         | 95     | 2     | <i>All</i> -BACF (100)   | -      | 83                     |
| 2 | 0.50     | <i>But</i> -Carbonate | 5.00          | 5.00         | 110    | 2     | <i>But</i> -BACF (100)   | -      | 79                     |
| 3 | 1.00     | <i>But</i> -Carbonate | 5.00          | 5.00         | 110    | 2     | <i>But</i> -BACF (100)   | -      | 75                     |
| 4 | 0.50     | <i>Hex</i> -Carbonate | 10.00         | 20.00        | 140    | 3     | <i>Hex</i> -BACF (100)   | -      | 74 <sup>c</sup>        |
| 5 | 1.00     | <i>Hex</i> -Carbonate | 10.00         | 20.00        | 140    | 3     | <i>Hex</i> -BACF (100)   | -      | 61 <sup>c</sup>        |

**Reaction conditions:** BHMF and an excess of carbonate is reacted in the presence of TBD at a certain temperature. The reaction was monitored by TLC until it reached full conversion. <sup>a</sup> Selectivity was calculated using <sup>1</sup>H NMR. <sup>b</sup> Reported isolated yield. <sup>c</sup> Product isolated via column chromatography.

## Homo-Polymer synthesis

**Solvent free ADMET polymerisation of homopolymers general procedure:** In a 25 mL Schleck flask, the chosen monomer (0.10 g) was combined with p-benzoquinone (3.00 eq. mol relative to the catalyst). The flask underwent 3 cycles of 15 minutes vacuum followed by N<sub>2</sub> purging. Upon completion of the purge, the appropriate catalyst amount was introduced along with a magnetic stirrer. The flask was then positioned in a pre-heated Drysyn at 80 °C and subjected to vacuum (25 mbar). To monitor reaction progress, samples were taken at various time points, dissolved in CDCl<sub>3</sub>, and examined via <sup>1</sup>H NMR. The reaction was terminated using an ethyl vinyl ether/THF solution (1:9) for 1 hour. Subsequently, the crude product was precipitated in cold methanol. The precipitated product was separated based on the formed polymer's state.

For low molecular weight, sticky polymers, a minimal amount of a low boiling point solvent (acetone or CH<sub>2</sub>Cl<sub>2</sub>) was utilized to recover the product. Solid polymers were filtered and washed with cold methanol. Both polymer types were then dried under vacuum for 24 hours.

### But-BACF derived homo-polymer (P(*But*-BACF))

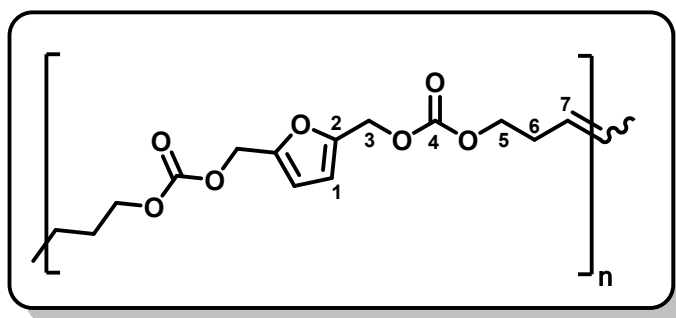

<sup>1</sup>H NMR (300 MHz, CDCl<sub>3</sub>)  $\delta$  (ppm) 6.41 (1H, s, H<sub>1</sub>); 5.50 (1H, td, J = 3.8, 1.9 Hz, H<sub>7</sub>); 5.07 (2H, s, H<sub>3</sub>); 4.14 (2H, t, J = 6.8 Hz, H<sub>5</sub>); 2.38 (2H, dt, J = 16.2, 6.1 Hz, H<sub>6</sub>).

$^{13}\text{C}$  NMR (75 MHz,  $\text{CDCl}_3$ )  $\delta$  (ppm) 154.8 ( $\text{C}_4$ ); 149.7 ( $\text{C}_2$ ); 128.1 ( $\text{C}_7$ ); 112.1 ( $\text{C}_1$ ); 67.5 ( $\text{C}_5$ ); 61.1 ( $\text{C}_3$ ); 31.9 ( $\text{C}_6$ ).

Hex-BACF derived homo-polymer (P(Hex-BACF))

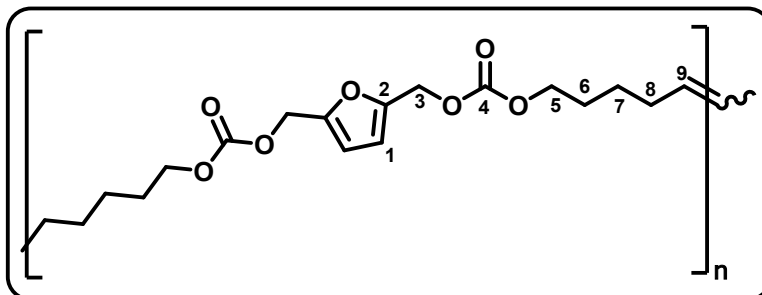

$^1\text{H}$  NMR (300 MHz,  $\text{CDCl}_3$ )  $\delta$  (ppm) 6.17 (1H, d,  $J = 0.9$  Hz,  $\text{H}_1$ ); 5.39 – 5.19 (1H, m,  $\text{H}_9$ ), 4.33 (2H, s,  $\text{H}_3$ ); 3.38 (2H, t,  $J = 6.6$  Hz,  $\text{H}_5$ ); 1.92 (2H, dq,  $J = 18.7, 6.7, 6.1$  Hz,  $\text{H}_8$ ); 1.51 (2H, ddd,  $J = 14.9, 8.8, 4.4$  Hz,  $\text{H}_6$ ); 1.37 – 1.20 (2H, m,  $\text{H}_7$ ).

$^{13}\text{C}$  NMR (75 MHz,  $\text{CDCl}_3$ )  $\delta$  (ppm) 152.3 ( $\text{C}_4$ ); 130.3 ( $\text{C}_2$ ); 129.5 ( $\text{C}_9$ ); 109.6 ( $\text{C}_1$ ); 70.3 ( $\text{C}_5$ ); 64.9 ( $\text{C}_3$ ); 32.3 ( $\text{C}_8$ ); 29.1 ( $\text{C}_6$ ); 26.0 ( $\text{C}_7$ ).

Dec-BACF derived homo-polymer (P(Dec-BACF))

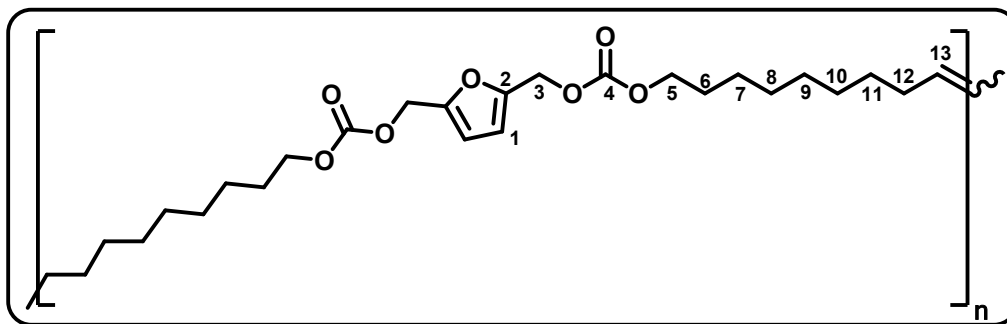

$^1\text{H}$  NMR (300 MHz,  $\text{CDCl}_3$ )  $\delta$  (ppm) 6.34 (1H, s,  $\text{H}_1$ ); 5.40 – 5.21 (1H, m,  $\text{H}_{13}$ ); 5.00 (2H, s,  $\text{H}_3$ ); 4.07 (2H, t,  $J = 6.7$  Hz,  $\text{H}_5$ ); 1.88 (2H, d,  $J = 6.2$  Hz,  $\text{H}_{12}$ ); 1.71 – 1.42 (2H, m,  $\text{H}_6$ ); 1.23 (10H, d,  $J = 9.4$  Hz,  $\text{H}_{7-11}$ ).



<sup>13</sup>C NMR (75 MHz, CDCl<sub>3</sub>)  $\delta$  (ppm) 154.9 (C<sub>4</sub>); 149.8 (C<sub>2</sub>); 130.3 (C<sub>13</sub>); 112.0 (C<sub>1</sub>); 68.5 (C<sub>5</sub>); 61.0 (C<sub>3</sub>); 32.6 (C<sub>12</sub>); 29.6 (C<sub>11</sub>); 29.3 (C<sub>10</sub>); 29.2 (C<sub>9</sub>); 29.1 (C<sub>8</sub>); 28.6 (C<sub>6</sub>); 25.6 (C<sub>7</sub>).

**Table S3- Catalyst loading for the homo-polymerization of *But*-BACF via ADMET Polymerization.**

| # | Catalyst | Cat. (%mol) | Conv. <sup>a</sup> (%) | M <sub>n</sub> <sup>b</sup> (Kda) | $\mathcal{D}$ <sup>c</sup> | T <sub>d5%</sub> <sup>d</sup> (°C) | T <sub>g</sub> <sup>e</sup> (°C) |
|---|----------|-------------|------------------------|-----------------------------------|----------------------------|------------------------------------|----------------------------------|
| 1 | C4       | 0.50        | 100                    | 4.4                               | 1.6                        | 175                                | -34                              |
| 2 |          | 1.00        | 100                    | 13.0                              | 1.4                        | 159                                | -8                               |
| 3 |          | 2.00        | 100                    | 6.3                               | 1.9                        | 162                                | -17                              |
| 4 |          | 10.00       | 100                    | 3.9                               | 1.4                        | 132                                | -24                              |

**Reaction conditions:** 100 mg of *But*-BACF was added to a Schlenk flask in the presence of second-generation Hoveyda–Grubbs catalyst (C4) and 1,4-benzoquinone (3.00 eq. mol compared to catalyst) at 80 °C under 25 mbar of vacuum for 24 hours; <sup>a</sup> Conversion was calculated through <sup>1</sup>H NMR; <sup>b</sup> Determined by SEC in THF (10 mM LiBr) at 50 °C; <sup>c</sup>  $\mathcal{D}$  = dispersity; <sup>d</sup> TGA degradation temperatures at which 5% mass loss (T<sub>d5%</sub>) was observed under nitrogen; <sup>e</sup> Glass transition temperature (T<sub>g</sub>) determined by DSC, temperature ramp 10 °C min<sup>-1</sup>.

**Table S4- Homo-polymerization results of different furan-based  $\alpha,\omega$ -diene monomers.**

| # | Monomer          | Catalyst (%mol) | T (°C) | t (h) | Conv. <sup>a</sup> (%) | Yield <sup>b</sup> (%) | M <sub>n</sub> <sup>c</sup> (Kda) | $\mathcal{D}$ <sup>d</sup> | T <sub>d5%</sub> <sup>e</sup> (°C) | T <sub>g</sub> <sup>f</sup> (°C) | T <sub>c</sub> <sup>g</sup> (°C) | T <sub>m</sub> <sup>h</sup> (°C) | Ref.         |
|---|------------------|-----------------|--------|-------|------------------------|------------------------|-----------------------------------|----------------------------|------------------------------------|----------------------------------|----------------------------------|----------------------------------|--------------|
| 1 | <i>Dec</i> -BDMF | C4 (1.00)       | 80     | 2     | 100                    | -                      | 9.5                               | 1.8                        | 257                                | -53                              | 4.2                              | 21                               | <sup>1</sup> |
| 2 | <i>Dec</i> -FDE  | C4 (1.00)       | 80     | 0.5   | 100                    | 86                     | 26.4                              | 2.48                       | 257                                | -31                              | -                                | 70                               | <sup>2</sup> |
| 3 | <i>Dec</i> -BACF | C4 (1.00)       | 80     | 0.5   | 100                    | 85                     | 19.0                              | 2.3                        | 244                                | -36                              | -20                              | 0                                | This work    |

**Reaction conditions:** Monomer was added to a Schlenk flask in the presence of second-generation Hoveyda–Grubbs catalyst (C4) and 1,4-benzoquinone (3.00 eq. mol compared to catalyst) at 80 °C under 25 mbar of vacuum until it reached full conversion; <sup>a</sup> Conversion was calculated through <sup>1</sup>H NMR; <sup>b</sup> Isolated yield after purification and drying, yield = (isolated mass/theoretical mass) × 100. <sup>c</sup> Determined by SEC in THF (10 mM LiBr) at 50 °C; <sup>d</sup>  $\mathcal{D}$  = dispersity; <sup>e</sup> TGA degradation temperatures at which 5% mass loss (T<sub>d5%</sub>) was observed under nitrogen; <sup>f</sup> Glass transition temperature (T<sub>g</sub>) determined by DSC, temperature ramp 10 °C min<sup>-1</sup>; <sup>g</sup> T<sub>c</sub> was determined by DSC and it stands for crystallization temperature; <sup>h</sup> T<sub>m</sub> was determined by DSC and it stands for melting temperature.

## Co-Polymer synthesis

**Solvent free ADMET polymerisation of co-polymers general procedure:** Two distinct monomers were combined in a 1:1 molar ratio, totalling 0.40 mmol. Subsequently, 1.29 mg of *p*-benzoquinone (3.00 molar equivalents relative to the catalyst) was introduced. The mixture underwent purging through 3 cycles of 15-minute vacuum followed by N<sub>2</sub>. Upon completion of the purge, the appropriate quantity of C4 (2.50 mg, 1.00% mol) was added, along with a magnetic stirrer. The flask was then placed in a pre-heated Drysyn set at 80 °C and subjected to vacuum (25 mbar). To monitor reaction progress, samples were extracted at various time intervals, dissolved in CDCl<sub>3</sub>, and examined via <sup>1</sup>H NMR. The reaction was terminated using a solution of Ethyl Vinyl Ether/THF (1:9) for 1 hour. The resulting crude product was precipitated in cold methanol. The final purified polymer was isolated following the same procedure as described for solvent-free polymerization.

### P(*Dec*-BACF: *Dec*-FDE) (1:1) co-polymer

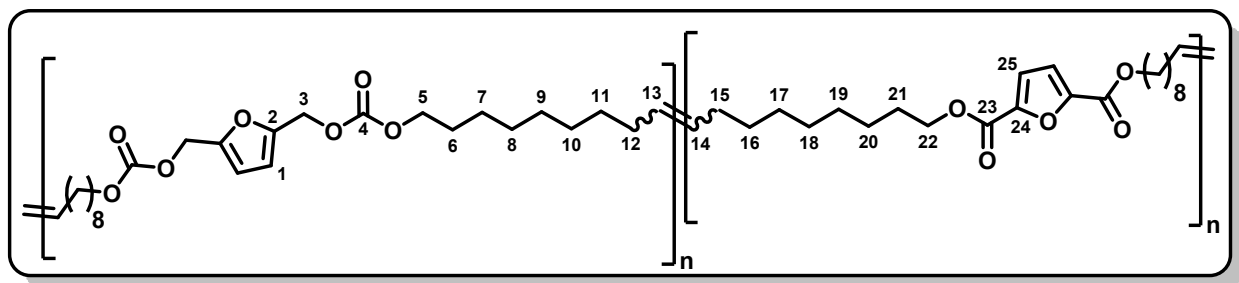

<sup>1</sup>H NMR (300 MHz, CDCl<sub>3</sub>) δ (ppm) 7.11 (1H, s, H<sub>25</sub>); 6.34 (1H, s, H<sub>1</sub>); 5.35 – 5.22 (2H, m, H<sub>13,14</sub>); 5.00 (2H, s, H<sub>3</sub>); 4.25 (2H, t, *J* = 6.8 Hz, H<sub>22</sub>); 4.07 (2H, t, *J* = 6.8 Hz, H<sub>5</sub>); 1.89 (4H, s, H<sub>12,15</sub>); 1.76 – 1.48 (4H, m, H<sub>6,21</sub>); 1.36 – 1.18 (20H, m, H<sub>7-11,16-20</sub>).

**$^{13}\text{C}$  NMR (75 MHz,  $\text{CDCl}_3$ )  $\delta$  (ppm)** 158.2 ( $\text{C}_{23}$ ); 154.9 ( $\text{C}_4$ ); 149.8 ( $\text{C}_{24}$ ); 147.0 ( $\text{C}_1$ ); 130.3 - 129.8 ( $\text{C}_{13, 14}$ ); 118.2 ( $\text{C}_{25}$ ); 112.0 ( $\text{C}_1$ ); 68.5 ( $\text{C}_5$ ); 65.7 ( $\text{C}_3$ ); 61.1 ( $\text{C}_{22}$ ); 32.6 ( $\text{C}_{12-15}$ ); 29.7 - 29.1 ( $\text{C}_{9,10, 17, 18}$ ); 28.6- 27.2 ( $\text{C}_{8,19}$ ); 25.8 ( $\text{C}_7$ ); 25.7 ( $\text{C}_{20}$ ).

**P(Dec-BDMF: Dec-BACF) (1:1) co-polymer**

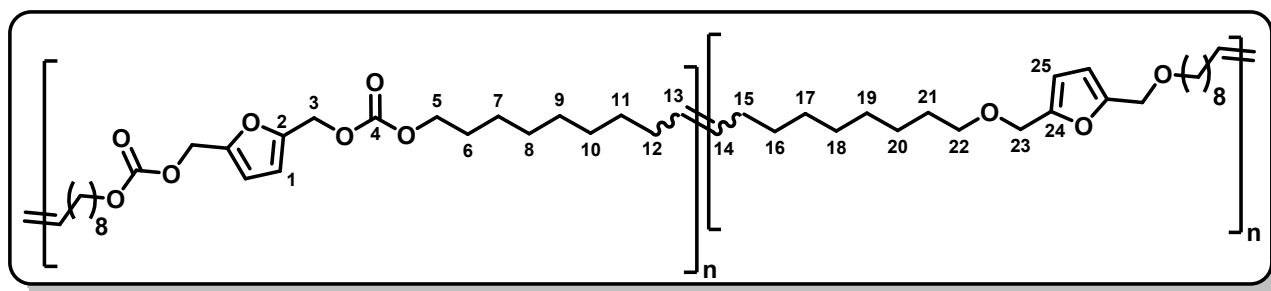

**$^1\text{H}$  NMR (300 MHz,  $\text{CDCl}_3$ )  $\delta$  (ppm)** 6.34 (1H, s,  $\text{H}_1$ ); 6.17 (1H, s,  $\text{H}_{25}$ ); 5.38 – 5.21 (2H, m,  $\text{H}_{13-14}$ ); 5.00 (2H, s,  $\text{H}_3$ ); 4.34 (2H, s,  $\text{H}_{23}$ ); 4.07 (2H, t,  $J = 6.7$  Hz,  $\text{H}_5$ ); 3.38 (2H, t,  $J = 6.7$  Hz,  $\text{H}_{22}$ ); 1.88 (4H, d,  $J = 7.4$  Hz,  $\text{H}_{12-16}$ ); 1.65 – 1.51 (4H, m,  $\text{H}_{6, 21}$ ); 1.21 (20H, s,  $\text{H}_{7-11; 16-20}$ ).

**$^{13}\text{C}$  NMR (75 MHz,  $\text{CDCl}_3$ )  $\delta$  (ppm)** 154.9 ( $\text{C}_4$ ); 152.3 ( $\text{C}_{24}$ ); 149.8 ( $\text{C}_1$ ); 130.3 ( $\text{C}_{13, 14}$ ); 112.0/109.7 ( $\text{C}_{1, 25}$ ); 70.5 ( $\text{C}_{23}$ ); 68.5 ( $\text{C}_5$ ); 64.9 ( $\text{C}_3$ ); 32.6 ( $\text{C}_{12, 15}$ ); 29.6 - 28.6 ( $\text{C}_{8-10, 17-19}$ ); 26.1 ( $\text{C}_6$ ); 25.7 ( $\text{C}_7$ ).

**P(Dec-BDMF: Dec-FDE) (1:1) co-polymer**

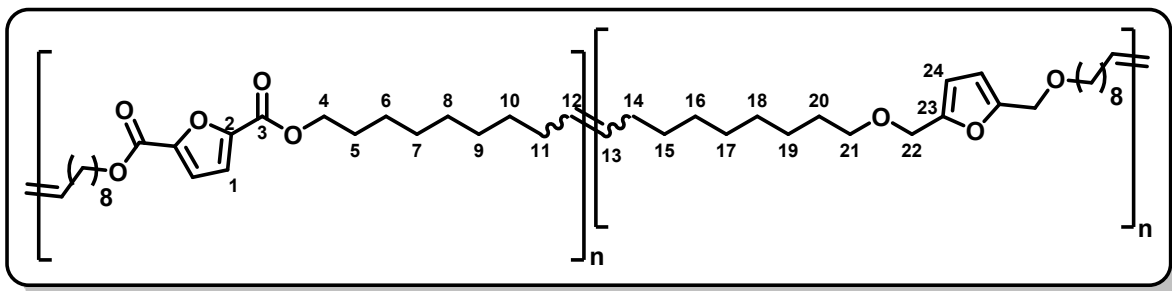

**$^1\text{H}$  NMR (300 MHz,  $\text{CDCl}_3$ )  $\delta$  (ppm)** 7.18 (1H, s,  $\text{H}_1$ ); 6.24 (1H, s,  $\text{H}_{24}$ ); 5.43 – 5.29 (2H, m,  $\text{H}_{12-13}$ ); 4.41 (2H, s,  $\text{H}_{22}$ ); 4.32 (2H, t,  $J = 6.8$  Hz,  $\text{H}_4$ ); 3.45 (2H, t,  $J = 6.7$  Hz,  $\text{H}_{21}$ ); 1.98 (4H, d,  $J = 17.4$  Hz,  $\text{H}_{11, 14}$ ); 1.75 (2H, t,  $J = 7.2$  Hz,  $\text{H}_5$ ); 1.56 (4H, dd,  $J = 13.7, 6.6$  Hz,  $\text{H}_{6, 20}$ ); 1.40 – 1.18 (20H, m,  $\text{H}_{6-10, \text{H}_{15-19}}$ ).

**$^{13}\text{C}$  NMR (75 MHz,  $\text{CDCl}_3$ )  $\delta$  (ppm)** 158.2 ( $\text{C}_3$ ); 152.3 ( $\text{C}_{23}$ ); 147.0 ( $\text{C}_2$ ); 130.3 ( $\text{C}_{12, 13}$ ); 118.2 ( $\text{C}_1$ ); 109.6 ( $\text{C}_{24}$ ); 70.5 ( $\text{C}_{22}$ ); 65.7 ( $\text{C}_{21}$ ); 64.9 ( $\text{C}_4$ ); 32.6 ( $\text{C}_{11, 14}$ ); 29.6 ( $\text{C}_5$ ); 29.6 ( $\text{C}_{15}$ ); 29.4 ( $\text{C}_{10}$ ); 29.4 - 29.1 ( $\text{C}_{8,9,16, 17}$ ); 28.6 ( $\text{C}_{20}$ ); 26.1 ( $\text{C}_{19}$ ); 25.8 ( $\text{C}_6$ ).

**P(Dec-FDE: But-BACF) (1:1) co-polymer**

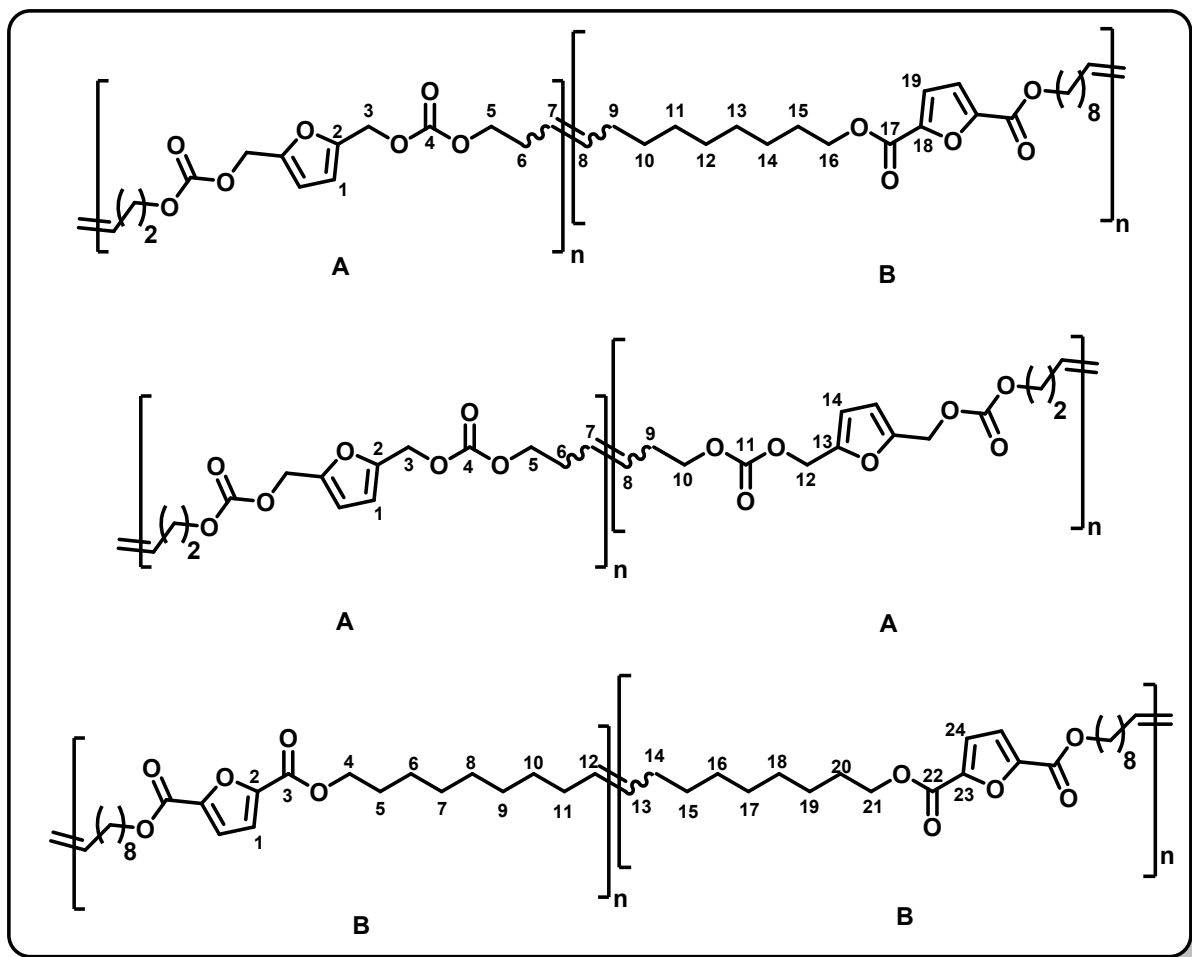

**<sup>1</sup>H NMR (300 MHz, CDCl<sub>3</sub>) δ (ppm)** 7.11 (1H, s, H<sub>19</sub>); 6.34 (1H, s, H<sub>1</sub>); 5.54 – 5.37 (1H, m, H<sub>7</sub>); 5.37 – 5.20 (1H, m, H<sub>8</sub>); 5.00 (2H s, H<sub>3</sub>); 4.25 (2H, t, *J* = 6.8 Hz, H<sub>16</sub>); 4.13 – 3.96 (2H, m, H<sub>5</sub>); 2.44 – 2.16 (2H, m, H<sub>6</sub>); 1.90 (2H, d, *J* = 6.7 Hz, H<sub>9</sub>); 1.69 (2H, q, *J* = 7.0 Hz, H<sub>15</sub>); 1.53 (2H, s, H<sub>14</sub>); 1.25 (8H, d, *J* = 16.2 Hz, H<sub>10-13</sub>).

**<sup>13</sup>C NMR (75 MHz, CDCl<sub>3</sub>) δ (ppm)** 158.2 (C<sub>17</sub>); 154.8 (C<sub>4</sub>); 149.7 (C<sub>18</sub>); 147.0 (C<sub>2</sub>); 134.0 (C<sub>8(AB)</sub>); 130.3 (C<sub>7(AB)</sub>); 128.1 (C<sub>12, 13 (BB)</sub>); 124.3 (C<sub>7, 8 (AA)</sub>); 118.2 (C<sub>19</sub>), 112.1 (C<sub>1</sub>), 67.5 (C<sub>5</sub>); 65.7 (C<sub>3</sub>); 61.1 (C<sub>16</sub>); 32.6 (C<sub>9</sub>); 31.9 (C<sub>15</sub>); 29.6 - 28.6 (C<sub>10-13</sub>); 25.8 (C<sub>14</sub>).

# $^1\text{H}$ NMR and $^{13}\text{C}$ NMR spectra

## Diallyl carbonate

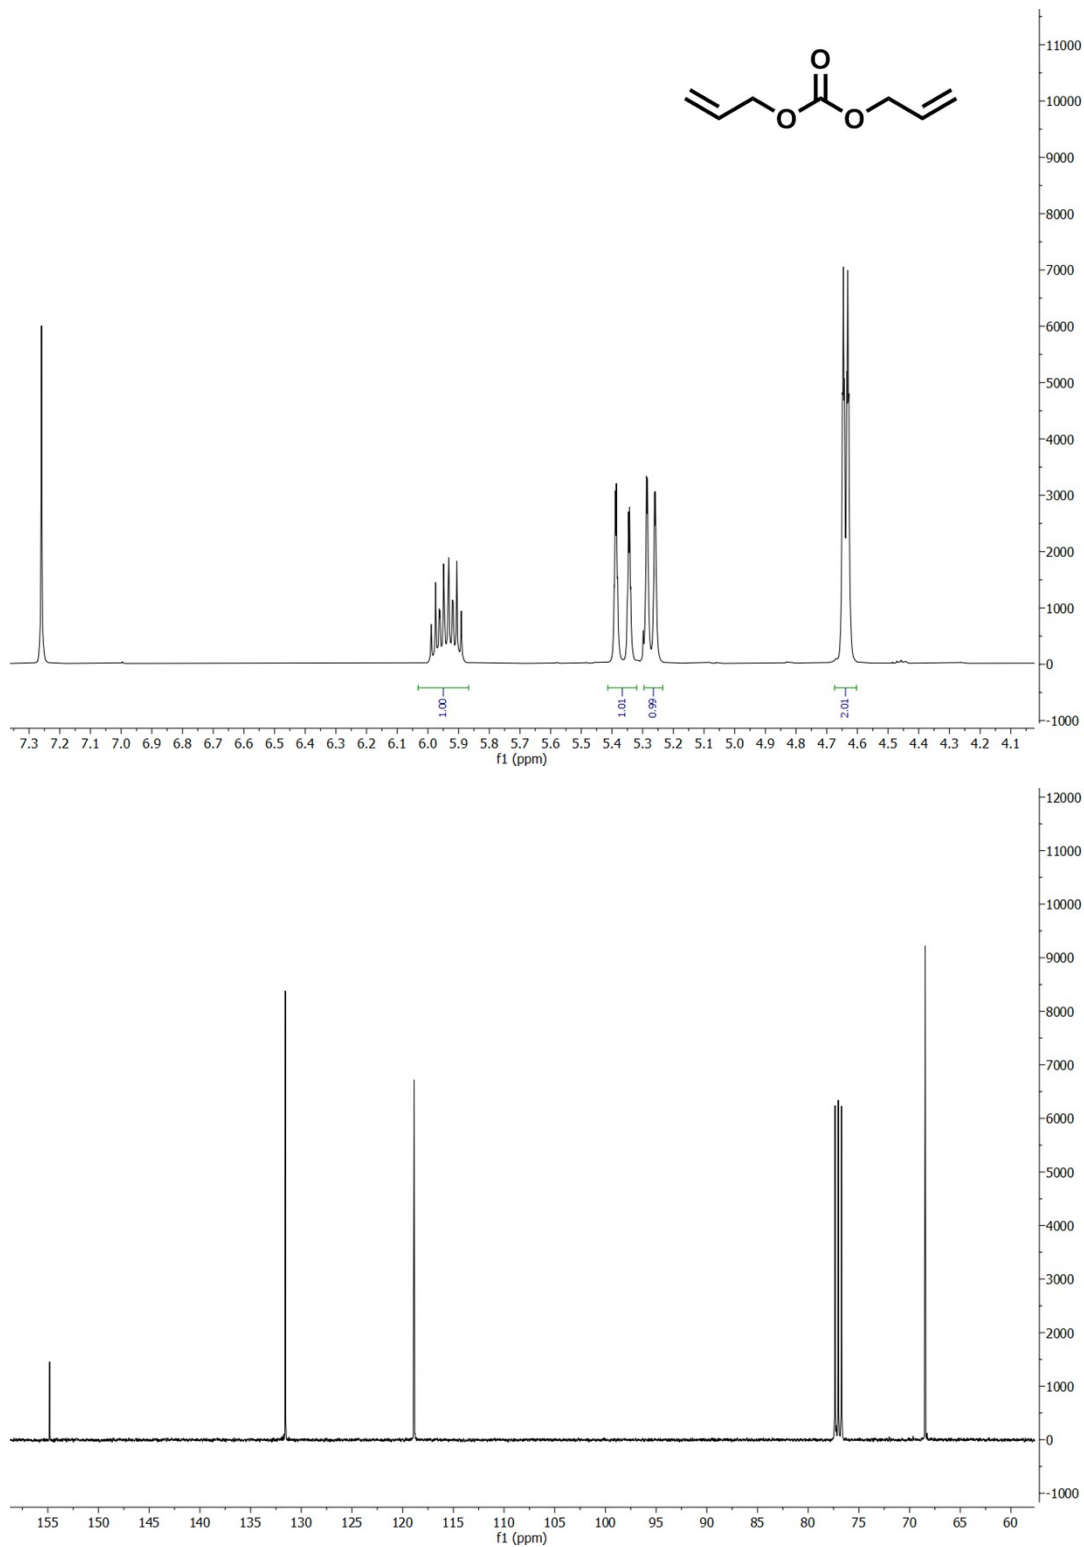

Figure S1- (top)  $^1\text{H}$  NMR spectra of *All*-Carbonate in  $\text{CDCl}_3$ ; (bottom)  $^{13}\text{C}$  NMR spectra of *All*-Carbonate in  $\text{CDCl}_3$ .

Di(but-3-en-1-yl) carbonate

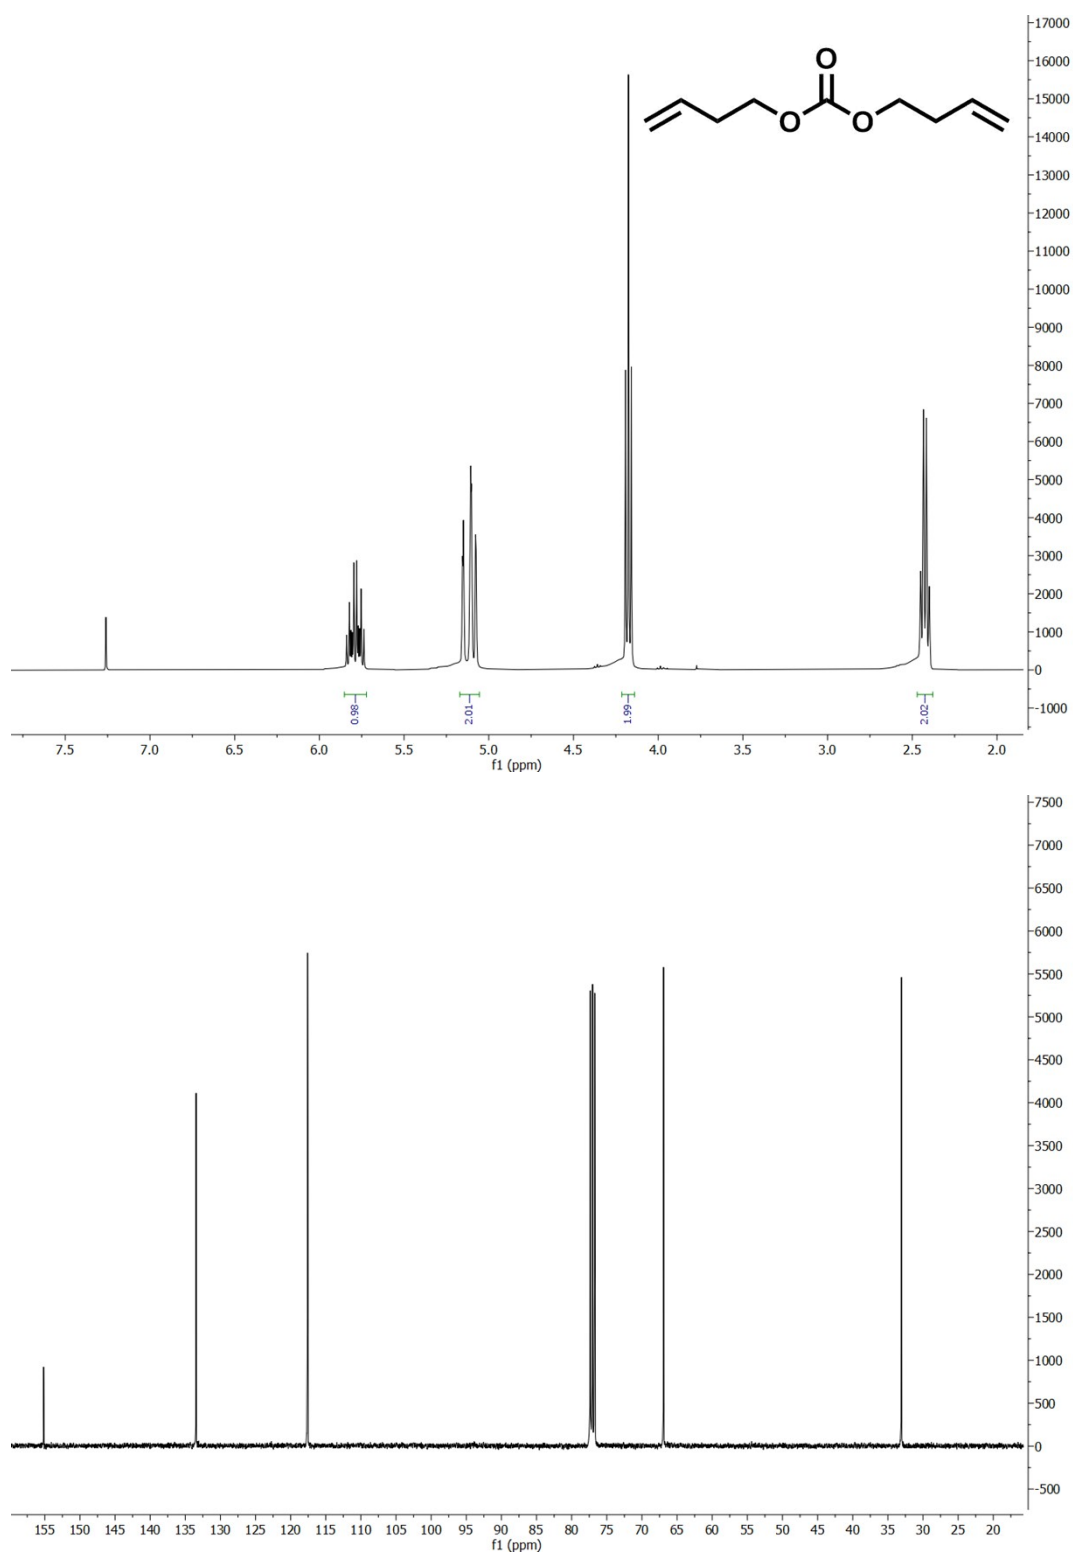

Figure S2- (top) <sup>1</sup>H NMR spectra of *But*-Carbonate in CDCl<sub>3</sub>; (bottom) <sup>13</sup>C NMR spectra of *But*-Carbonate in CDCl<sub>3</sub>.

# Di(hex-5-en-1-yl) carbonate

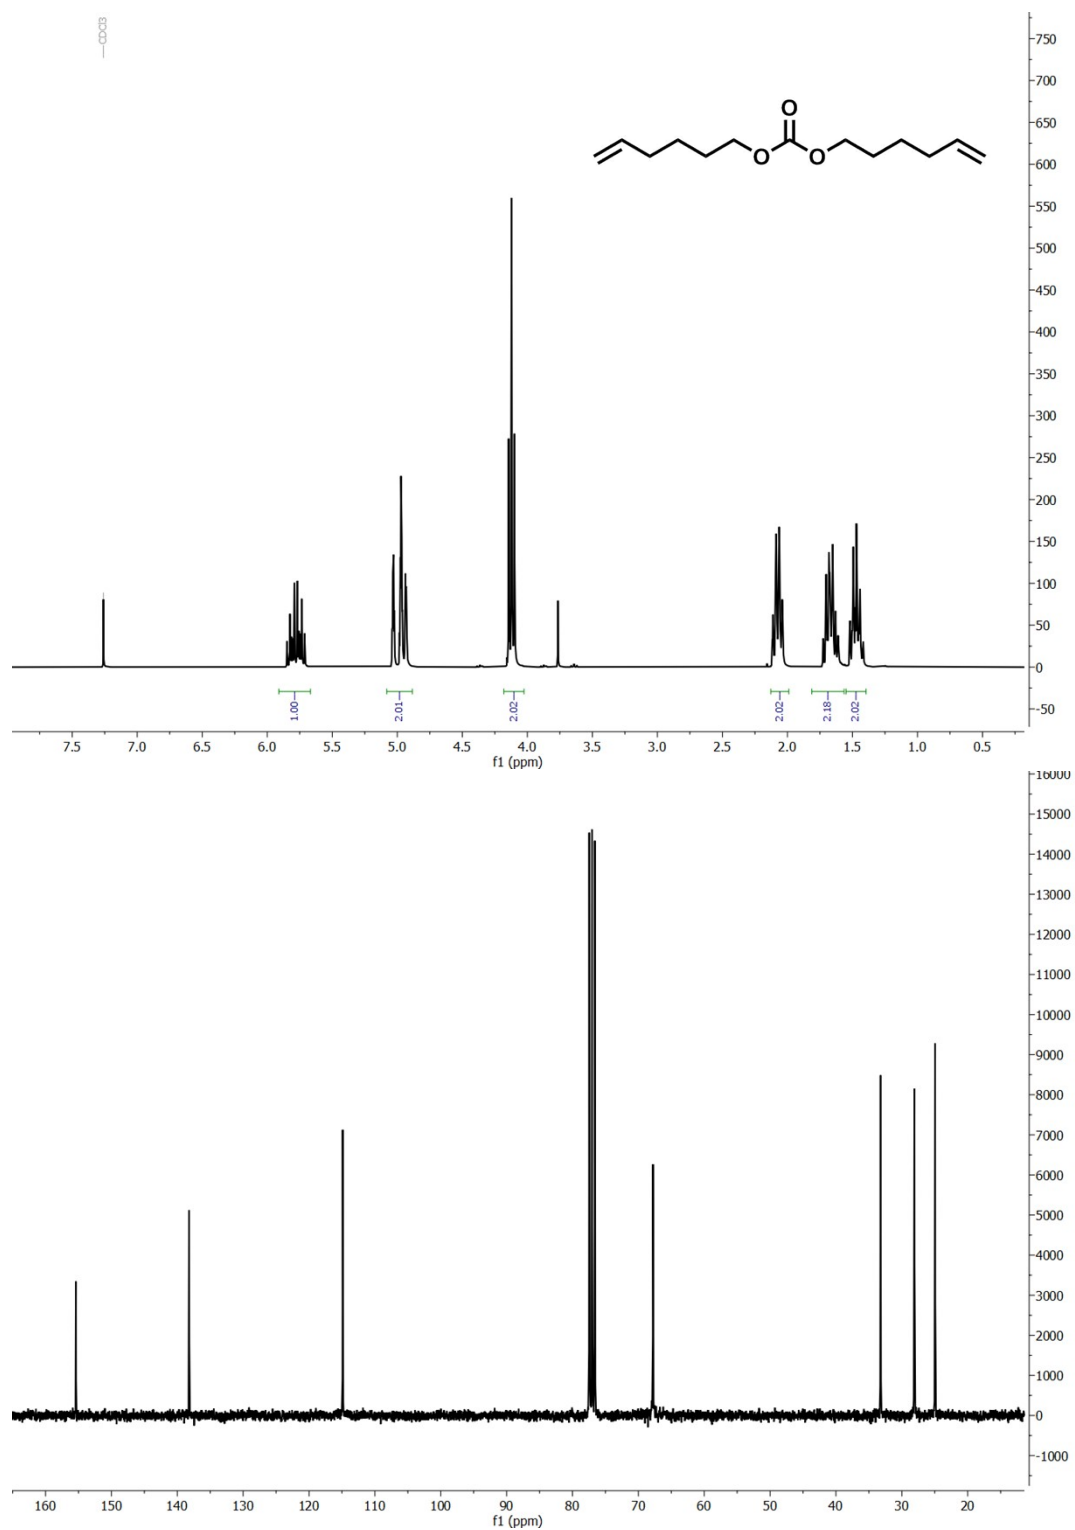

Figure S3- (top) <sup>1</sup>H NMR spectra of Hex-Carbonate in CDCl<sub>3</sub>; (bottom) <sup>13</sup>C NMR spectra of Hex-Carbonate in CDCl<sub>3</sub>.



# Di(dec-9-en-1-yl) carbonate

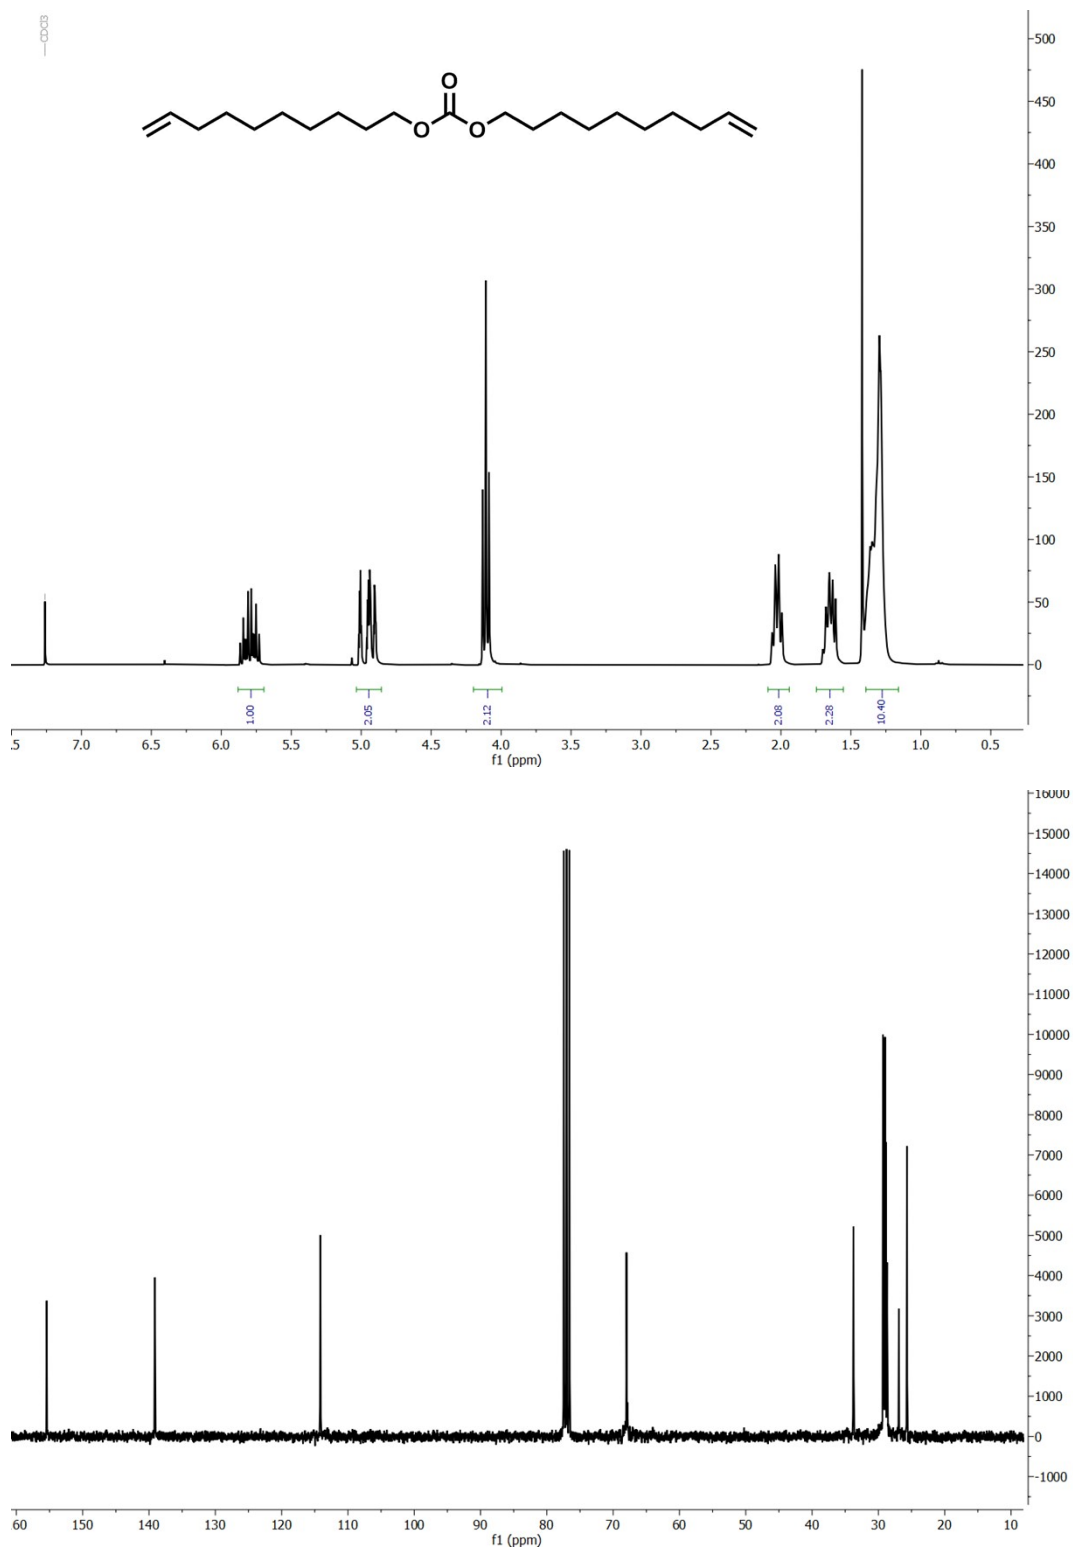

Figure S4- (top) <sup>1</sup>H NMR spectra of *Dec*-Carbonate in CDCl<sub>3</sub>; (bottom) <sup>13</sup>C NMR spectra of *Dec*-Carbonate in CDCl<sub>3</sub>.

Diallyl (furan-2,5-diylbis(methylene)) bis(carbonate) (*A//*-BACF)

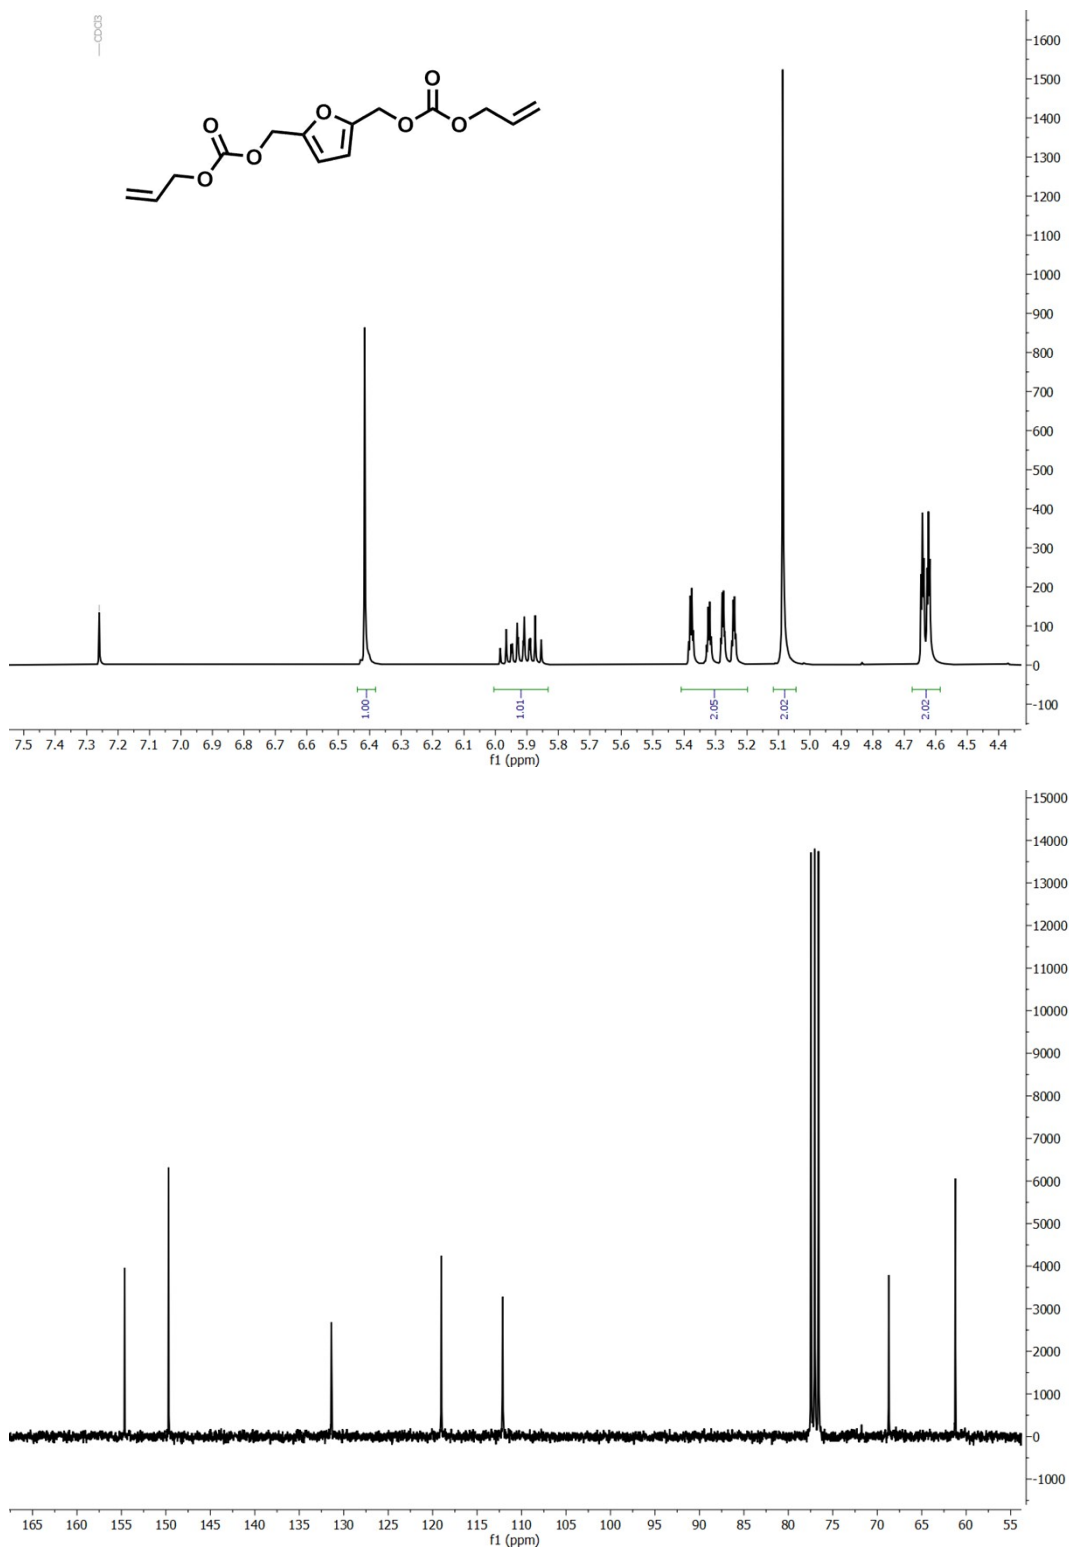

Figure S5- (top) <sup>1</sup>H NMR spectra of *A//*-BACF in CDCl<sub>3</sub>; (bottom) <sup>13</sup>C NMR spectra of *A//*-BACF in CDCl<sub>3</sub>.

**Di(but-3-en-1-yl) (furan-2,5-diylbis(methylene)) bis(carbonate) (*But-BACF*)**

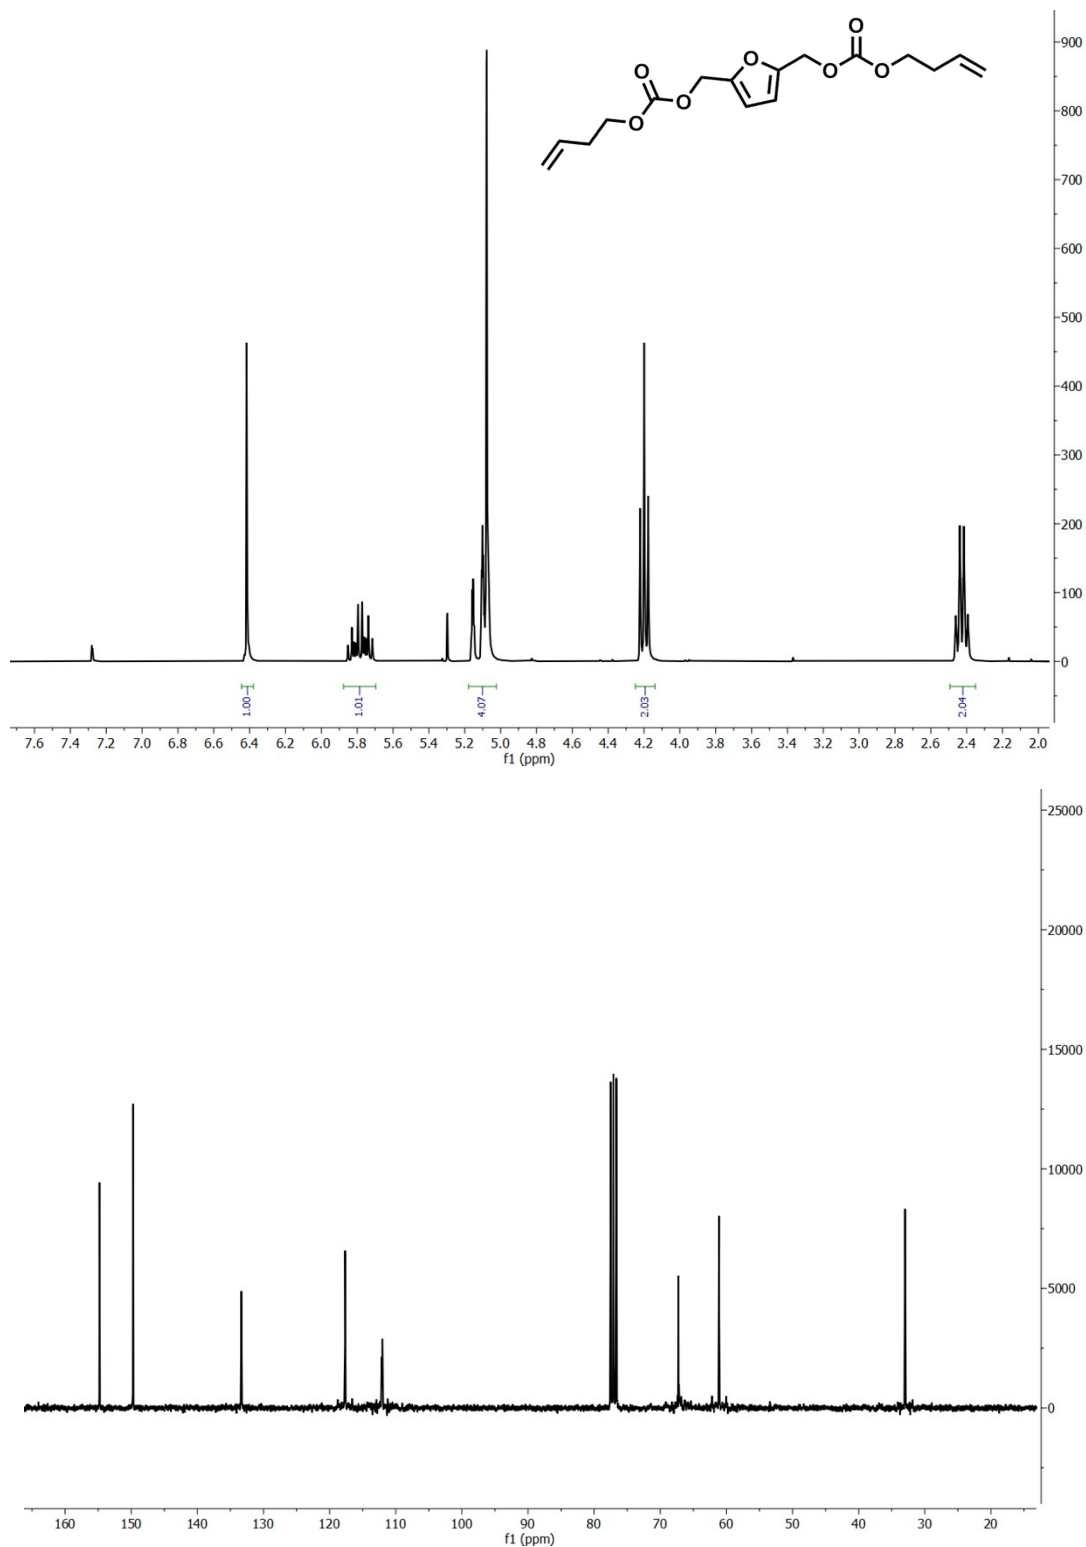

**Figure S6-** (top) <sup>1</sup>H NMR spectra of *But-BACF* in CDCl<sub>3</sub>; (bottom) <sup>13</sup>C NMR spectra of *But-BACF* in CDCl<sub>3</sub>.

Furan-2,5-diylbis(methylene) di(hex-5-en-1-yl) bis(carbonate) (*Hex-BACF*)

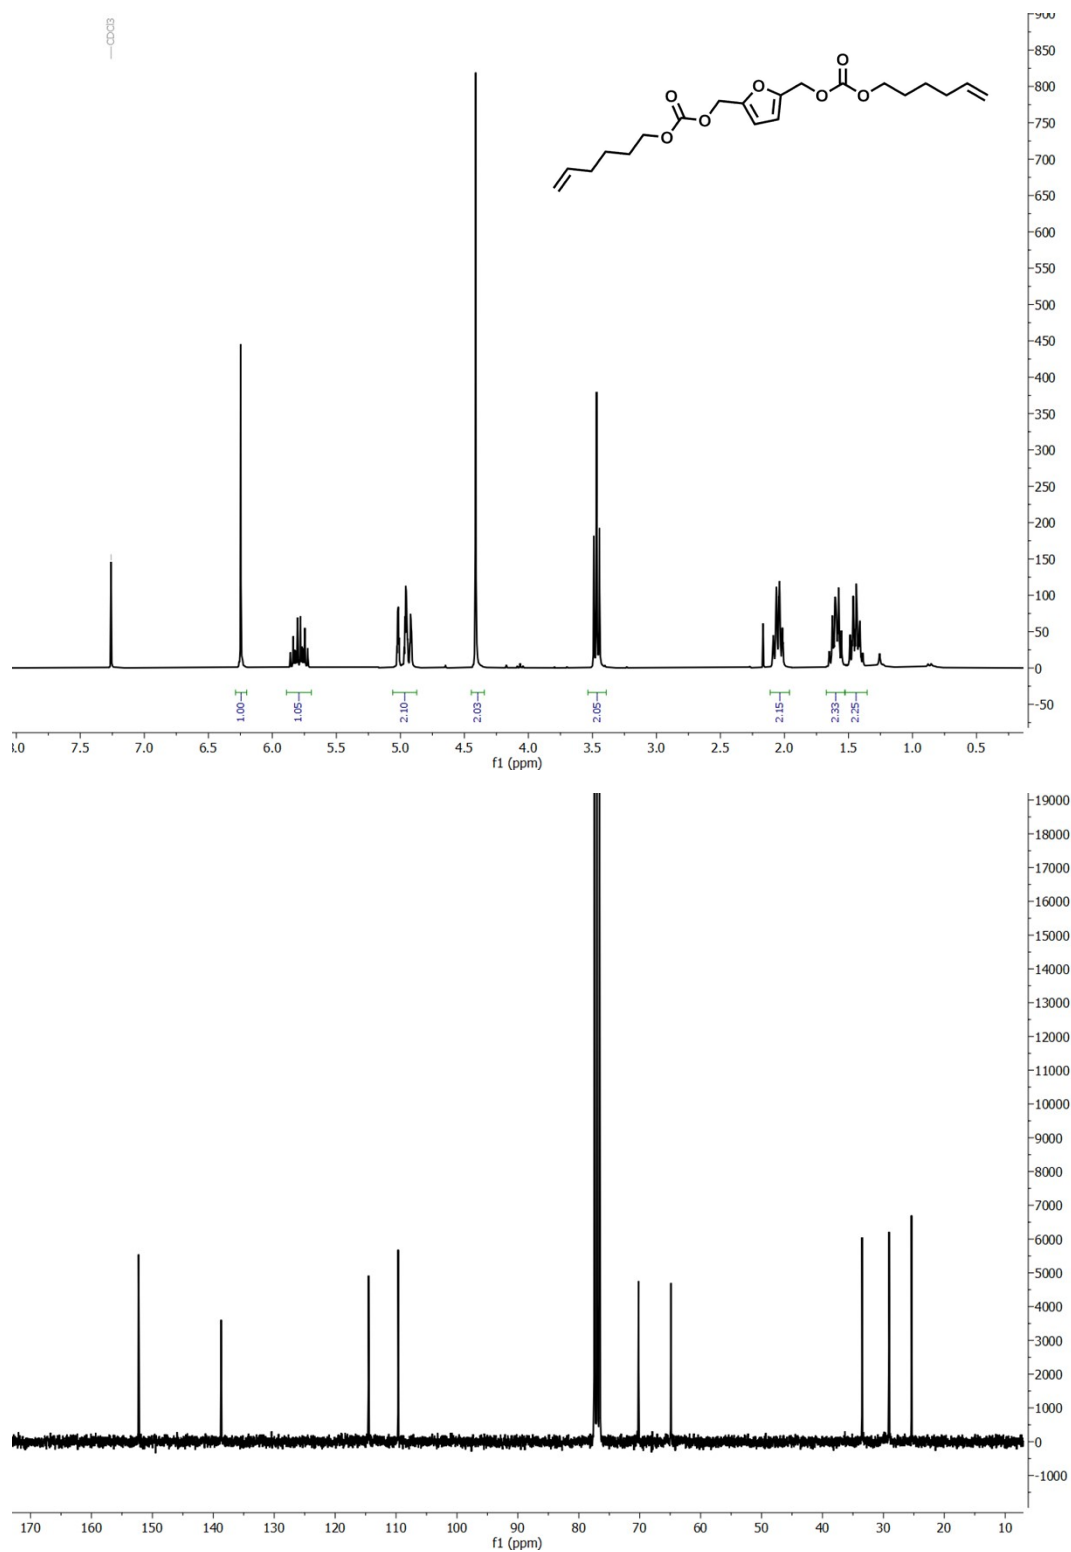

Figure S7- (top) <sup>1</sup>H NMR spectra of *Hex-BACF* in CDCl<sub>3</sub>; (bottom) <sup>13</sup>C NMR spectra of *Hex-BACF* in CDCl<sub>3</sub>.

**Di(dec-9-en-1-yl) (furan-2,5-diylbis(methylene)) bis(carbonate) (*Dec-BACF*)**

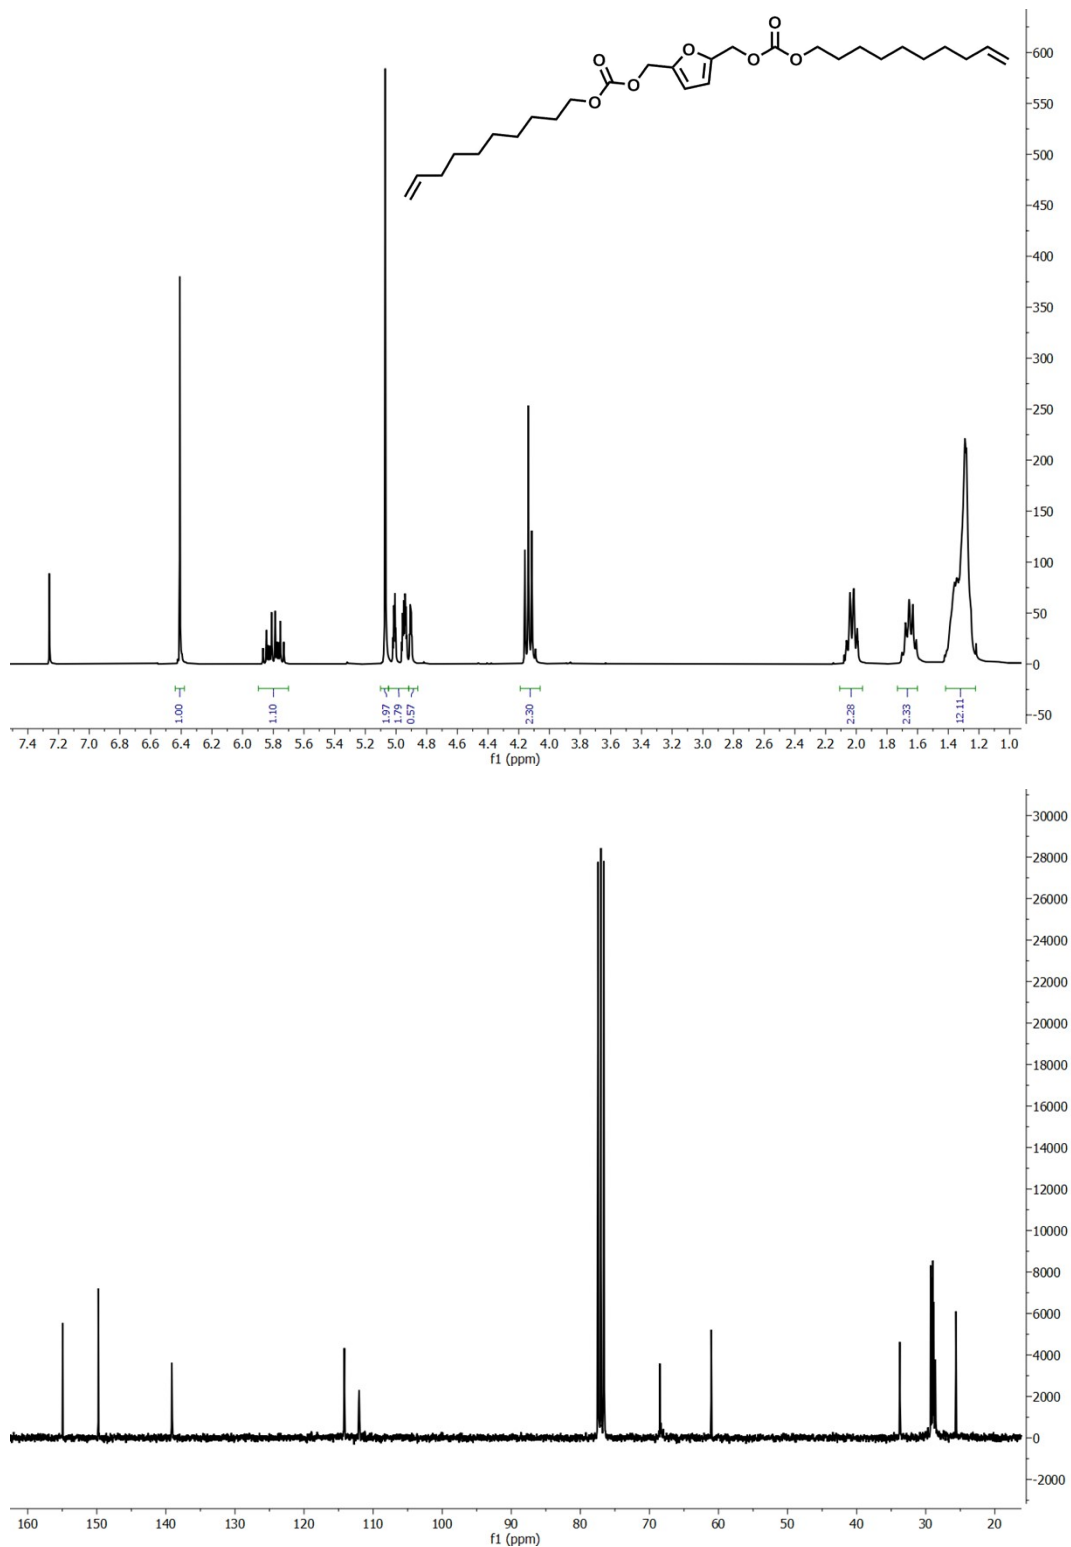

**Figure S8-** (top) <sup>1</sup>H NMR spectra of *Dec-BACF* in CDCl<sub>3</sub>; (bottom) <sup>13</sup>C NMR spectra of *Dec-BACF* in CDCl<sub>3</sub>.

**But-BACF derived homo-polymer (P(But-BACF))**

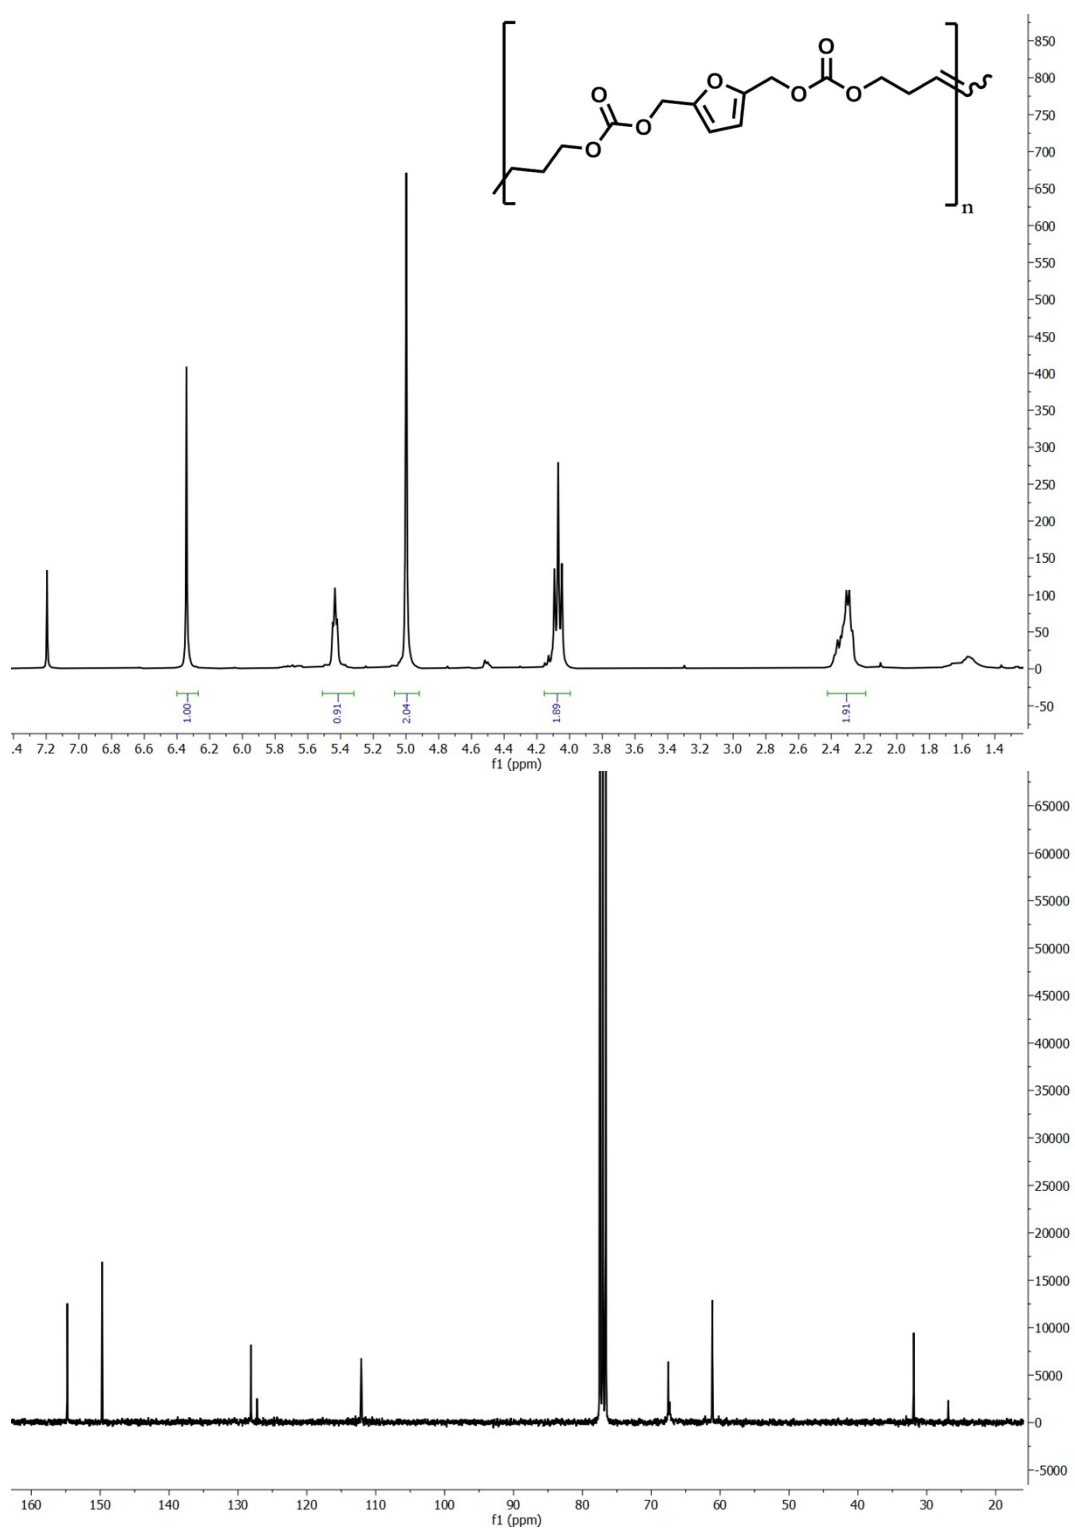

**Figure S9-** (top) <sup>1</sup>H NMR spectra of P(But-BACF) in CDCl<sub>3</sub>; (bottom) <sup>13</sup>C NMR spectra of P(But-BACF) in CDCl<sub>3</sub>.

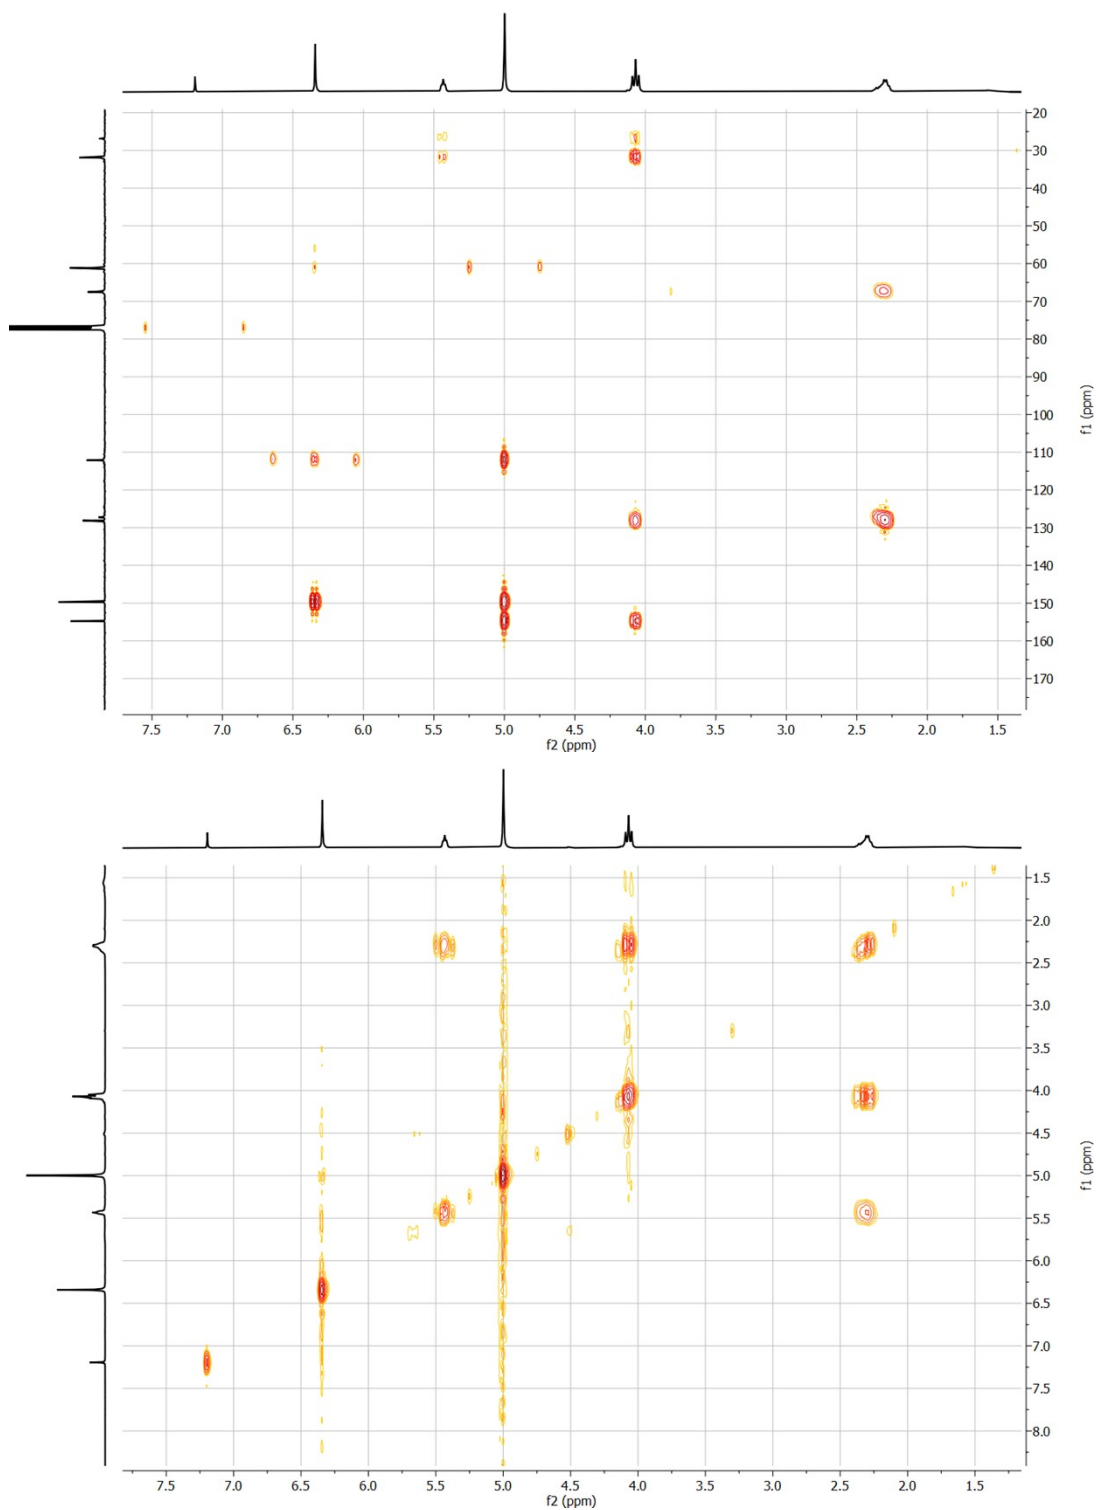

**Figure S10-** (top) 2D <sup>1</sup>H, <sup>13</sup>C-HSQC spectra of P(*But*-BACF) in CDCl<sub>3</sub>; (bottom) 2D <sup>1</sup>H-<sup>1</sup>H COSY spectra of P(*But*-BACF) in CDCl<sub>3</sub>.

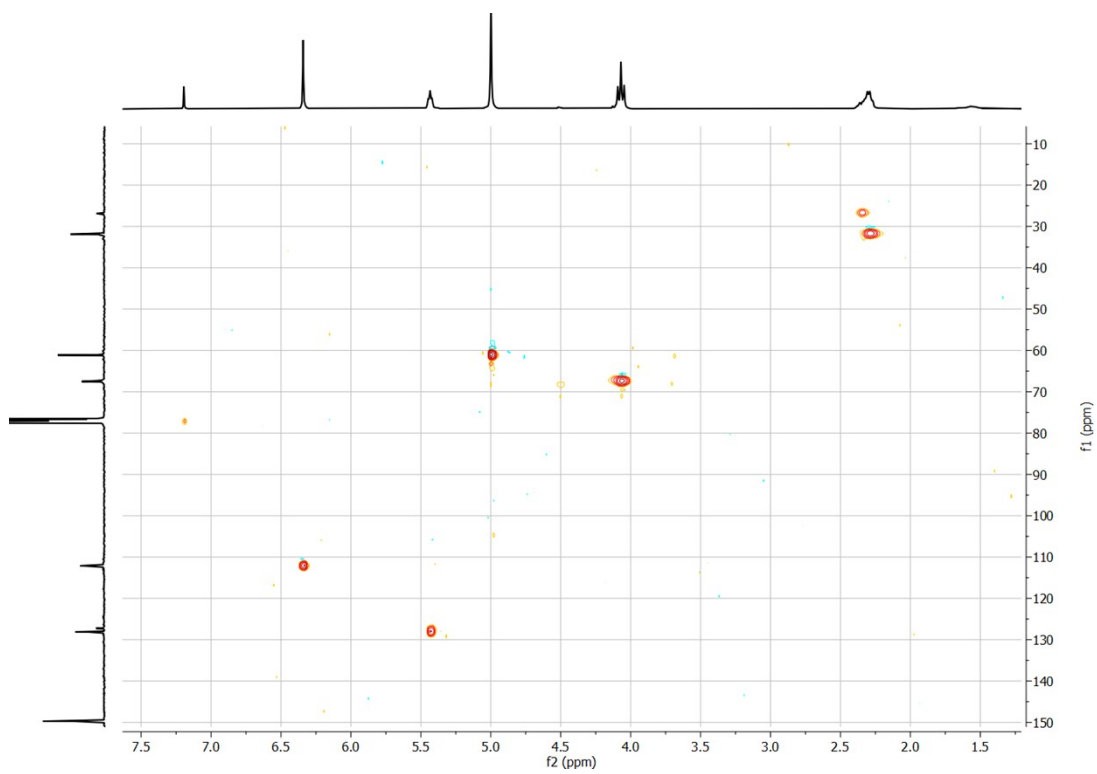

Figure S11- 2D  $^1\text{H}$ ,  $^{13}\text{C}$ -HMQC spectra of P(*But*-BACF) in  $\text{CDCl}_3$ .

**Hex-BACF derived homo-polymer (P(*Hex*-BACF))**



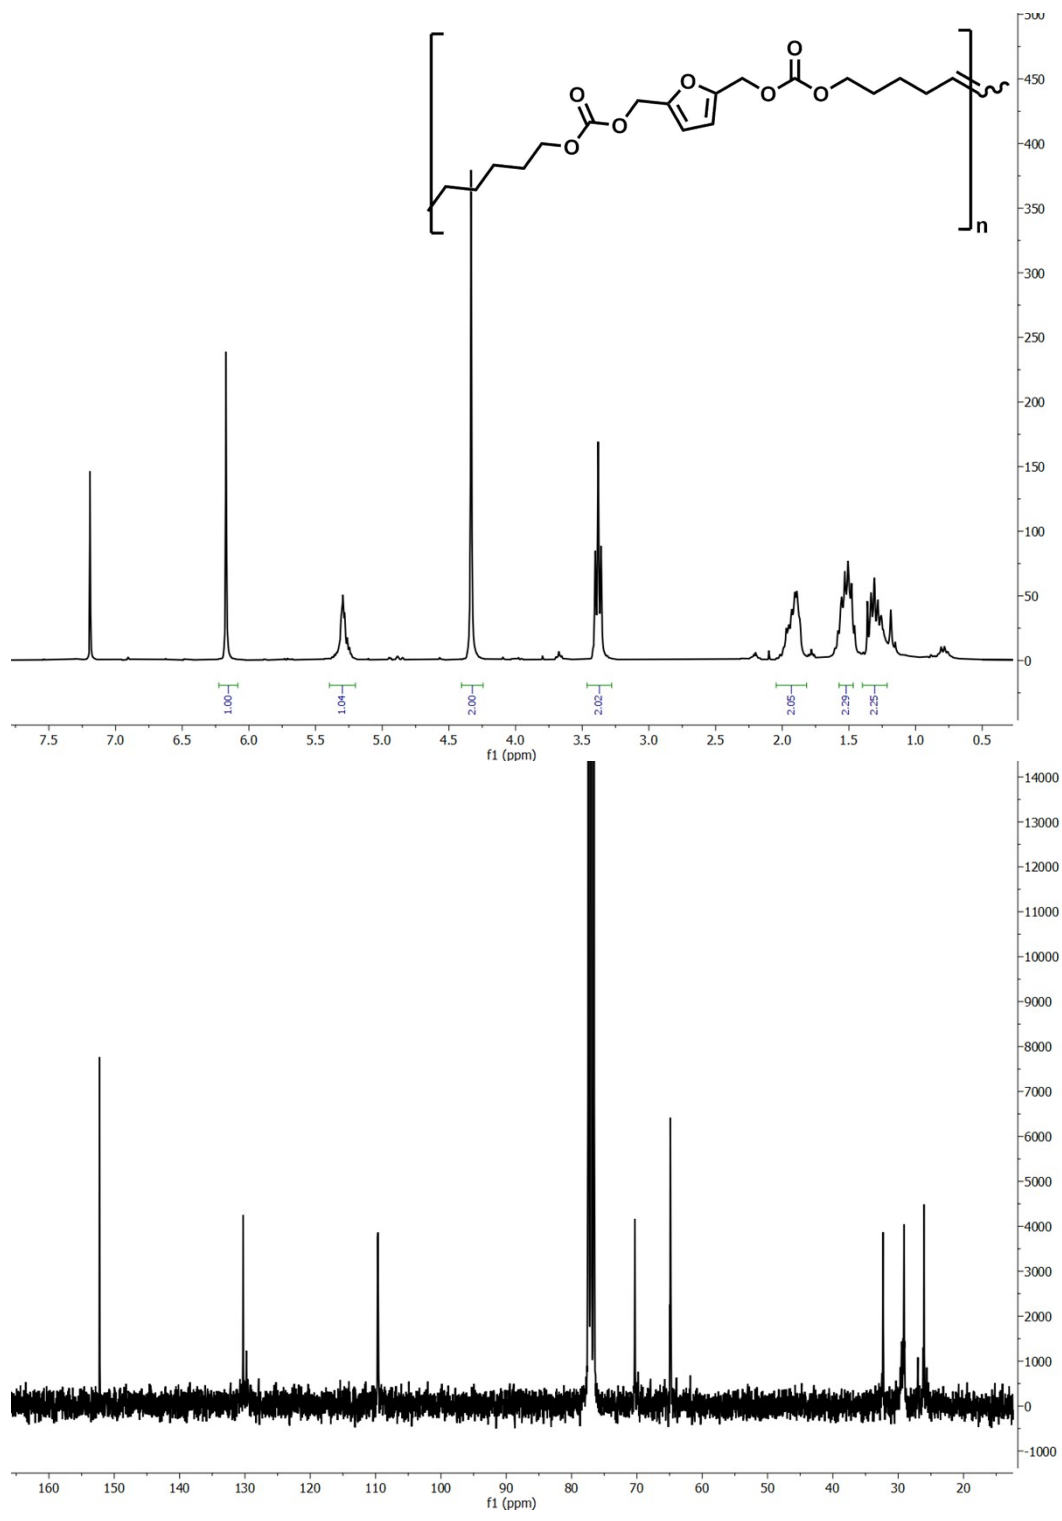

**Figure S12-** (top) <sup>1</sup>H NMR spectra of P(Hex-BACF) in CDCl<sub>3</sub>; (bottom) <sup>13</sup>C NMR spectra of P(Hex-BACF) in CDCl<sub>3</sub>.

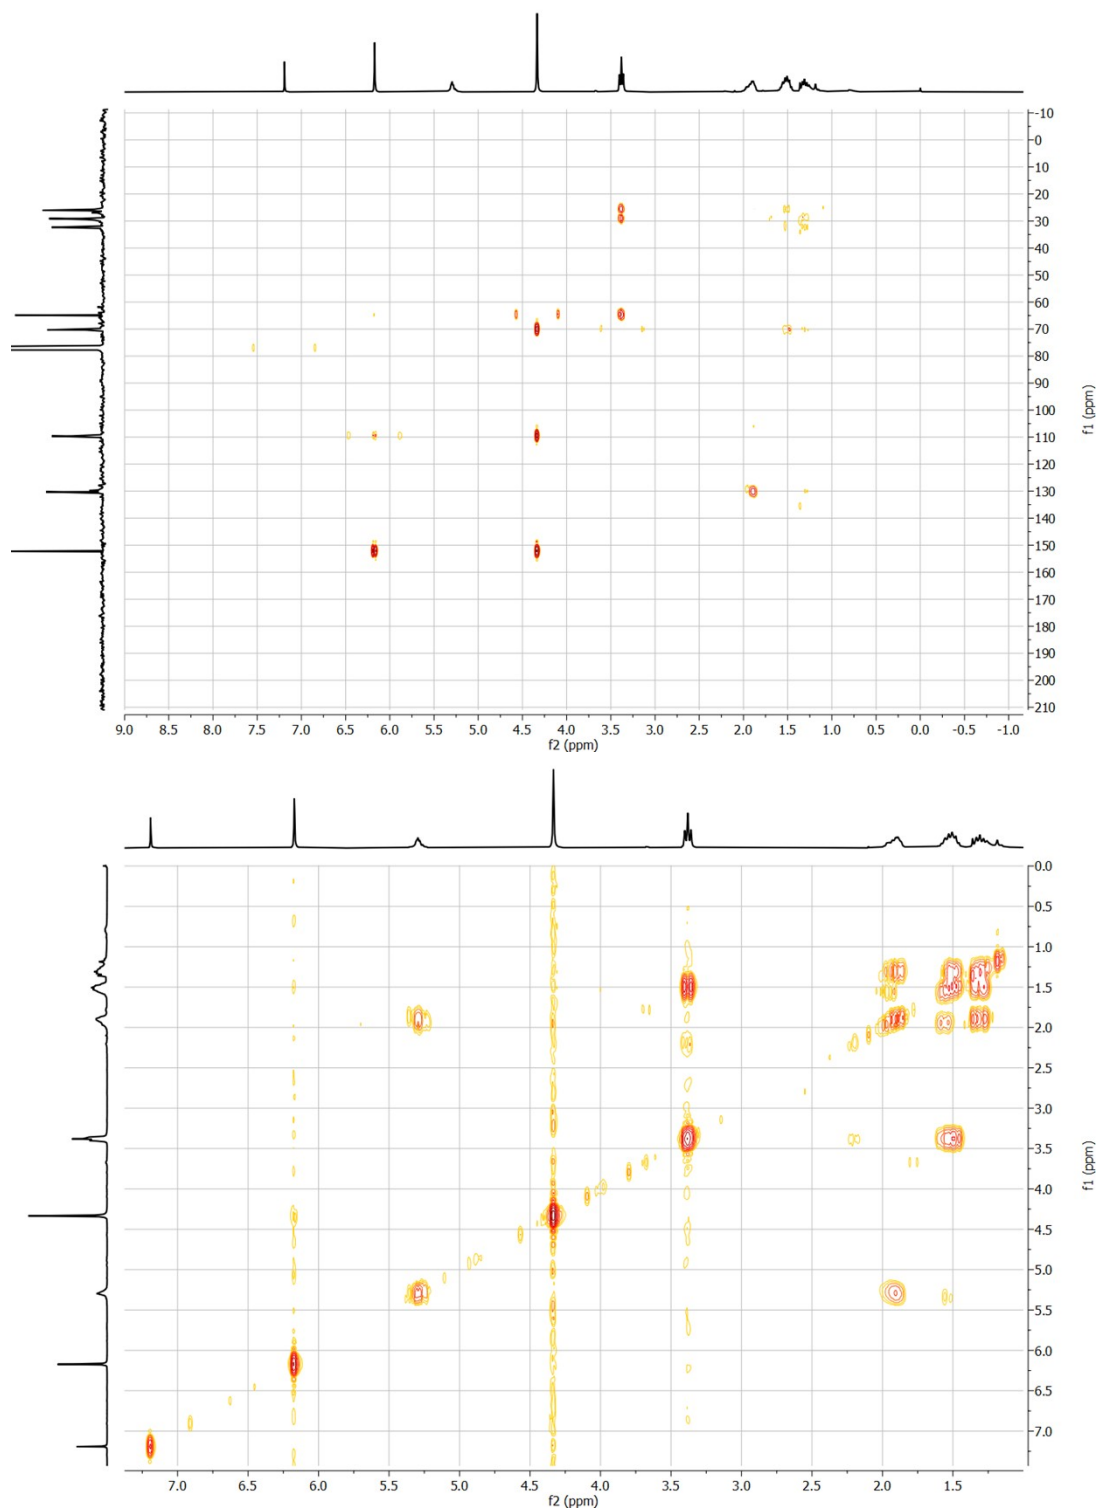

**Figure S13-** (top) 2D <sup>1</sup>H,<sup>13</sup>C-HSQC spectra of P(Hex-BACF) in CDCl<sub>3</sub>; (bottom) 2D <sup>1</sup>H-<sup>1</sup>H COSY spectra of P(Hex-BACF) in CDCl<sub>3</sub>.

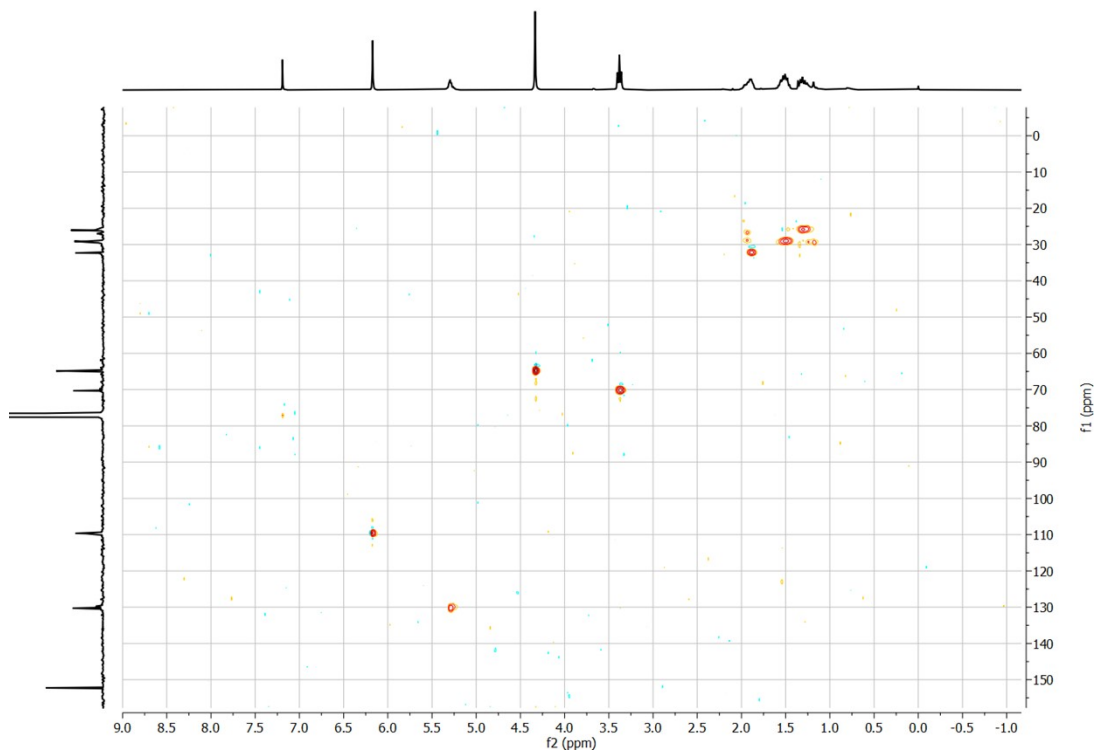

Figure S14- 2D  $^1\text{H}$ ,  $^{13}\text{C}$ -HMQC spectra of P(Hex-BACF) in  $\text{CDCl}_3$ .

### Dec-BACF derived homo-polymer (P(Dec-BACF))

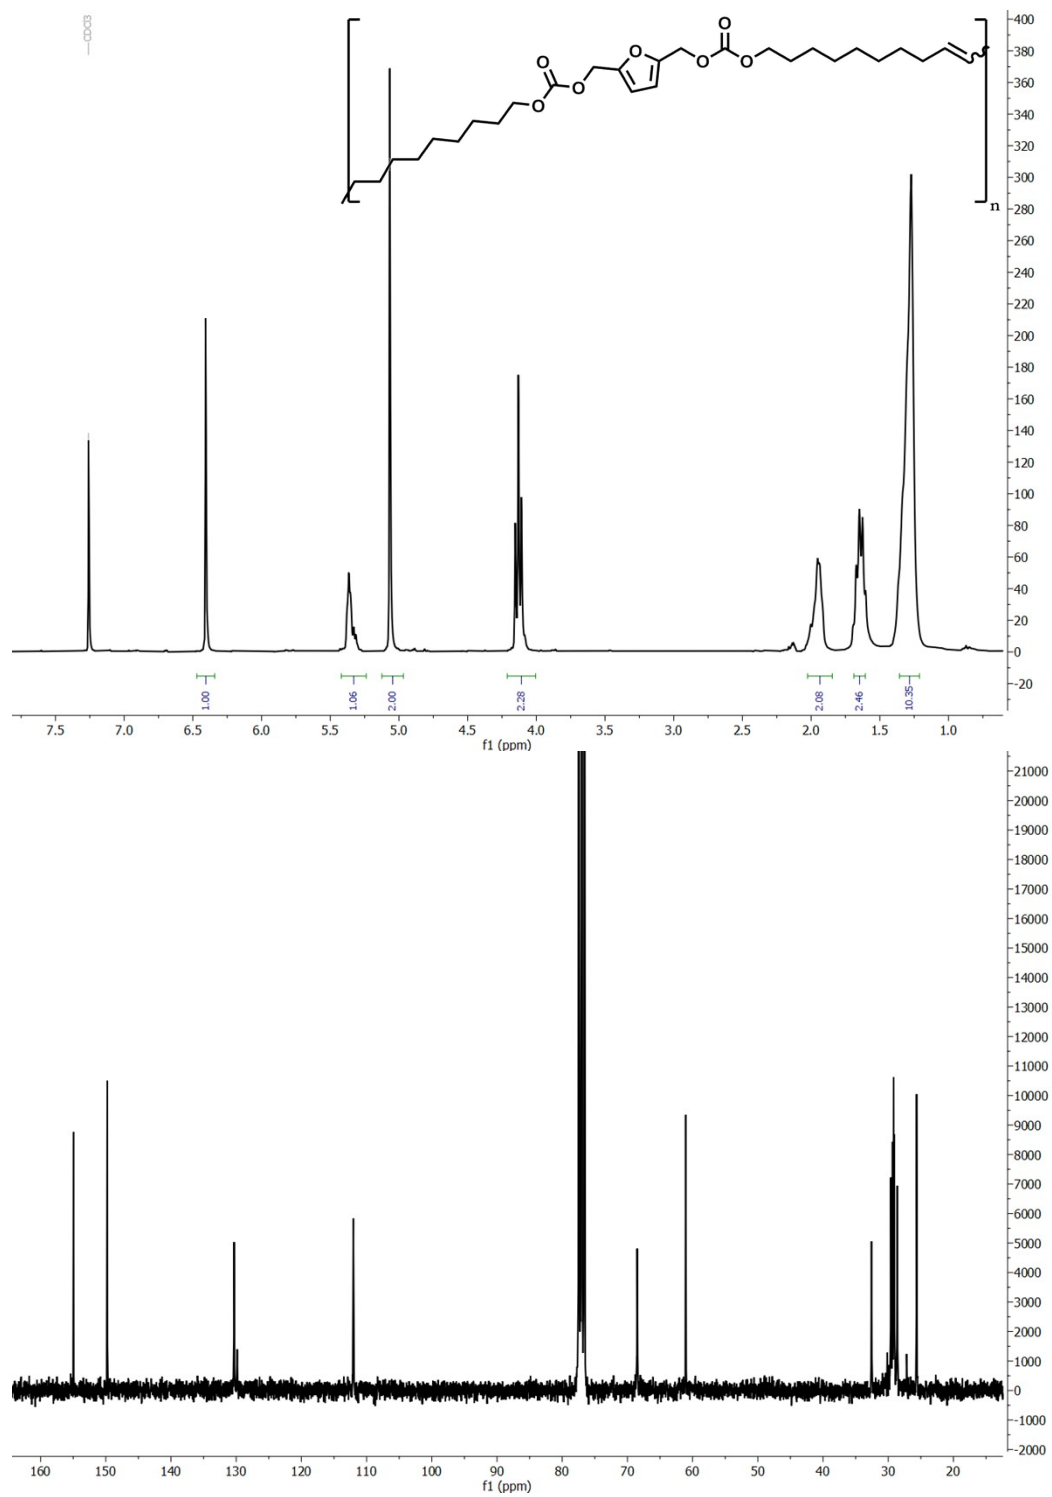

Figure S15- (top)  $^1\text{H}$  NMR spectra of P(Dec-BACF) in  $\text{CDCl}_3$ ; (bottom)  $^{13}\text{C}$  NMR spectra of P(Dec-BACF) in  $\text{CDCl}_3$ .

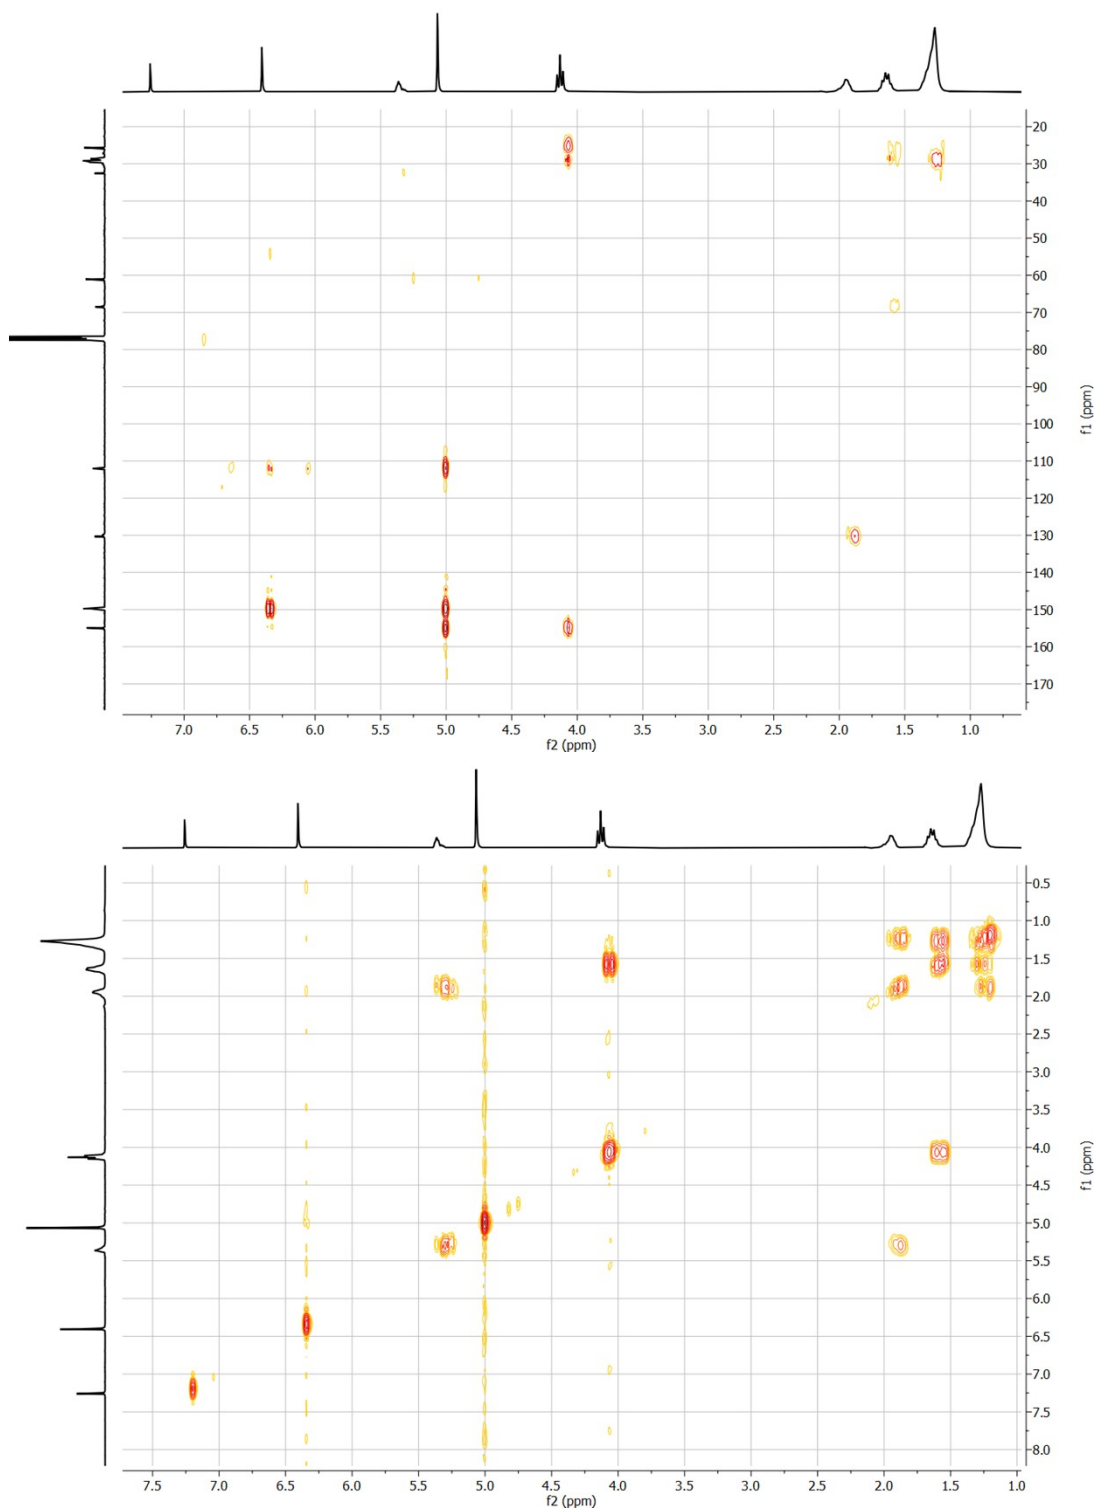

**Figure S16-** (top) 2D <sup>1</sup>H, <sup>13</sup>C-HSQC spectra of P(Dec-BACF) in CDCl<sub>3</sub>; (bottom) 2D <sup>1</sup>H-<sup>1</sup>H COSY spectra of P(Dec-BACF) in CDCl<sub>3</sub>.

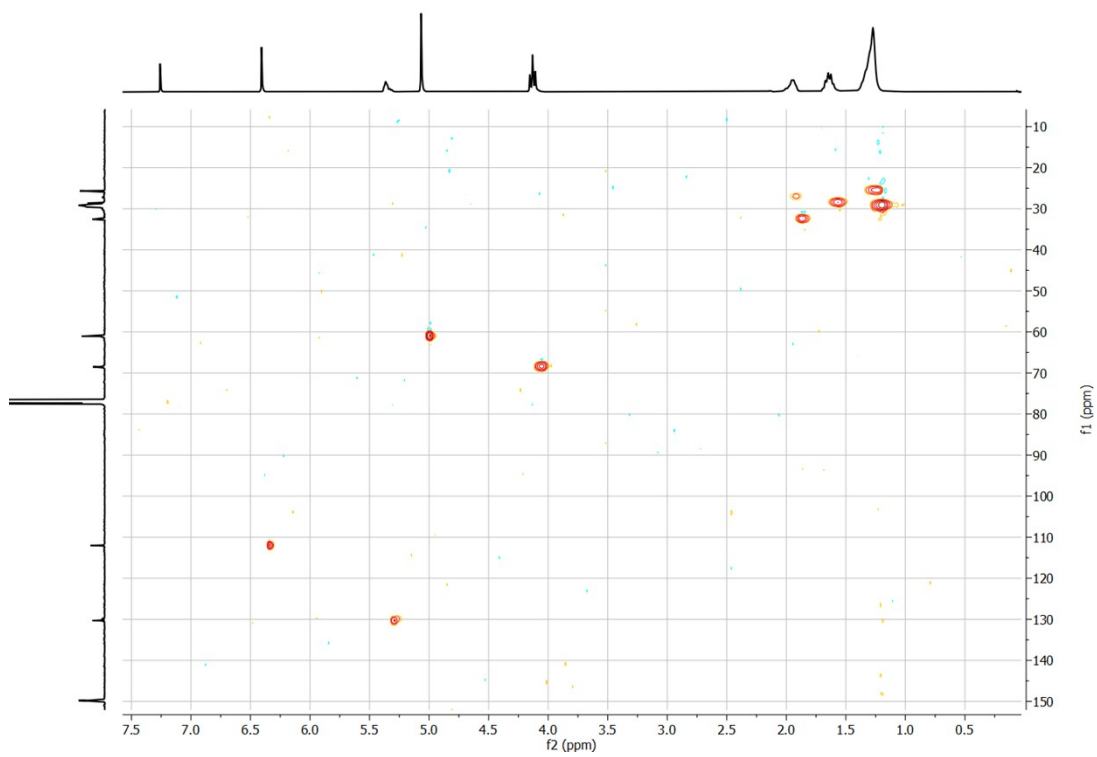

**Figure S17-** 2D  $^1\text{H}$ ,  $^{13}\text{C}$ -HMQC spectra of P(Dec-BACF) in  $\text{CDCl}_3$ .

### Synthesis of P(Dec-BACF: Dec-FDE) (1:1) co-polymer

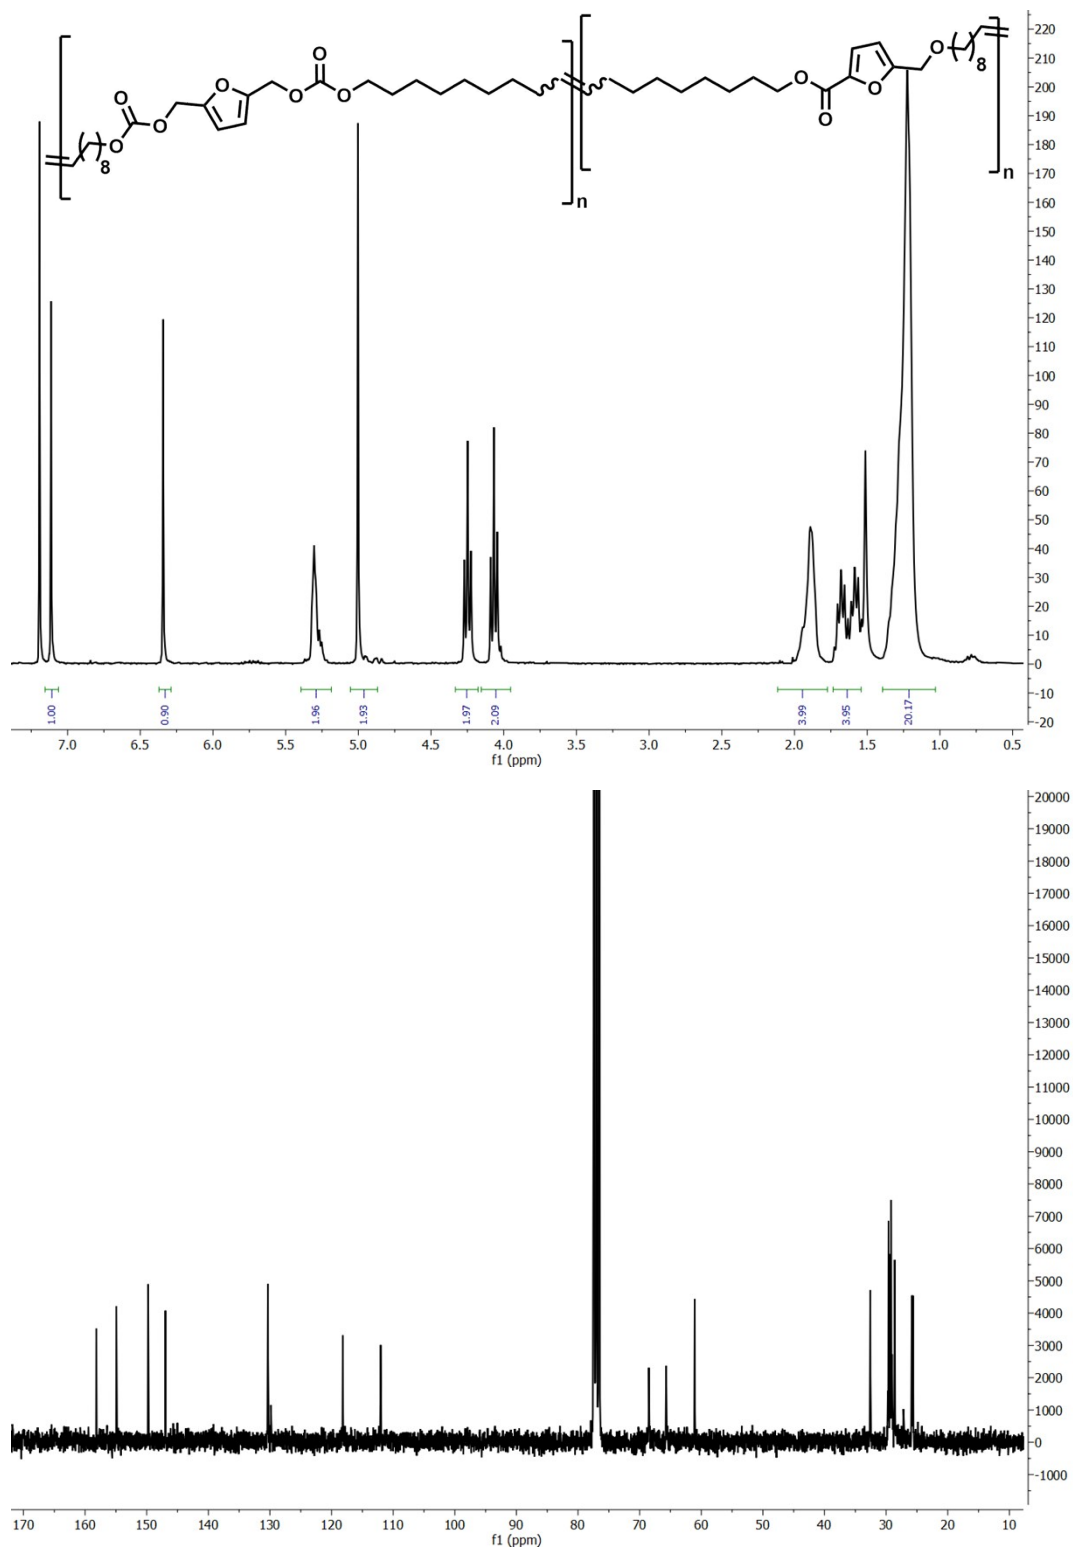

**Figure S18-** (top)  $^1\text{H}$  NMR spectra of P(Dec-BACF: Dec-FDE) in  $\text{CDCl}_3$ ; (bottom)  $^{13}\text{C}$  NMR spectra of P(Dec-BACF: Dec-FDE) in  $\text{CDCl}_3$ .

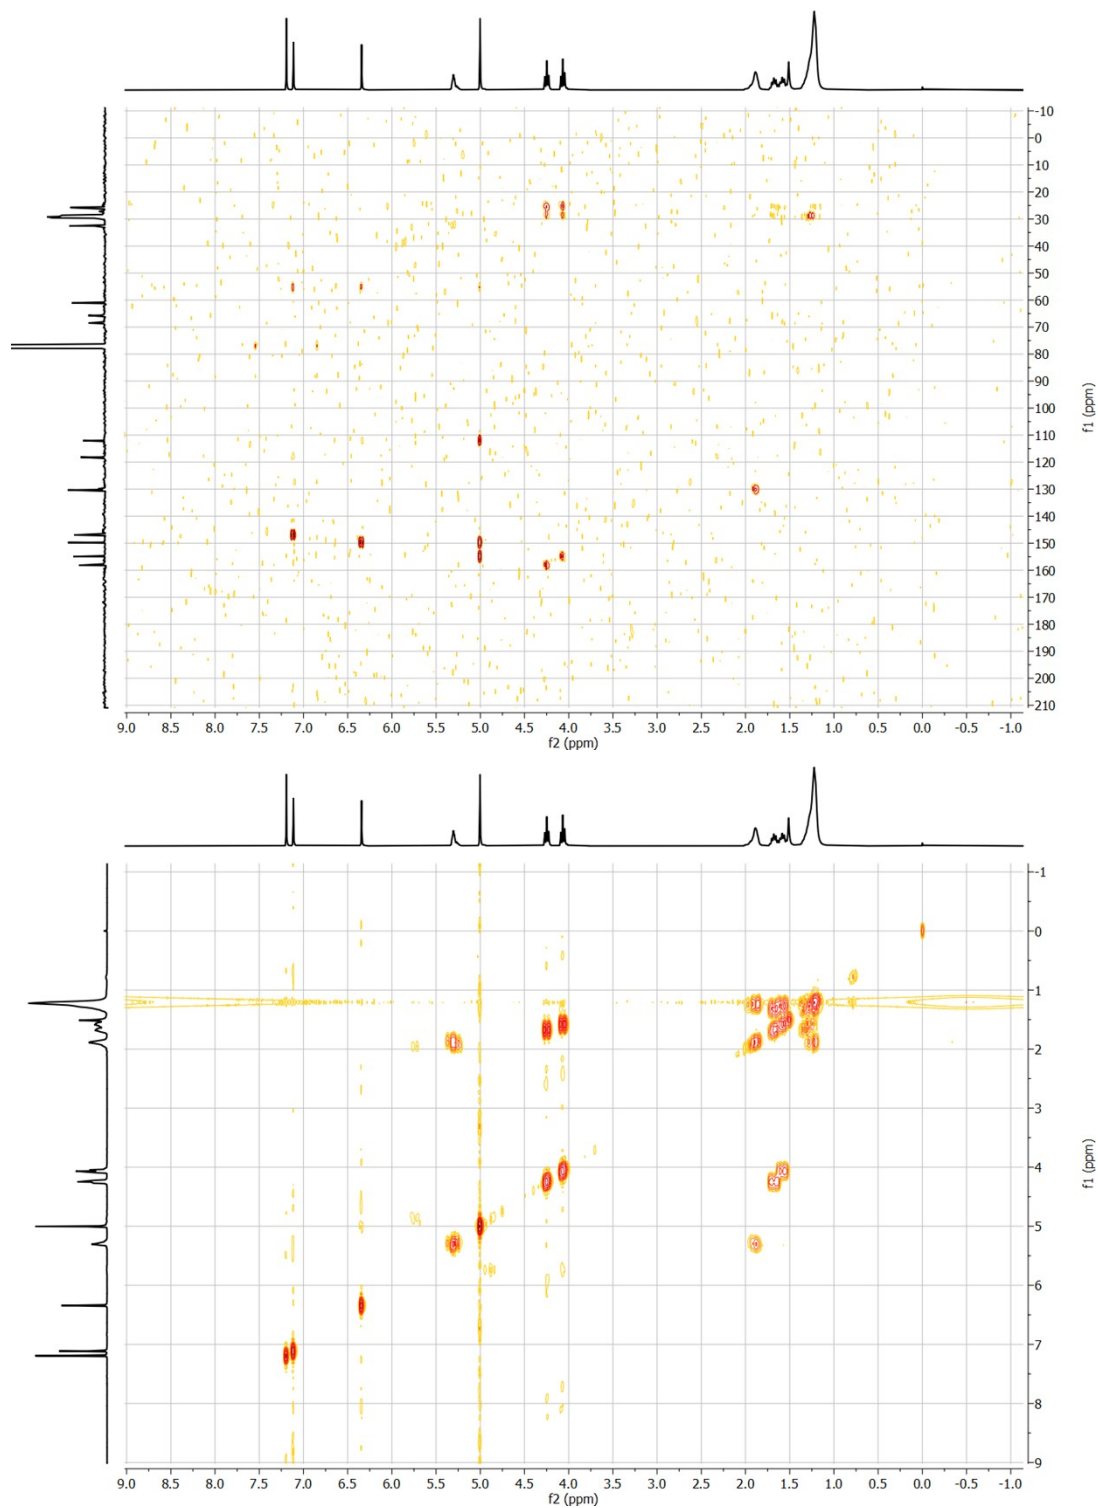

**Figure S19-** (top) 2D <sup>1</sup>H, <sup>13</sup>C-HSQC spectra of P(Dec-BACF: Dec-FDE) in CDCl<sub>3</sub>; (bottom) 2D <sup>1</sup>H-<sup>1</sup>H COSY spectra of P(Dec-BACF: Dec-FDE) in CDCl<sub>3</sub>.



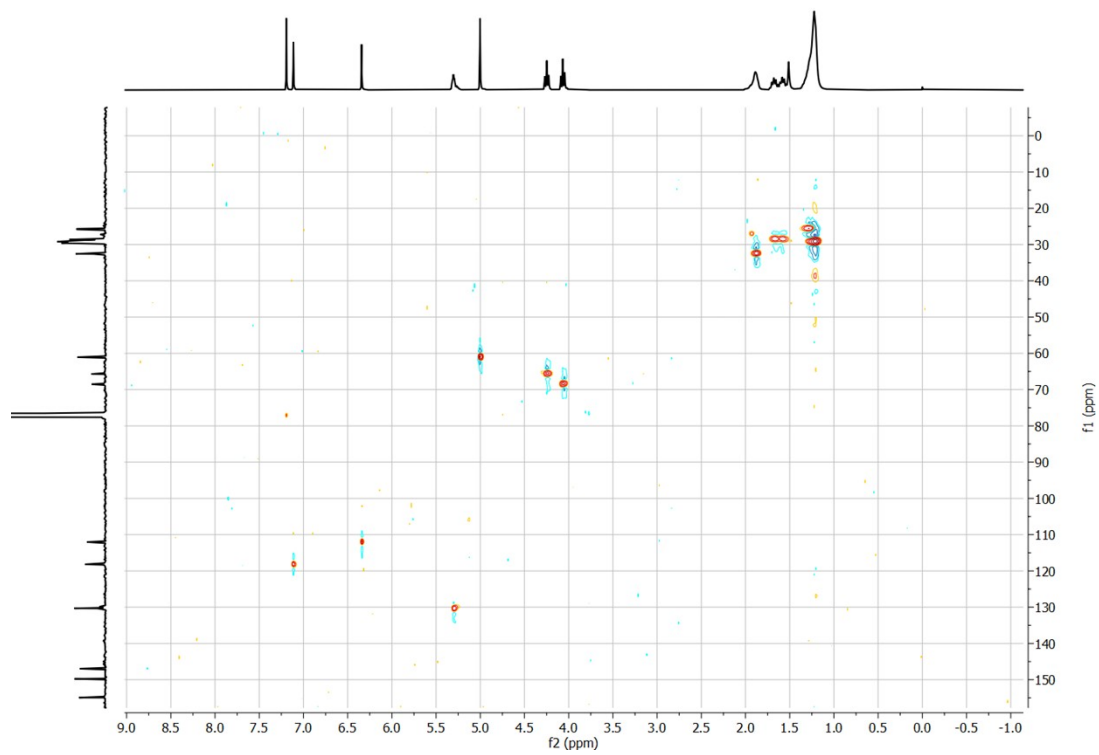

Figure S20- 2D  $^1\text{H}$ ,  $^{13}\text{C}$ -HMQC spectra of P(Dec-BACF: Dec-FDE) in  $\text{CDCl}_3$ .

### Synthesis of P(Dec-BDMF: Dec-BACF) (1:1) co-polymer

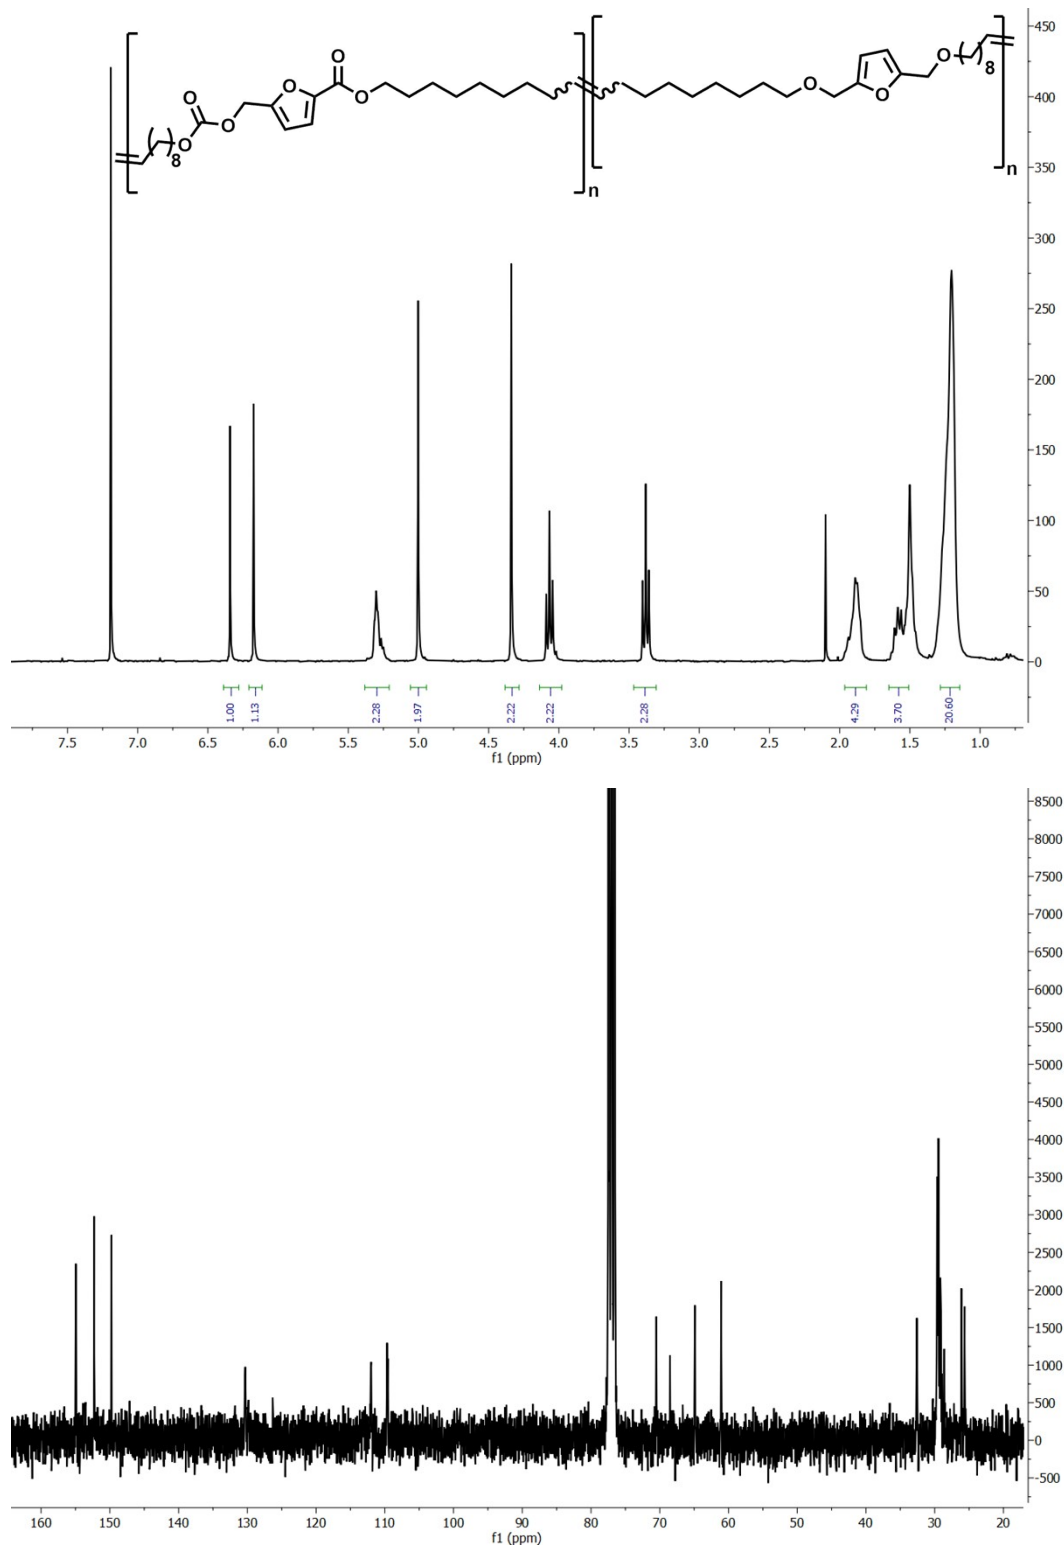

**Figure S21-** (top)  $^1\text{H}$  NMR spectra of P(Dec-BDMF: Dec-BACF) in  $\text{CDCl}_3$ ; (bottom)  $^{13}\text{C}$  NMR spectra of P(Dec-BDMF: Dec-BACF) in  $\text{CDCl}_3$ .

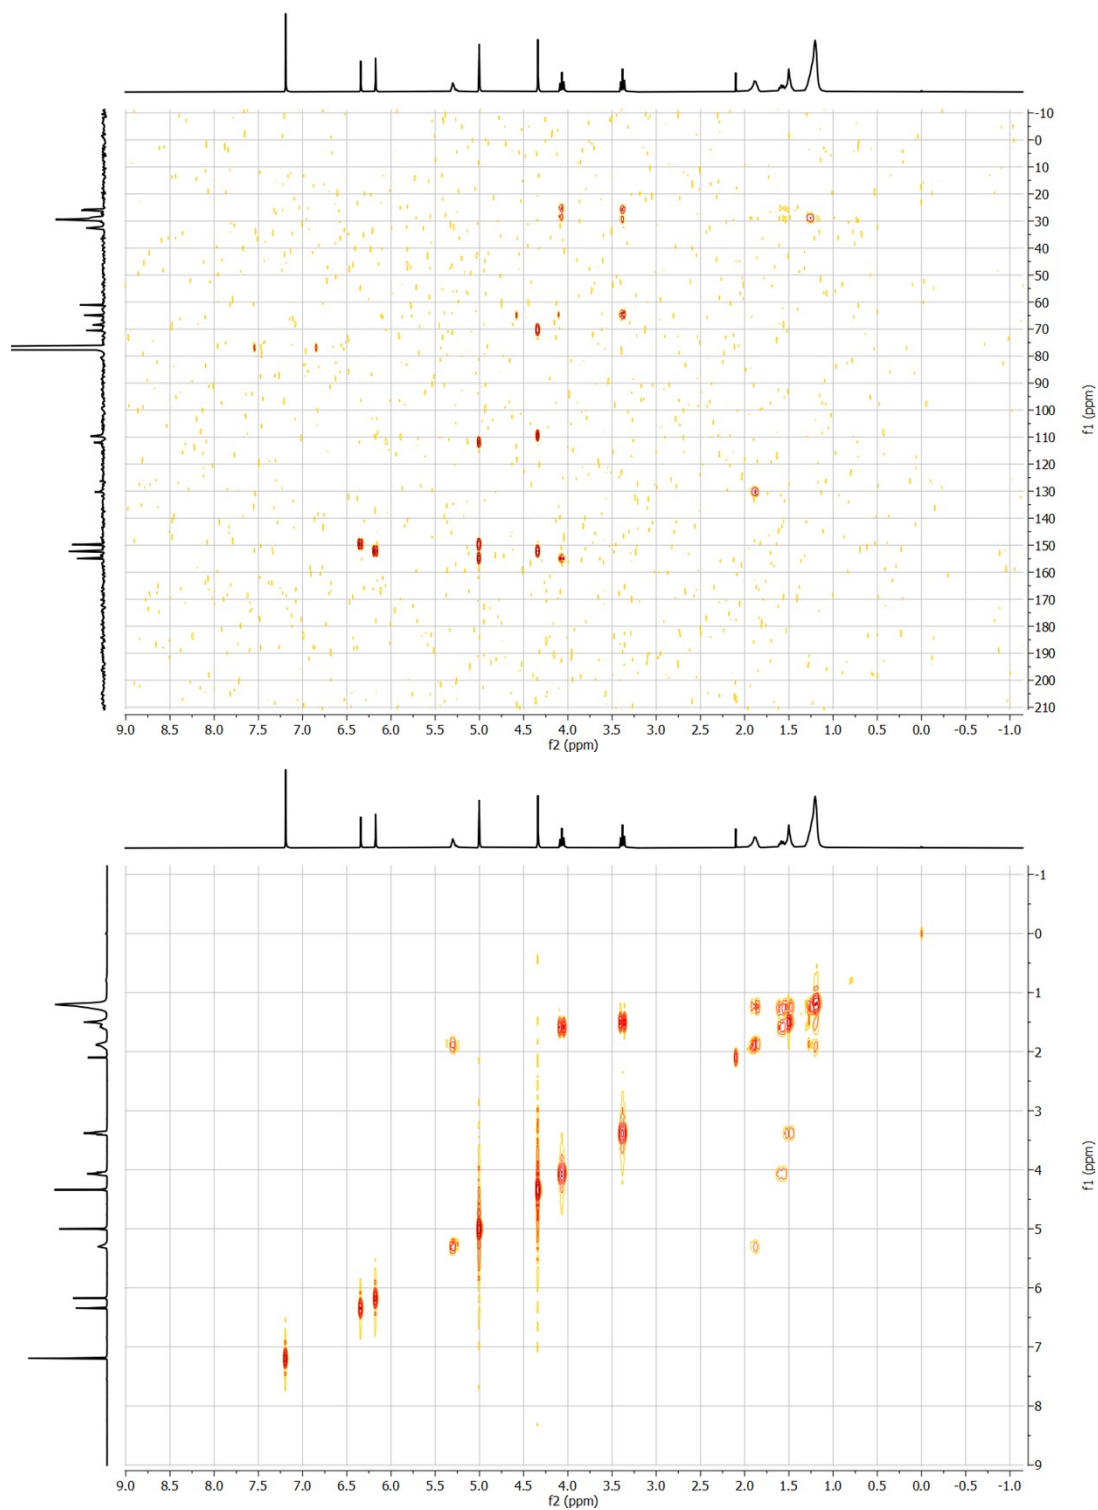

**Figure S22-** (top) 2D  $^1\text{H}$ ,  $^{13}\text{C}$ -HSQC spectra of P(*Dec*-BDMF: *Dec*-BACF) in  $\text{CDCl}_3$ ; (bottom) 2D  $^1\text{H}$ - $^1\text{H}$  COSY spectra of P(*Dec*-BDMF: *Dec*-BACF) in  $\text{CDCl}_3$ .

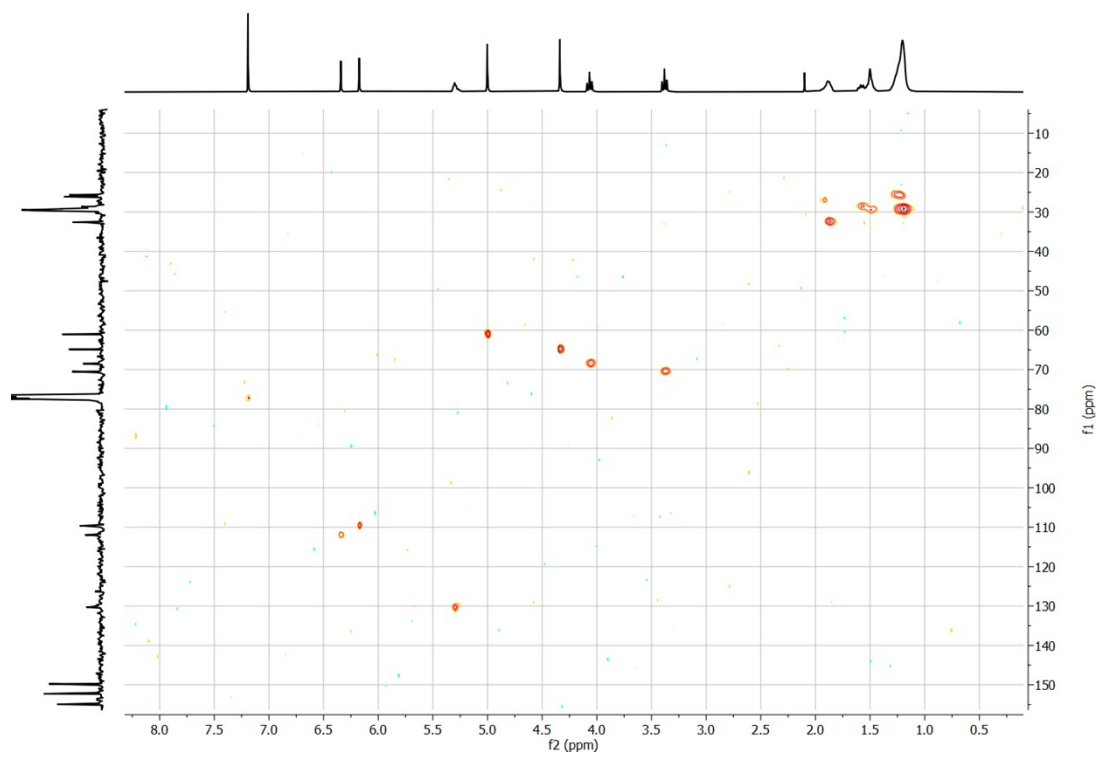

Figure S23- 2D  $^1\text{H}$ ,  $^{13}\text{C}$ -HMQC spectra of P(*Dec*-BDMF: *Dec*-BACF) in  $\text{CDCl}_3$ .

### Synthesis of P(Dec-BDMF: Dec-FDE) (1:1) co-polymer

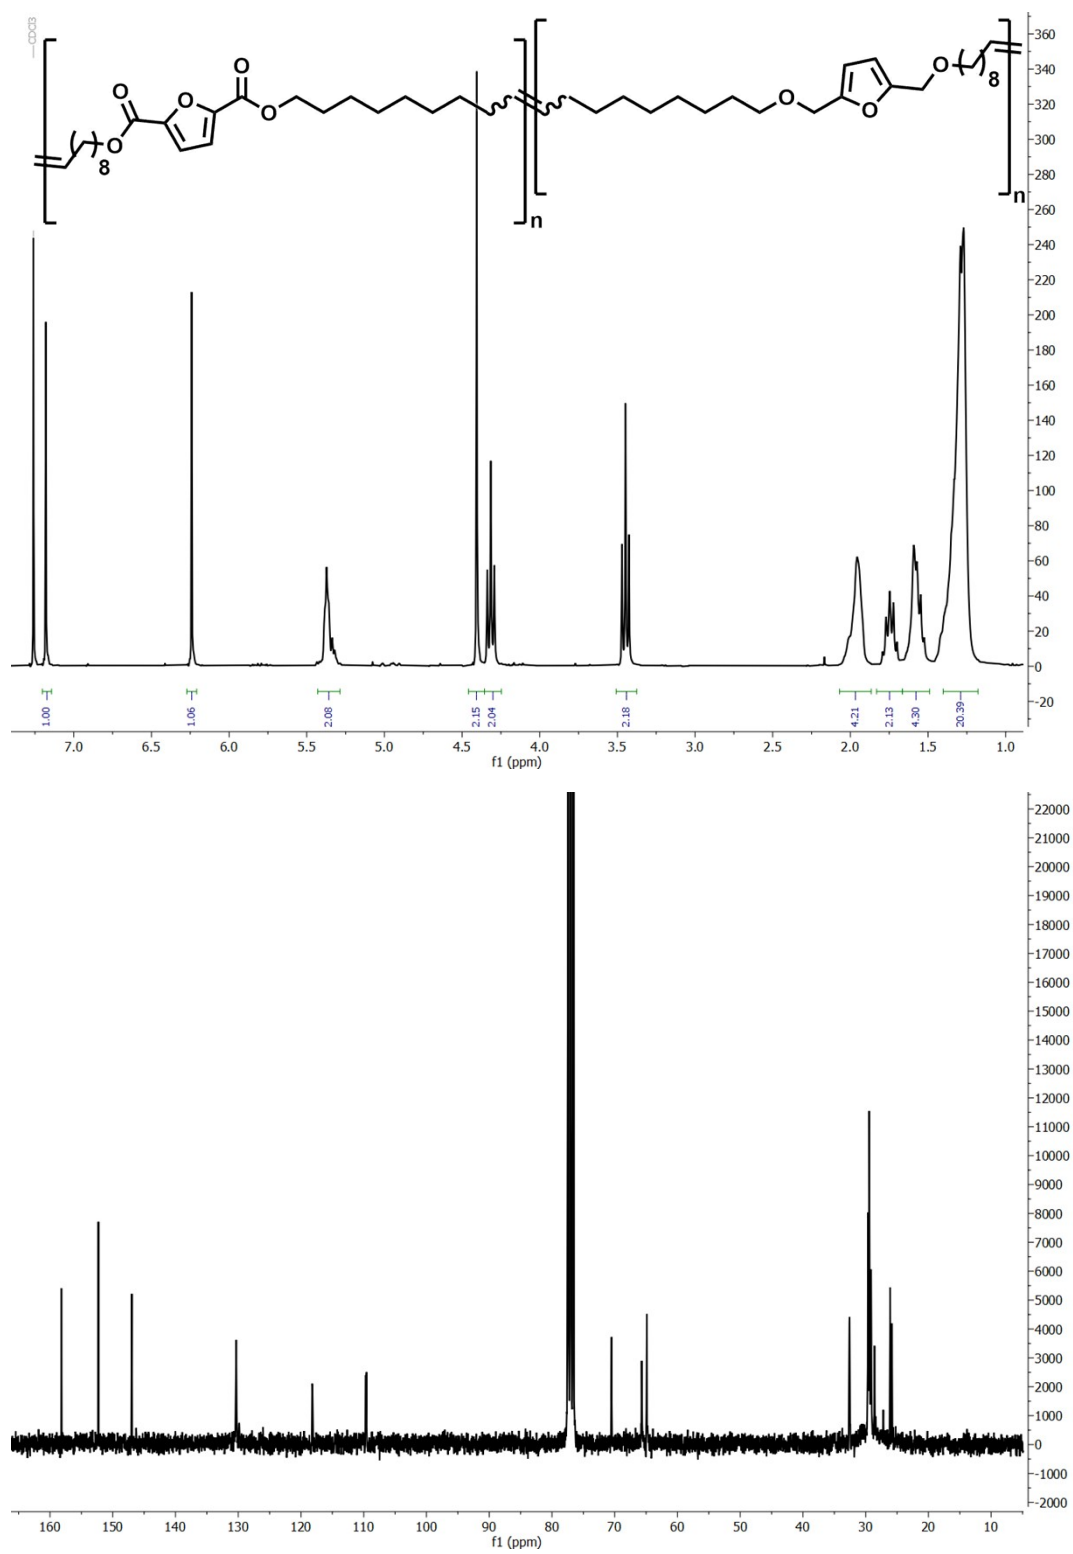

Figure S24- (top)  $^1\text{H}$  NMR spectra of P(Dec-BDMF: Dec-FDE) in  $\text{CDCl}_3$ ; (bottom)  $^{13}\text{C}$  NMR spectra of P(Dec-BDMF: Dec-FDE) in  $\text{CDCl}_3$ .

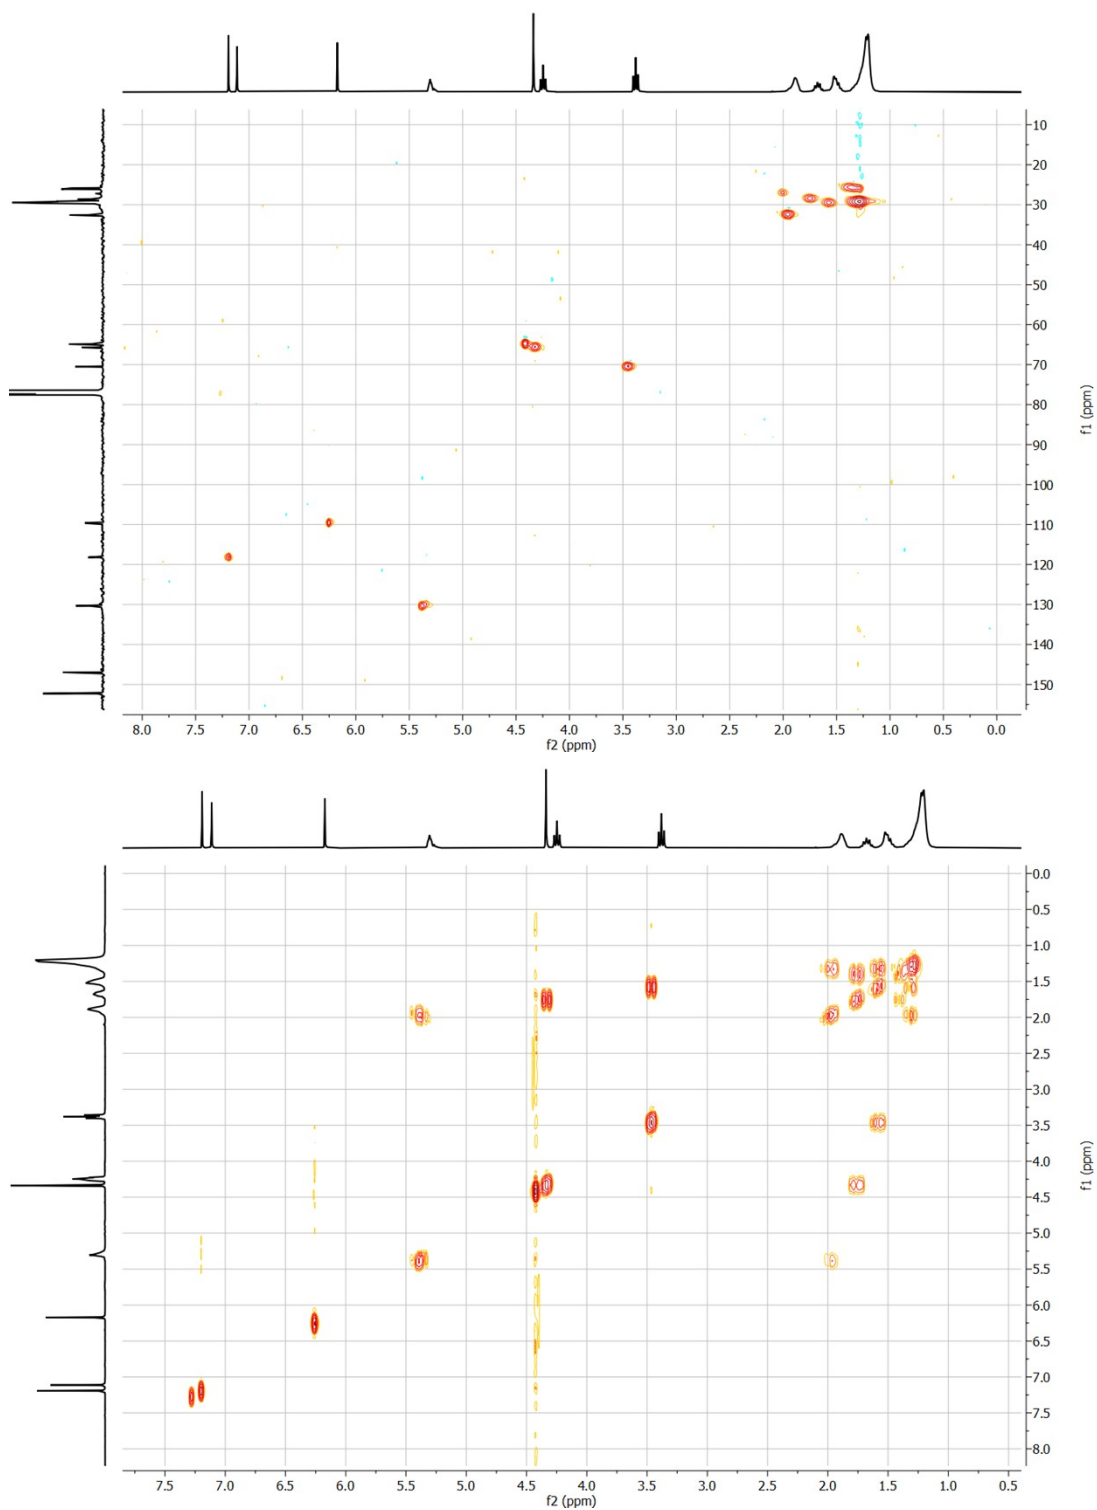

**Figure S25-** (top) 2D <sup>1</sup>H,<sup>13</sup>C-HSQC spectra of P(Dec-BDMF: Dec-FDE) in CDCl<sub>3</sub>; (bottom) 2D <sup>1</sup>H-<sup>1</sup>H COSY spectra of P(Dec-BDMF: Dec-FDE) in CDCl<sub>3</sub>.

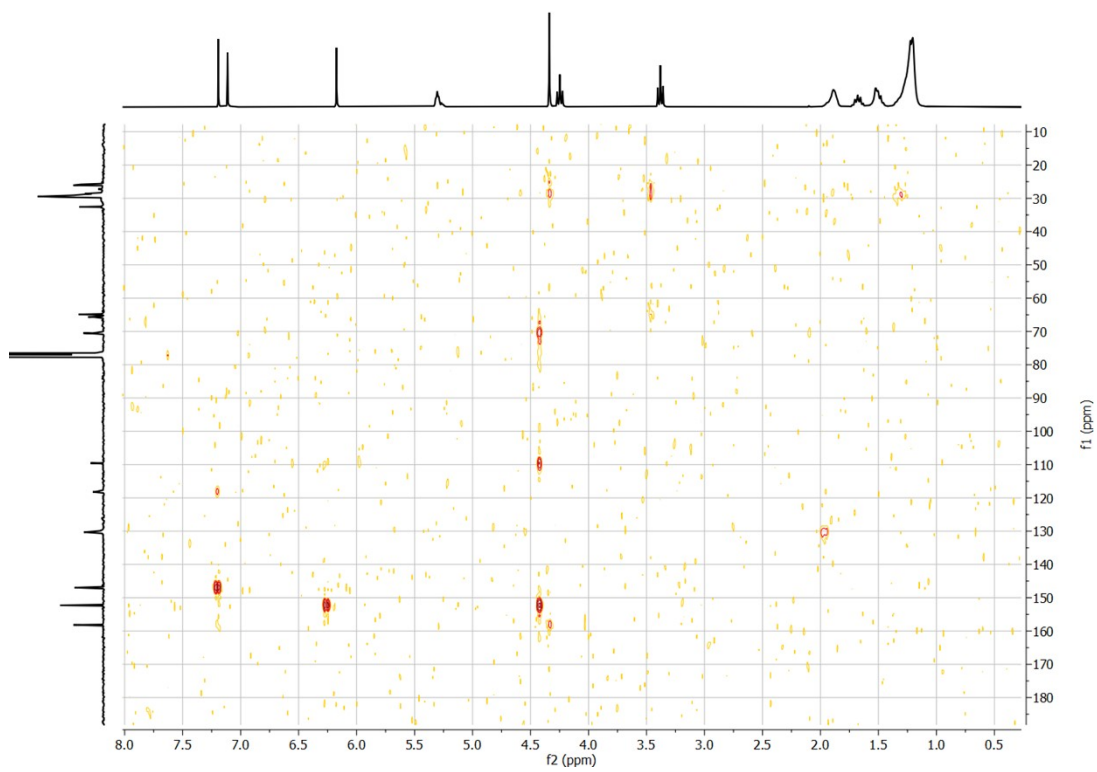

Figure S26- 2D  $^1\text{H}$ ,  $^{13}\text{C}$ -HMQC spectra of P(*Dec*-BDMF: *Dec*-FDE) in  $\text{CDCl}_3$ .

### Synthesis of P(*Dec*-FDE: *But*-BACF) (1:1) co-polymer

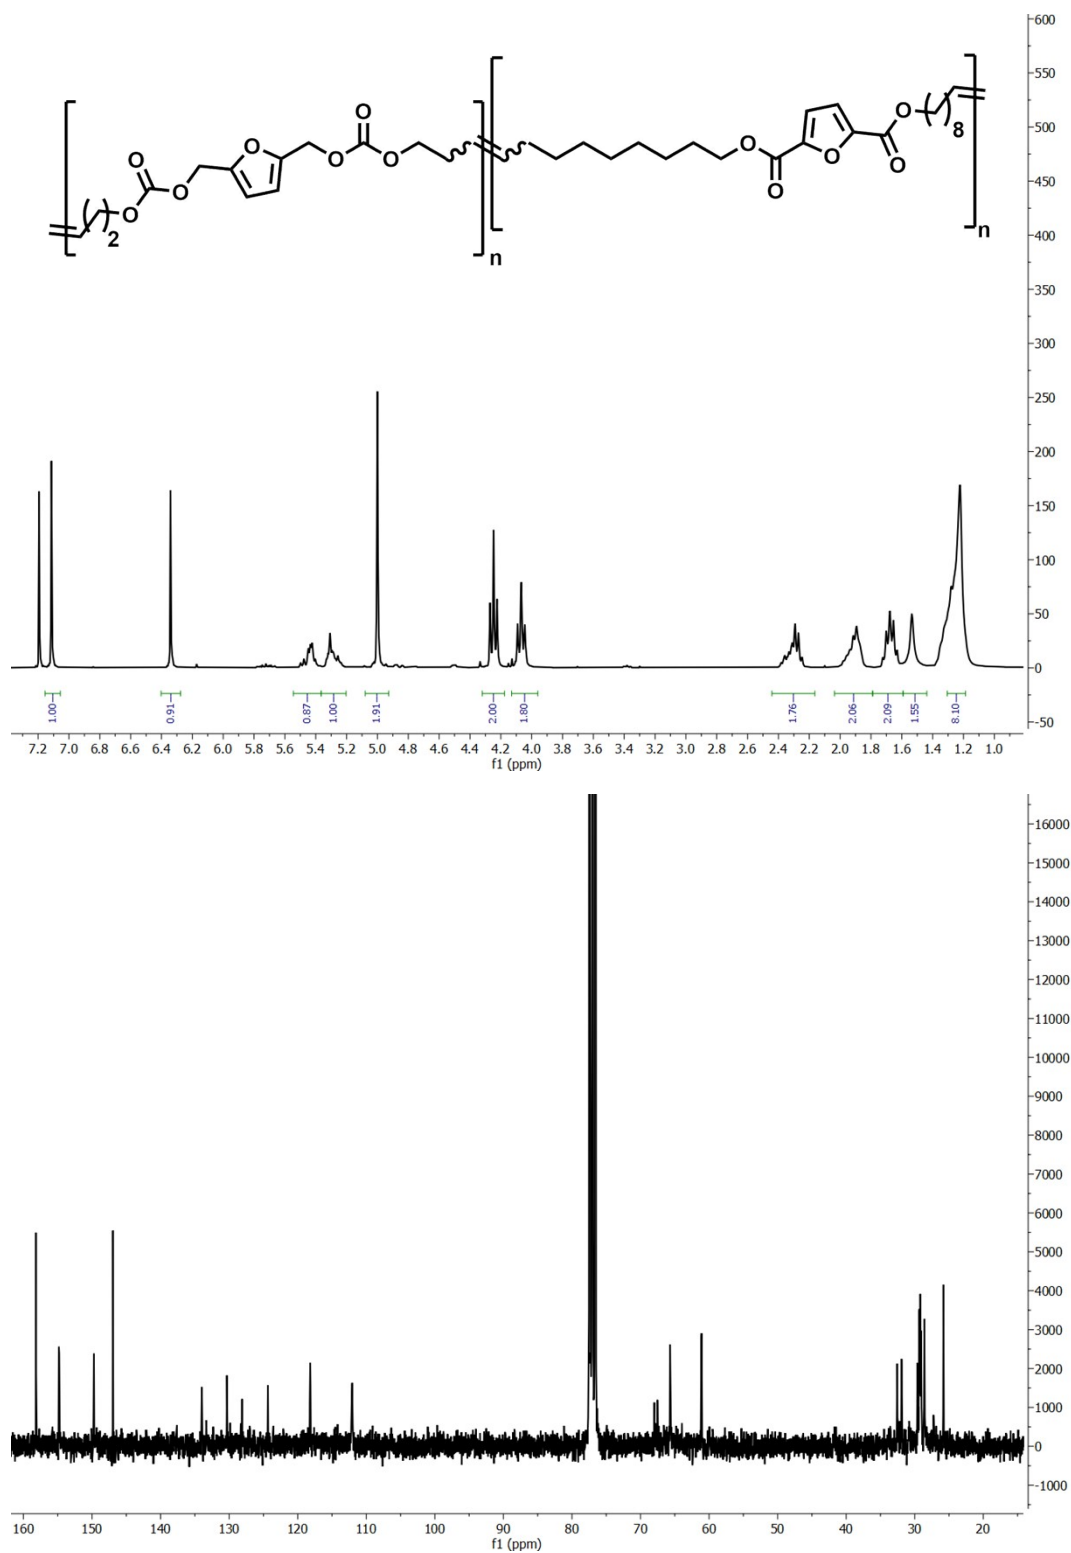

Figure S27- (top)  $^1\text{H}$  NMR spectra of P(*Dec*-FDE: *But*-BACF) in  $\text{CDCl}_3$ ; (bottom)  $^{13}\text{C}$  NMR spectra of P(*Dec*-FDE: *But*-BACF) in  $\text{CDCl}_3$ .



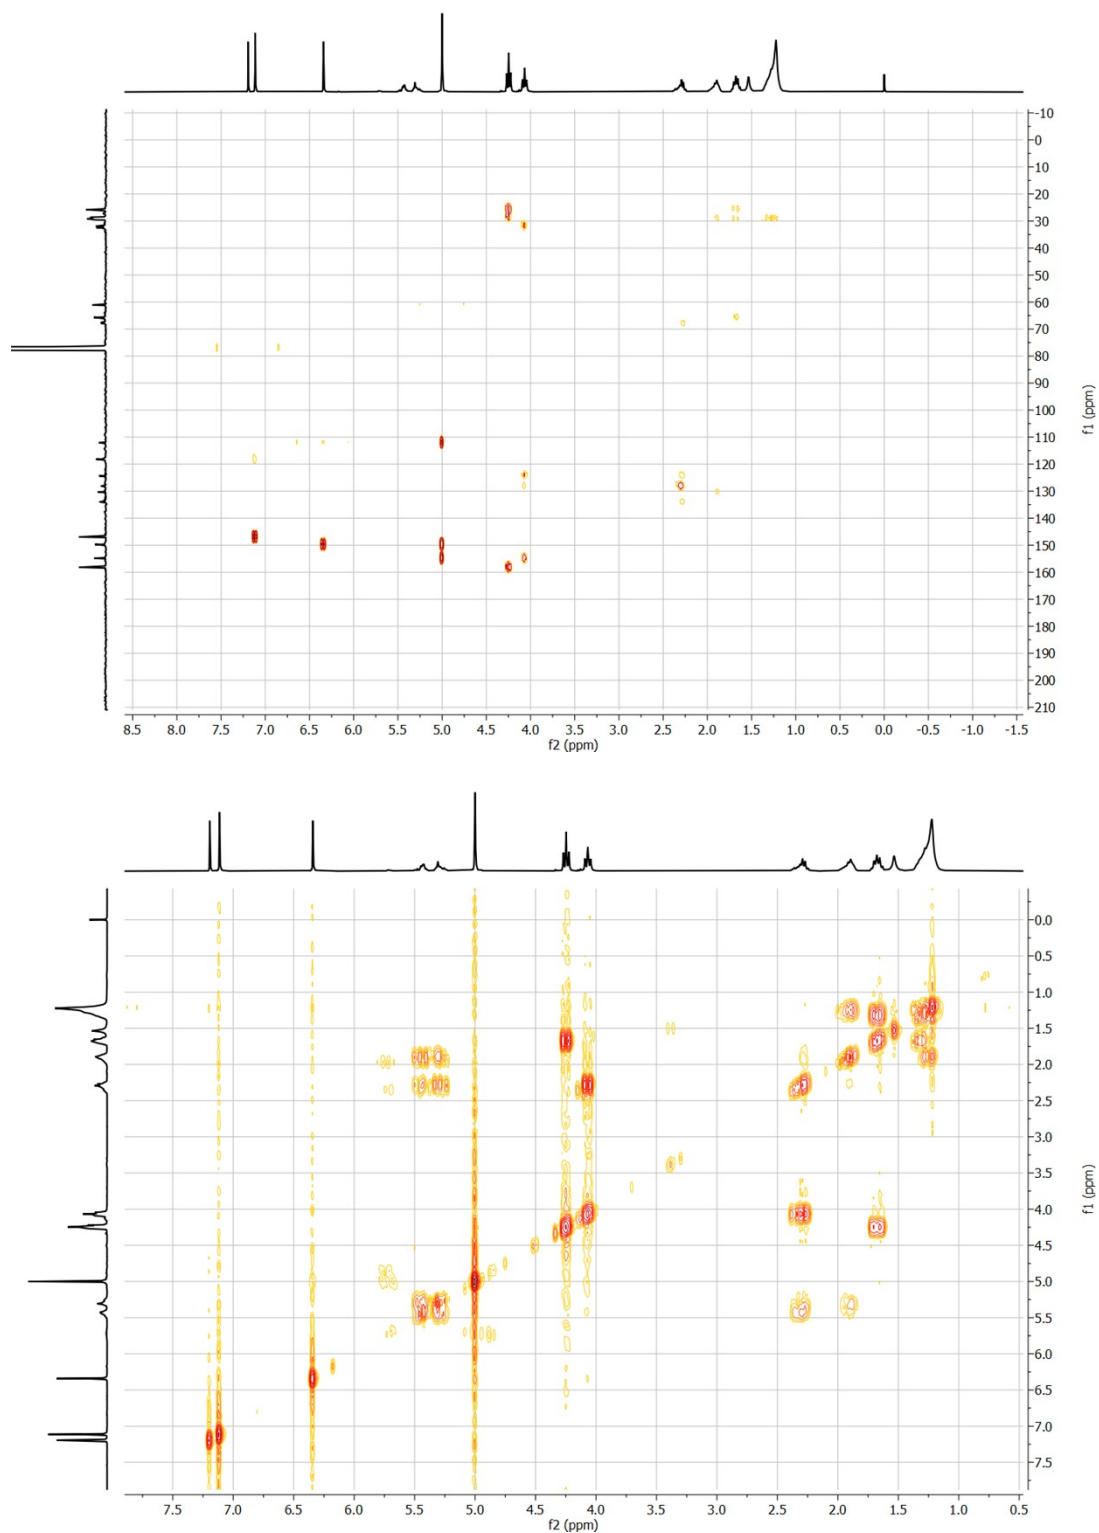

**Figure S28-** (top) 2D  $^1\text{H}$ ,  $^{13}\text{C}$ -HSQC spectra of P(*Dec*-FDE: *But*-BACF) in  $\text{CDCl}_3$ ; (bottom) 2D  $^1\text{H}$ - $^1\text{H}$  COSY spectra of P(*Dec*-FDE: *But*-BACF) in  $\text{CDCl}_3$ .

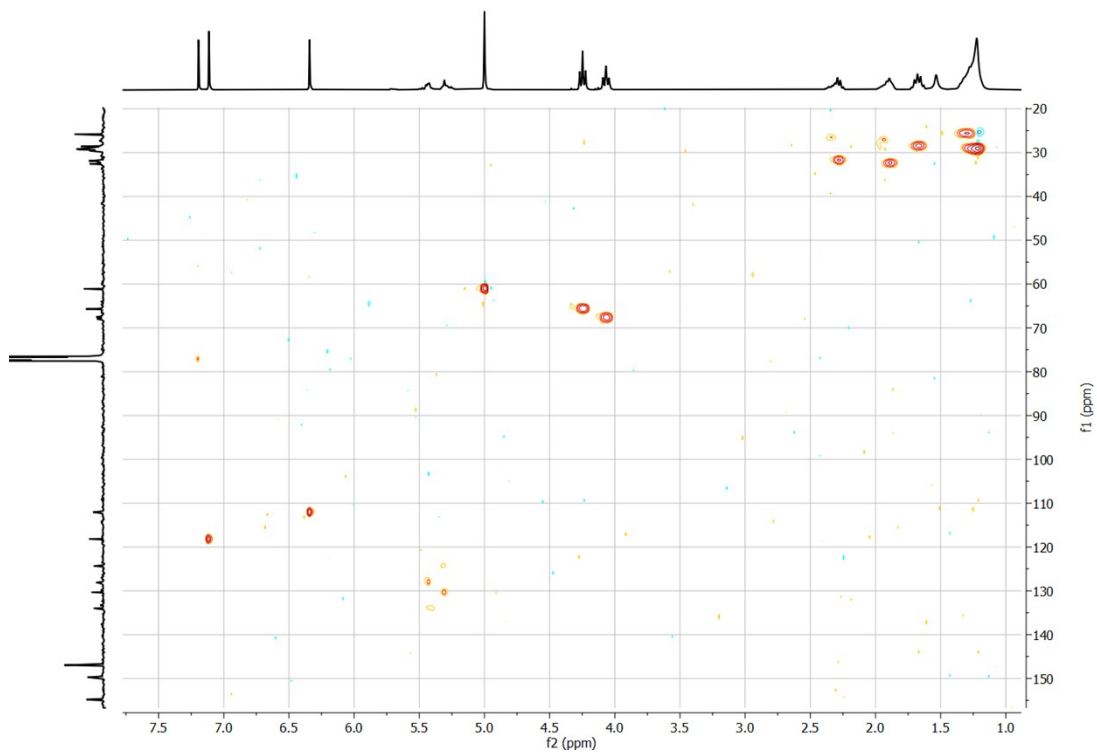

Figure S29- 2D  $^1\text{H}$ ,  $^{13}\text{C}$ -HMQC spectra of P(Dec-FDE: But-BACF) in  $\text{CDCl}_3$ .

## DSC Thermograms

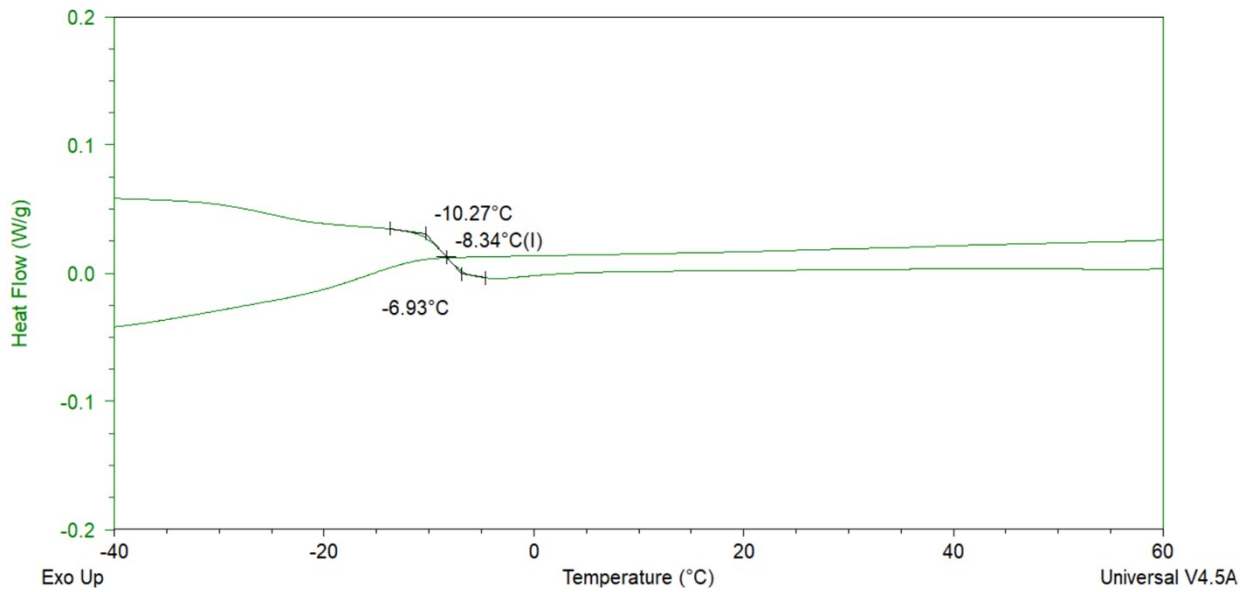

Figure S30- DSC thermogram (3<sup>rd</sup> heat cycle) of P(*But*-BACF).

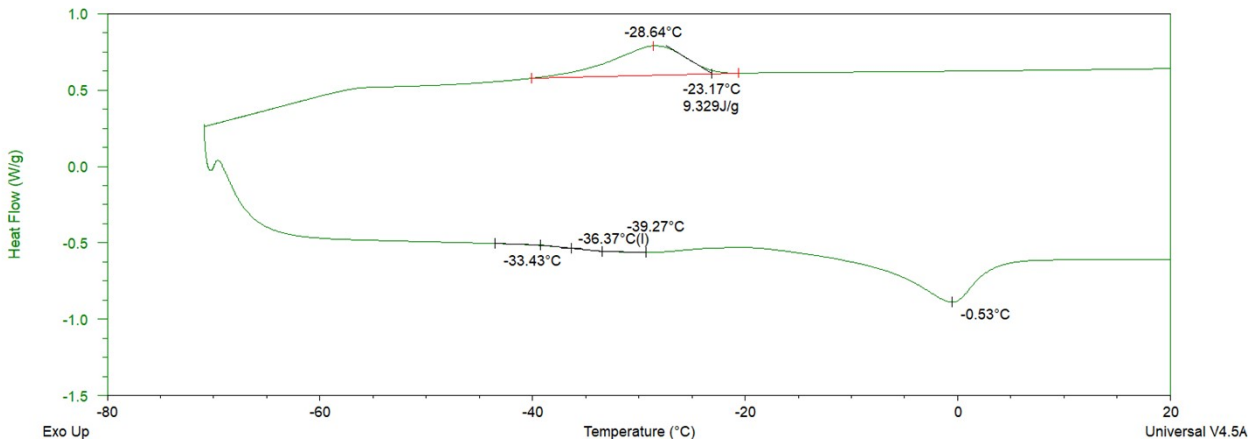

Figure S31- DSC thermogram (3<sup>rd</sup> heat cycle) of P(*Dec*-BACF).

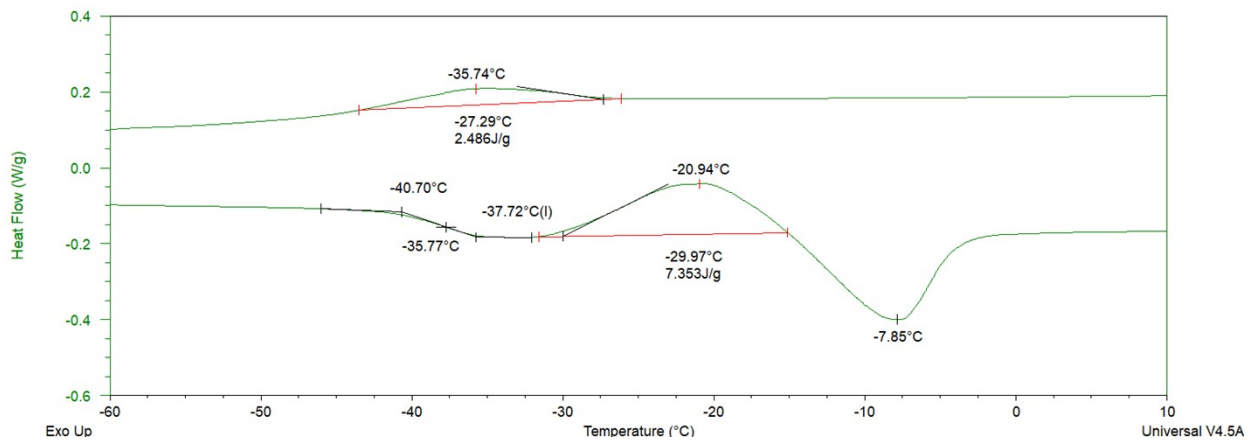

Figure S32- DSC thermogram (3<sup>rd</sup> heat cycle) of P(Dec-BACF: Dec-FDE).

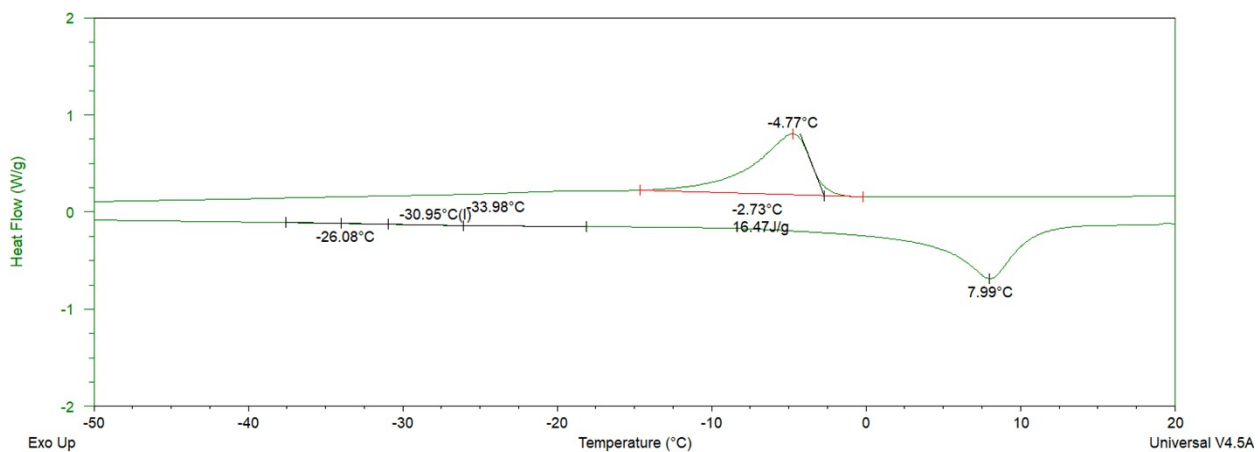

Figure S33- DSC thermogram (3rd heat cycle) of P(Dec-BDMF: Dec-BACF).

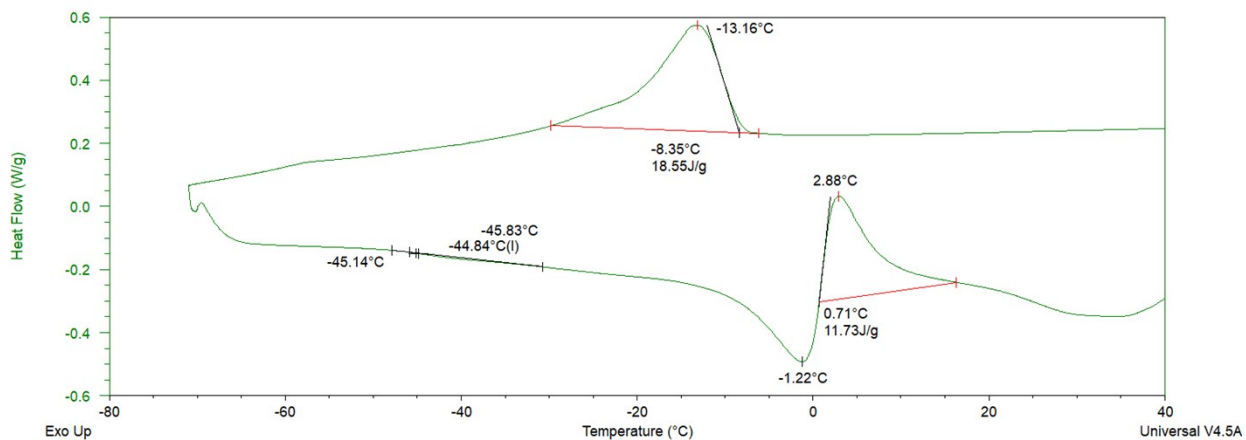

Figure S34- DSC thermogram (3rd heat cycle) of P(Dec-BDMF: Dec-FDE).

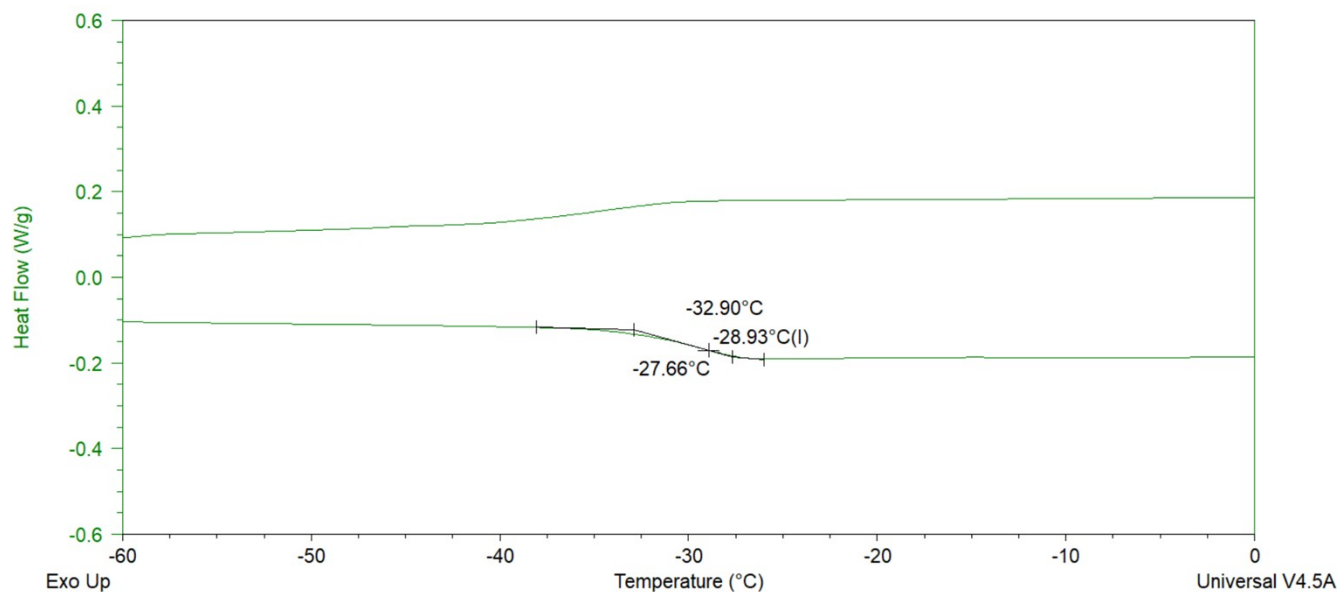

Figure S35- DSC thermogram (3rd heat cycle) of P(Dec-FDE: But-BACF).

### TGA analysis

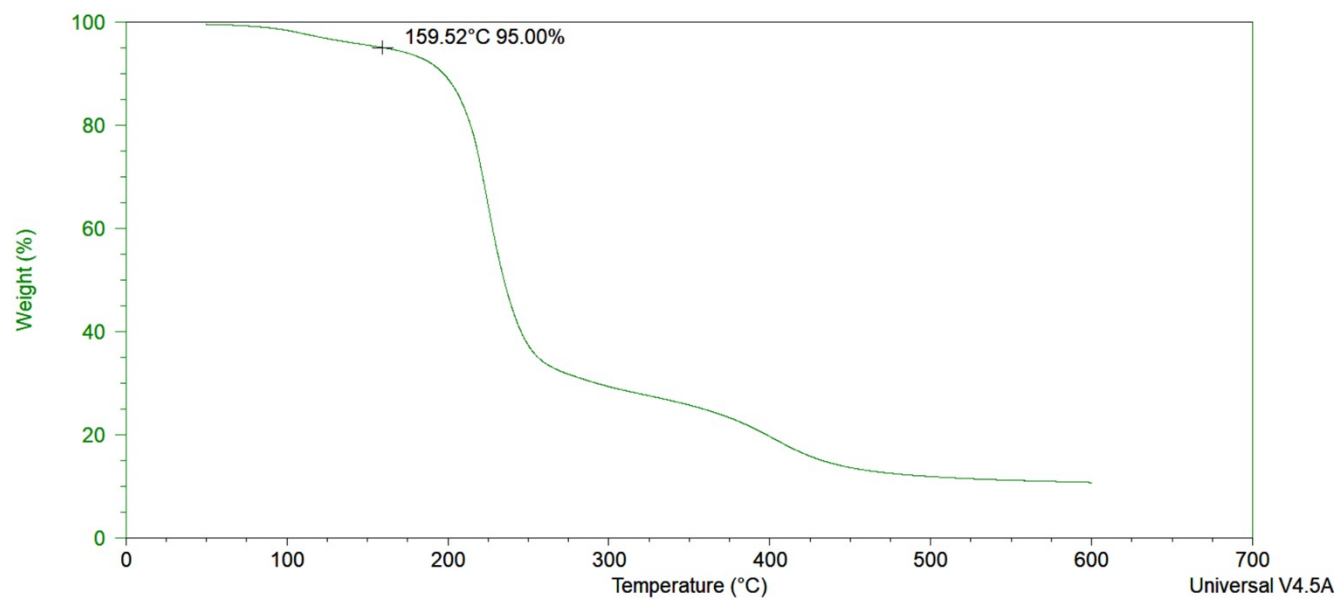

Figure S36- TGA thermogram P(But-BACF).

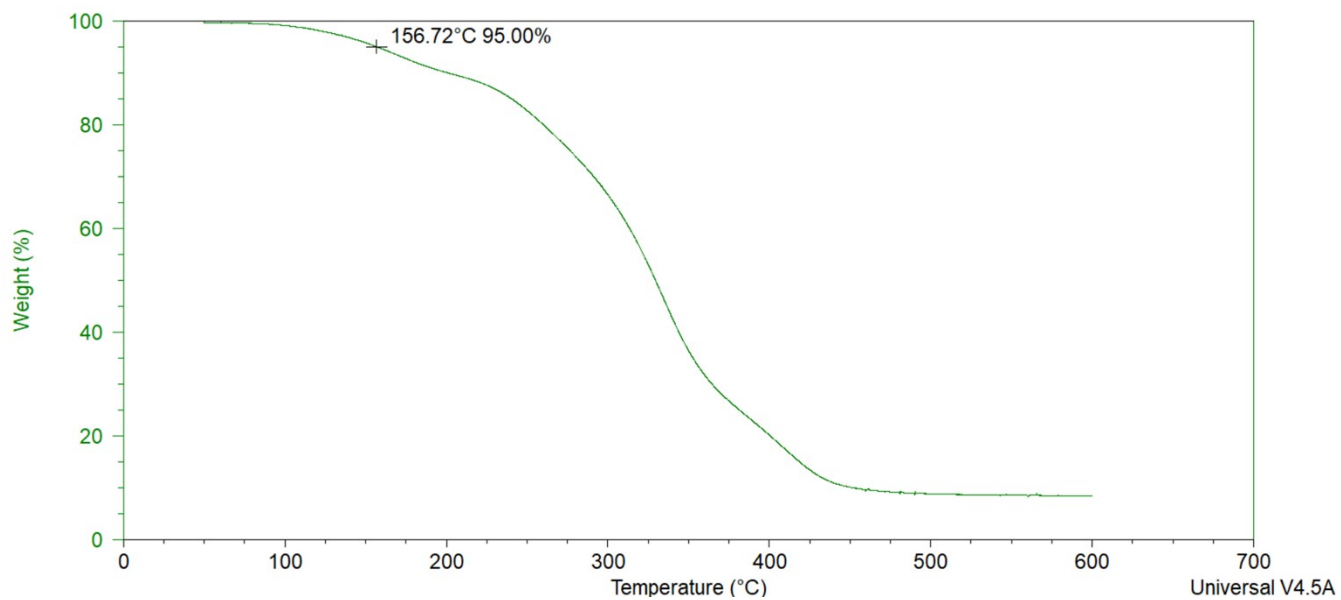

Figure S37- TGA thermogram P(Hex-BACF).

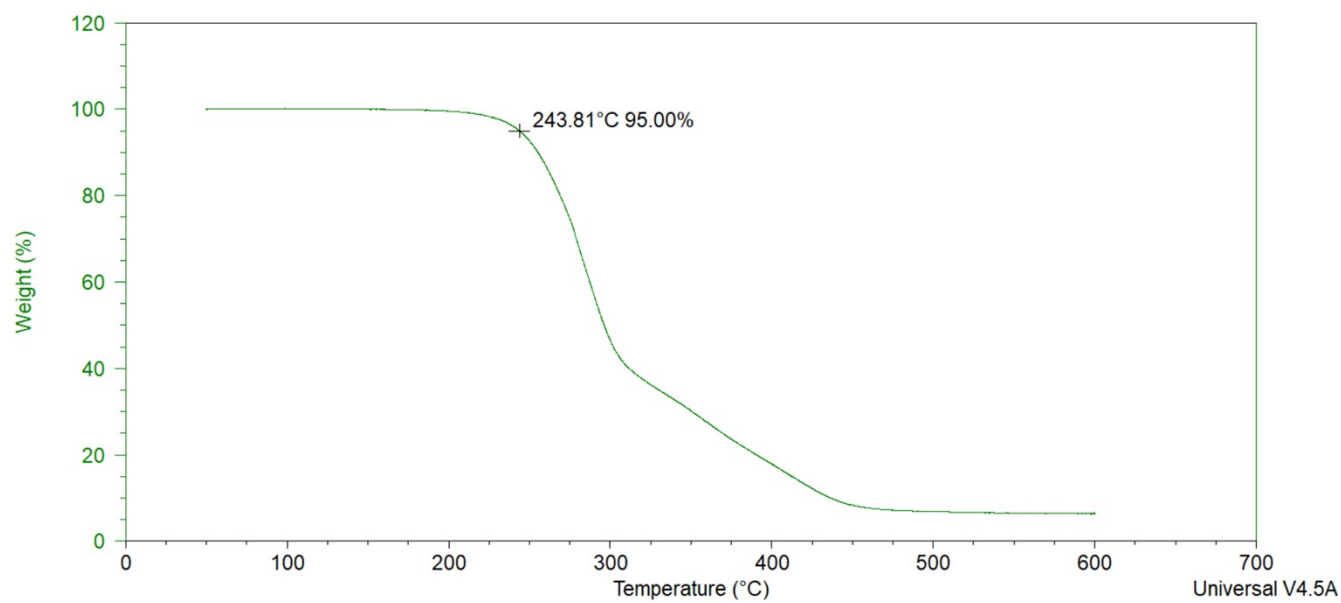

Figure S38- TGA thermogram P(Dec-BACF).

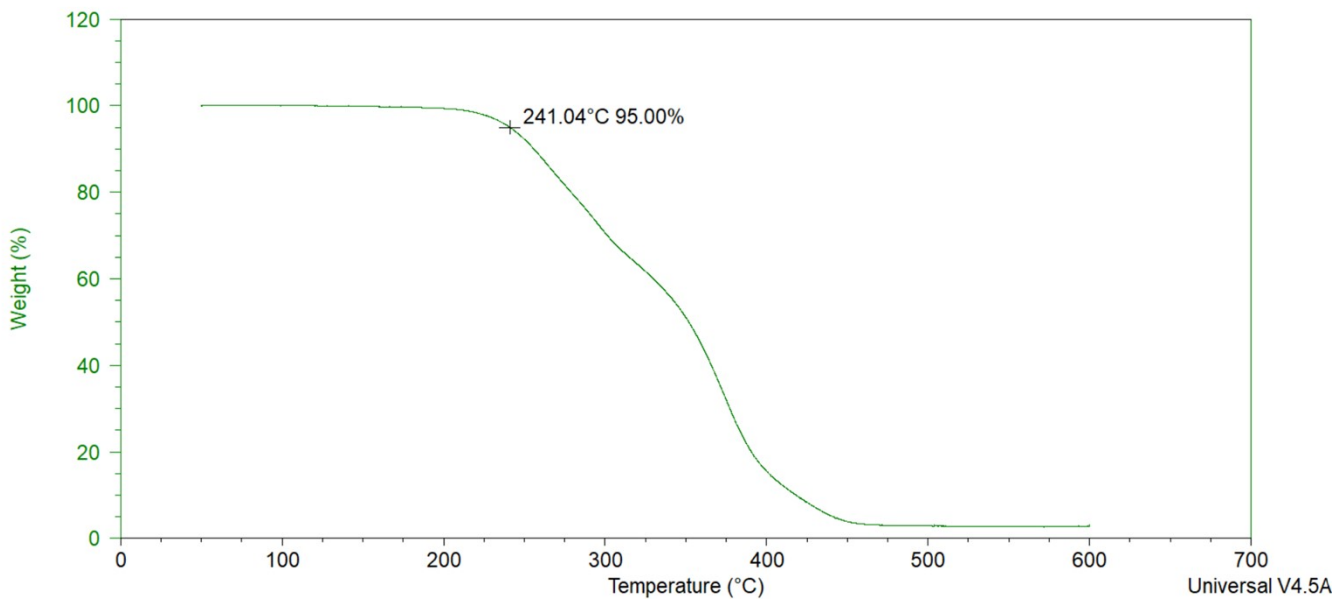

Figure S39- TGA thermogram P(Dec-BACF: Dec-FDE).

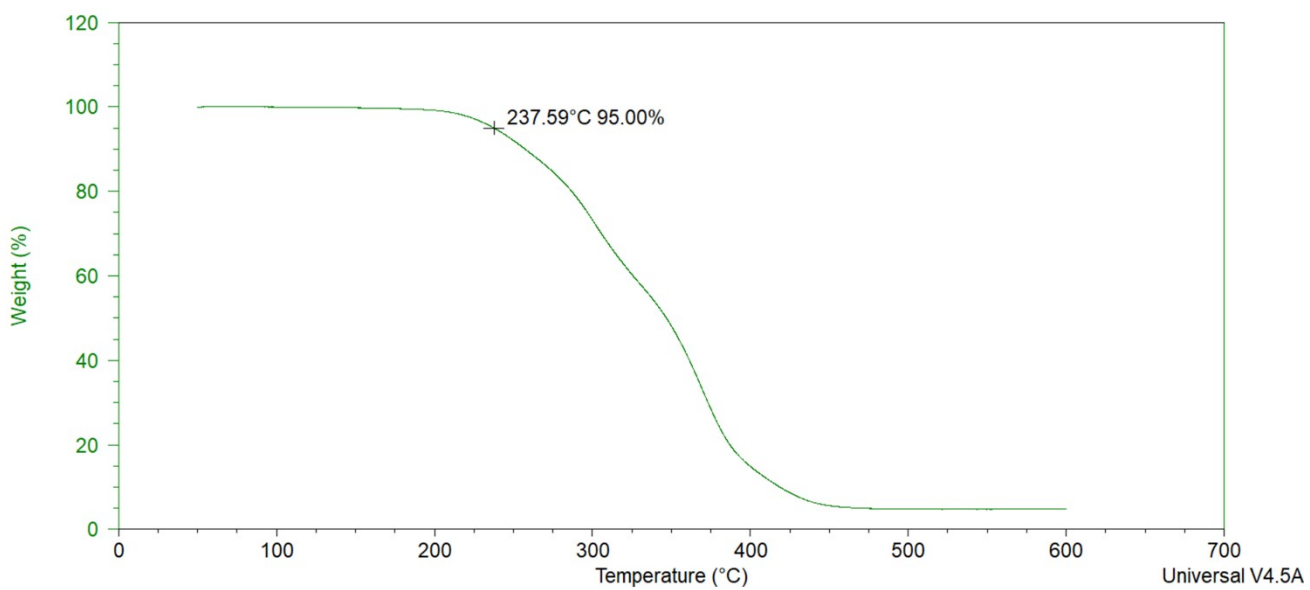

Figure S40- TGA thermogram P(Dec-BDMF: Dec-BACF).

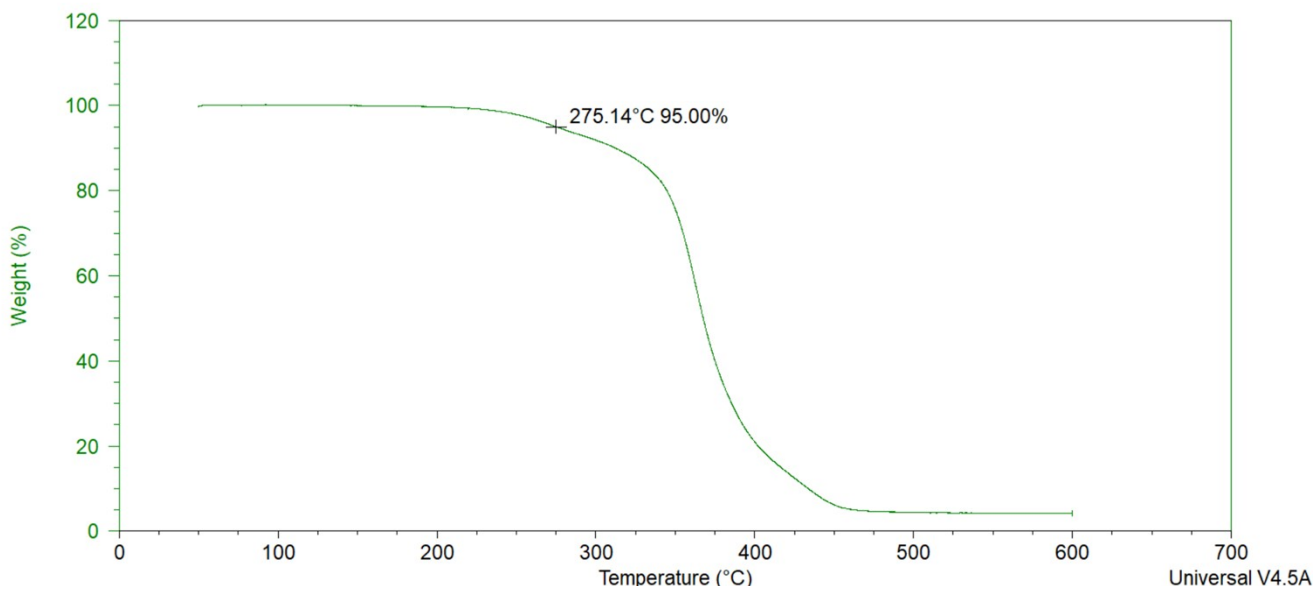

Figure S41- TGA thermogram P(Dec-BDMF: Dec-FDE).

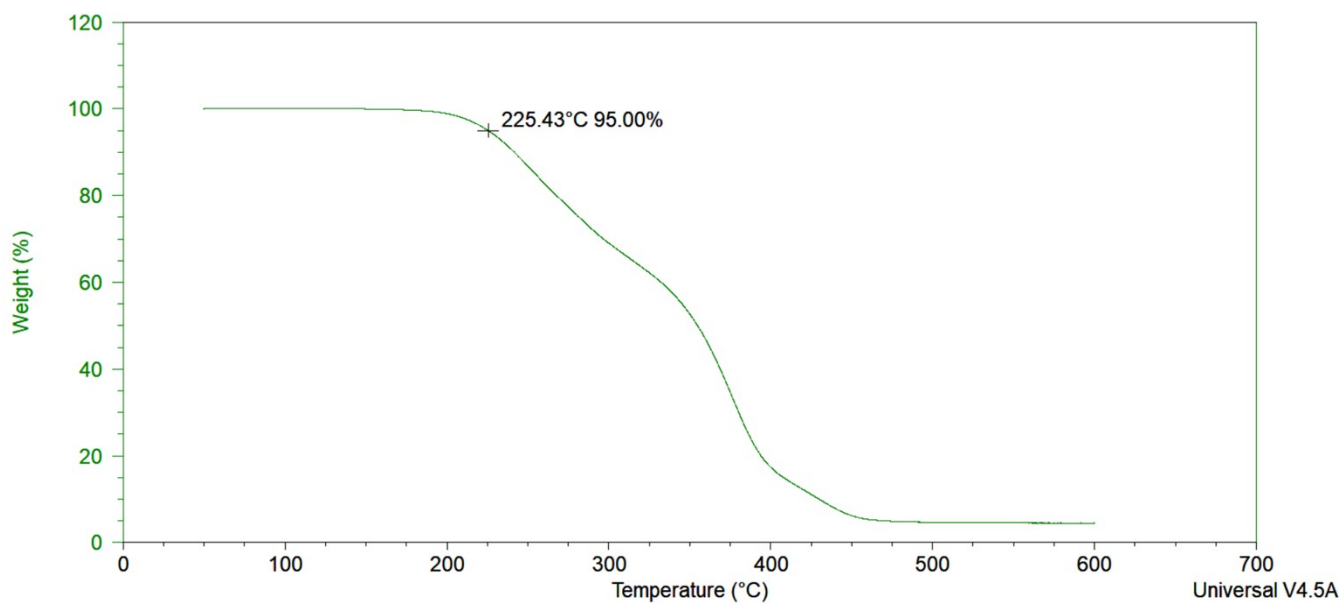

Figure S42- TGA thermogram P(Dec-FDE: But-BACF).



## SEC analysis

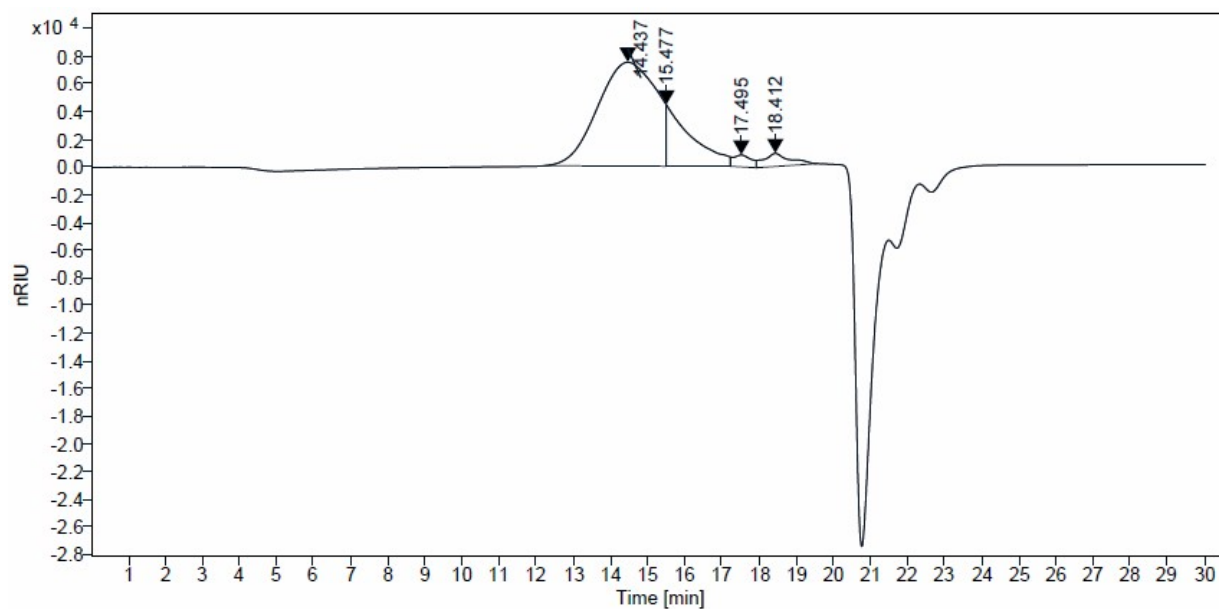

Figure S43- SEC trace of P(But-BACF).

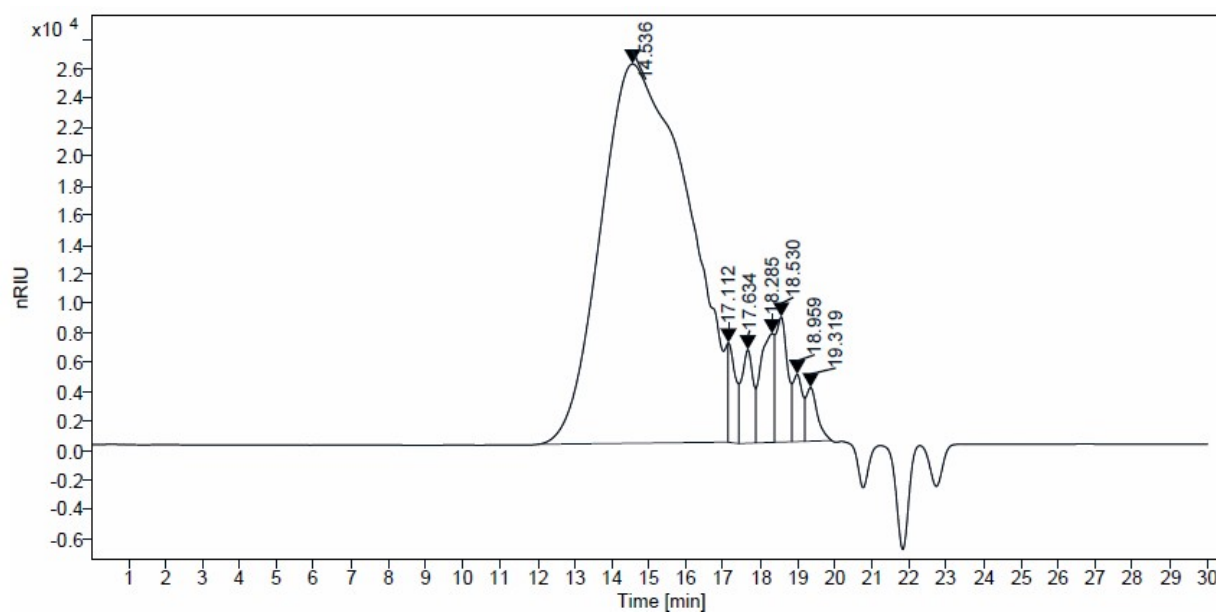

Figure S44- SEC trace of P(Hex-BACF).

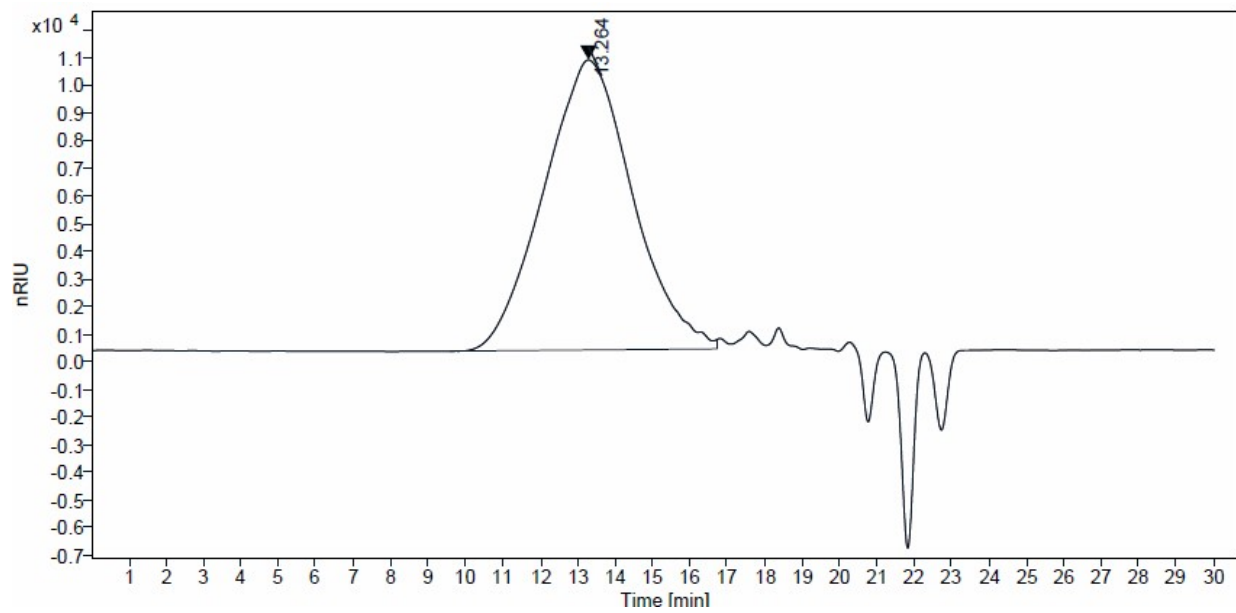

Figure S45- SEC trace of P(Dec-BACF).

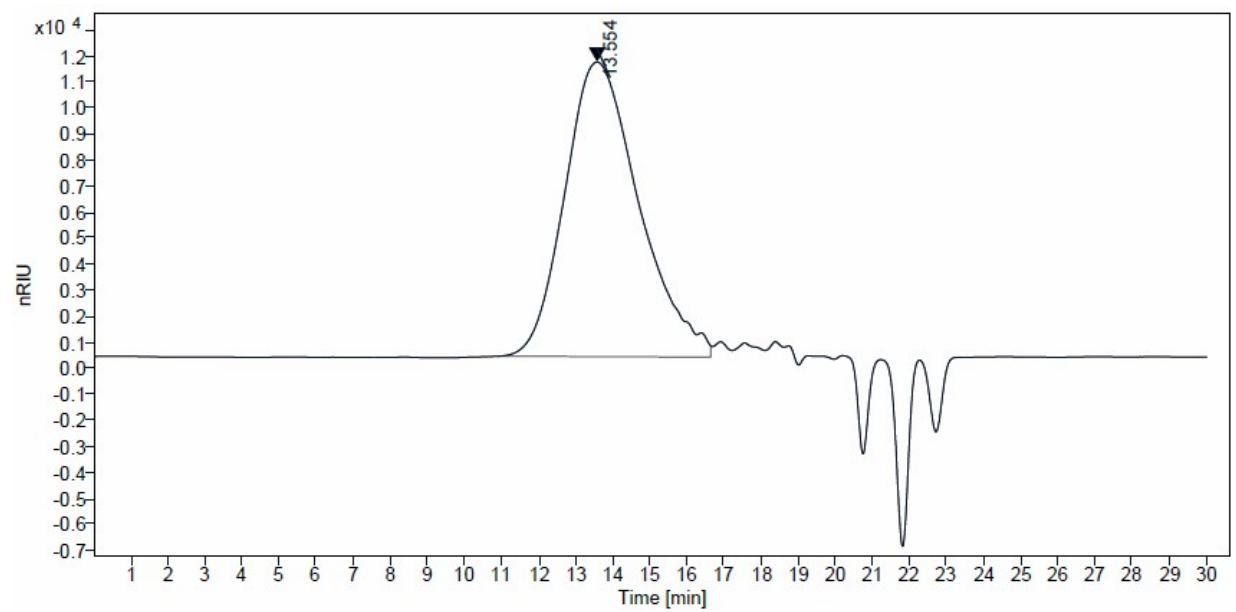

Figure S46- SEC trace of P(Dec-BACF: Dec-FDE).

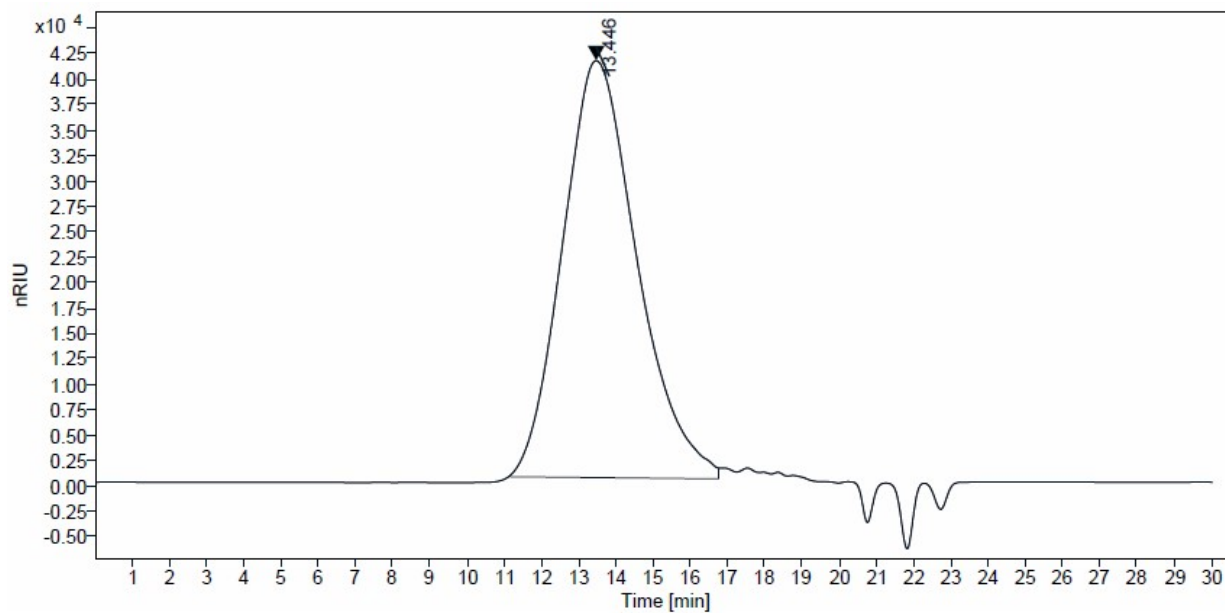

Figure S47- SEC trace of P(Dec-BDMF: Dec-BACF).

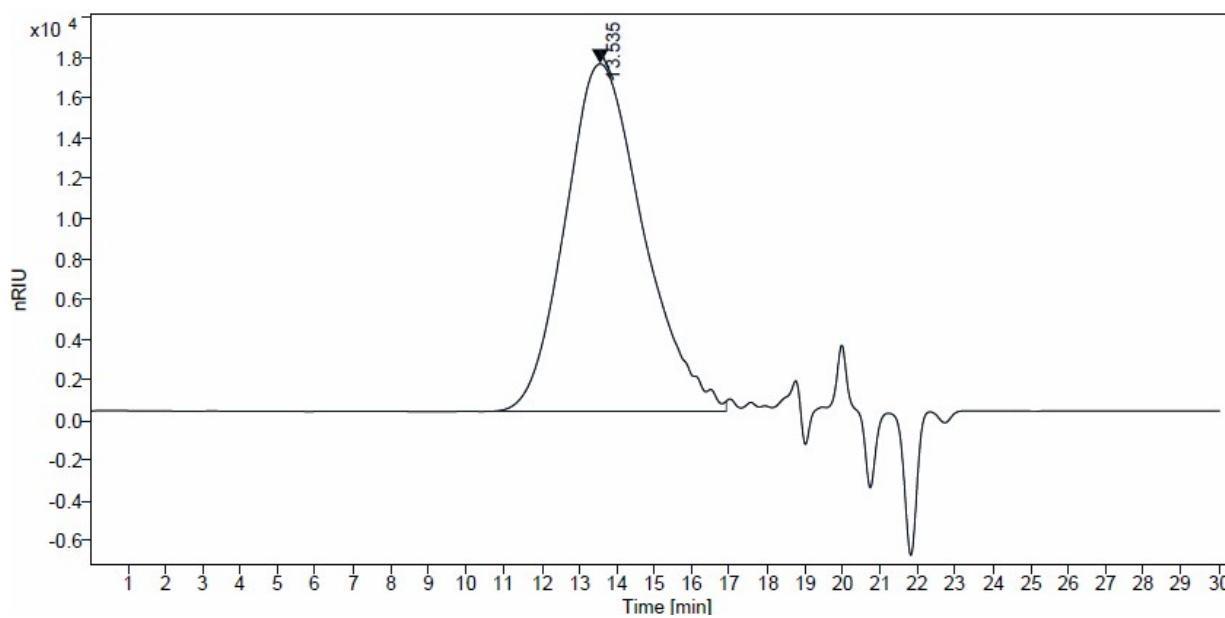

Figure S48- SEC trace of P(Dec-BDMF: Dec-FDE).

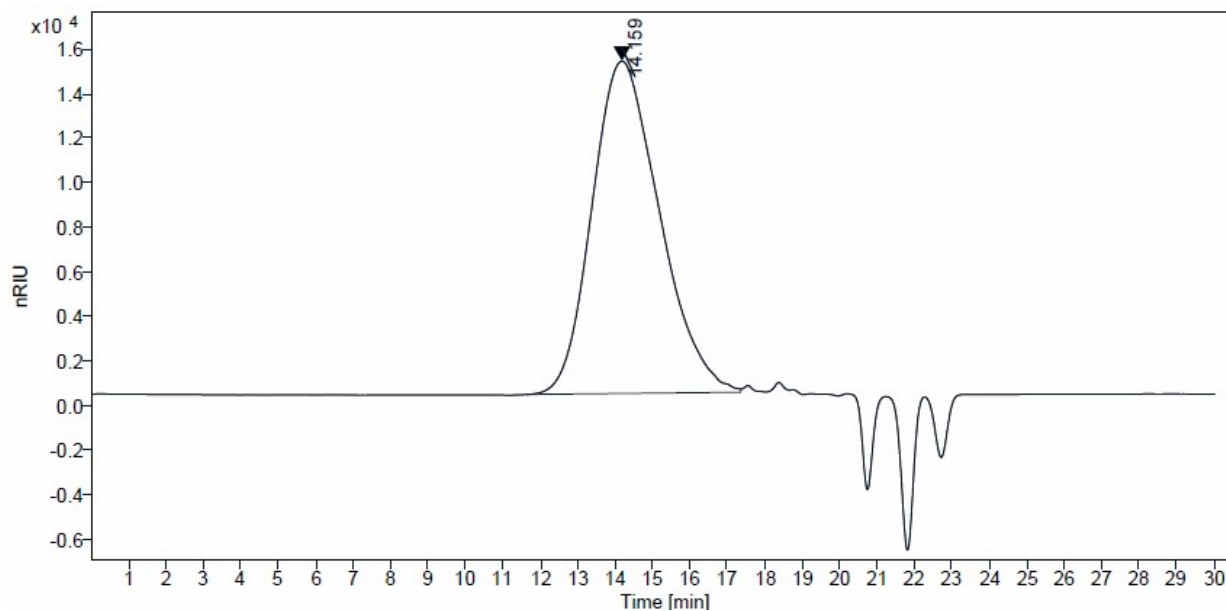

Figure S49- SEC trace of P(Dec-FDE: But-BACF).

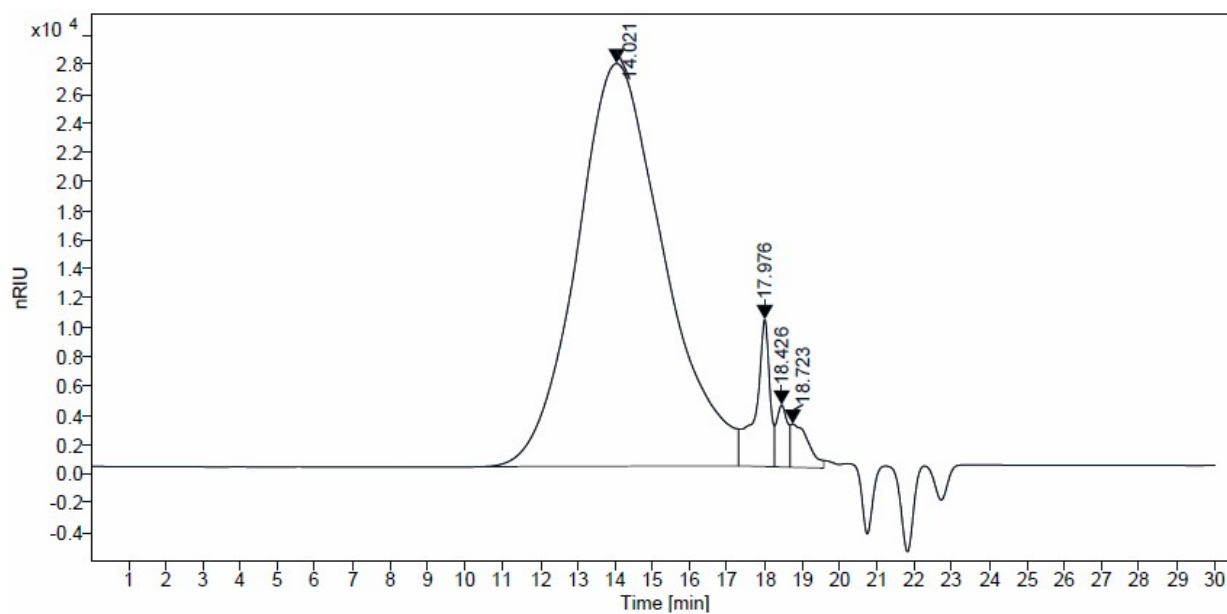

Figure S50- SEC trace of P(Dec-BDMF: But-BACF).

## References

- (1) A. L. Flourat, M. Annatelli, S. Fadlallah, F. Aricò, F. Allais, *Macromol.* 2023, **56**, 8845–8855.
- (2) B. Chícharo, S. Fadlallah, F. Allais, F. Aricò, *ChemSusChem* 2024, **17**, e202301311.
- (3) G. Trapasso, C. Salaris, M. Reich, E. Logunova, C. Salata, K. Kümmerer, A. Figoli, F. Aricò, *Sustain. Chem. Pharm.* 2022, **26**, 100639.
- (4) A. G. Sathicq, M. Annatelli, I. Abdullah, G. Romanelli, F. Aricò, *Sustain. Chem. Pharm.* 2021, **19**.
